# Supplementary material for: Balloon dilation for the treatment of male urethral strictures: a systematic review and meta-analysis
Source: PubMed Central journal article supplement — BMJ Open. 2024 Feb 6;14(2):e071923. doi: 10.1136/bmjopen-2023-071923 (PMC10860052; doi:10.1136/bmjopen-2023-071923), 2024-02-06

# BMJ Open

BMJ Open is committed to open peer review. As part of this commitment we make the peer review history of every article we publish publicly available.

When an article is published we post the peer reviewers' comments and the authors' responses online. We also post the versions of the paper that were used during peer review. These are the versions that the peer review comments apply to.

The versions of the paper that follow are the versions that were submitted during the peer review process. They are not the versions of record or the final published versions. They should not be cited or distributed as the published version of this manuscript.

BMJ Open is an open access journal and the full, final, typeset and author-corrected version of record of the manuscript is available on our site with no access controls, subscription charges or pay-per-view fees (<http://bmjopen.bmj.com>).

If you have any questions on BMJ Open's open peer review process please email [info.bmjopen@bmj.com](mailto:info.bmjopen@bmj.com)

# BMJ Open

## Balloon dilation for the treatment of male urethral strictures: A Systematic Review and Meta-analysis

|                               |                                                                                                                                                                                                                                                                                                                                                                                                                                                                                                                                                                                                                                                                                                                                                                                                          |
|-------------------------------|----------------------------------------------------------------------------------------------------------------------------------------------------------------------------------------------------------------------------------------------------------------------------------------------------------------------------------------------------------------------------------------------------------------------------------------------------------------------------------------------------------------------------------------------------------------------------------------------------------------------------------------------------------------------------------------------------------------------------------------------------------------------------------------------------------|
| Journal:                      | <i>BMJ Open</i>                                                                                                                                                                                                                                                                                                                                                                                                                                                                                                                                                                                                                                                                                                                                                                                          |
| Manuscript ID                 | bmjopen-2023-071923                                                                                                                                                                                                                                                                                                                                                                                                                                                                                                                                                                                                                                                                                                                                                                                      |
| Article Type:                 | Original research                                                                                                                                                                                                                                                                                                                                                                                                                                                                                                                                                                                                                                                                                                                                                                                        |
| Date Submitted by the Author: | 18-Jan-2023                                                                                                                                                                                                                                                                                                                                                                                                                                                                                                                                                                                                                                                                                                                                                                                              |
| Complete List of Authors:     | Li, Xiaoyu; Peking University First Hospital Department of Urology; Peking University Institute of Urology<br>Xu, Chunru; Peking University First Hospital, Department of Urology; Peking University, Institute of Urology<br>Ji, Xing; Peking University First Hospital Department of Urology; Peking University Institute of Urology<br>Zhu, Zhenpeng; Peking University First Hospital, Department of Urology; Peking University, Institute of Urology<br>Cai, Tianyu; Peking University First Hospital, Department of Urology; Peking University, Institute of Urology<br>Guo, Zhenke; Peking University First Hospital Department of Urology; Peking University Institute of Urology<br>Lin, Jian; Peking University First Hospital, Department of Urology; Peking University, Institute of Urology |
| Keywords:                     | UROLOGY, Adult urology < UROLOGY, Kidney & urinary tract disorders < UROLOGY                                                                                                                                                                                                                                                                                                                                                                                                                                                                                                                                                                                                                                                                                                                             |
|                               |                                                                                                                                                                                                                                                                                                                                                                                                                                                                                                                                                                                                                                                                                                                                                                                                          |

SCHOLARONE™  
Manuscripts

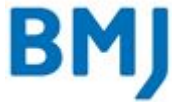

I, the Submitting Author has the right to grant and does grant on behalf of all authors of the Work (as defined in the below author licence), an exclusive licence and/or a non-exclusive licence for contributions from authors who are: i) UK Crown employees; ii) where BMJ has agreed a CC-BY licence shall apply, and/or iii) in accordance with the terms applicable for US Federal Government officers or employees acting as part of their official duties; on a worldwide, perpetual, irrevocable, royalty-free basis to BMJ Publishing Group Ltd ("BMJ") its licensees and where the relevant Journal is co-owned by BMJ to the co-owners of the Journal, to publish the Work in this journal and any other BMJ products and to exploit all rights, as set out in our [licence](#).

The Submitting Author accepts and understands that any supply made under these terms is made by BMJ to the Submitting Author unless you are acting as an employee on behalf of your employer or a postgraduate student of an affiliated institution which is paying any applicable article publishing charge ("APC") for Open Access articles. Where the Submitting Author wishes to make the Work available on an Open Access basis (and intends to pay the relevant APC), the terms of reuse of such Open Access shall be governed by a Creative Commons licence – details of these licences and which [Creative Commons](#) licence will apply to this Work are set out in our licence referred to above.

Other than as permitted in any relevant BMJ Author's Self Archiving Policies, I confirm this Work has not been accepted for publication elsewhere, is not being considered for publication elsewhere and does not duplicate material already published. I confirm all authors consent to publication of this Work and authorise the granting of this licence.

1  
2  
3  
4 **Balloon dilation for the treatment of male urethral strictures: A**  
5  
6 **Systematic Review and Meta-analysis**  
7  
8  
9  
10  
11  
12  
13  
14  
15

16 **Xiaoyu Li<sup>1,2,3</sup>, Chunru Xu<sup>1,2,3</sup>, Xing Ji<sup>1,2,3</sup>, Zhenpeng Zhu<sup>1,2,3</sup>, Tianyu Cai<sup>1,2,3</sup>,**  
17 **Zhenke Guo<sup>1,2,3</sup>, Jian Lin<sup>1,2,3\*</sup>**

19 1. Department of Urology, Peking University First Hospital, Beijing 100034, China;

20 2. Institute of Urology, Peking University, Beijing 100034, China;

21 3. National Urological Cancer Center, Beijing, 100034, China

22  
23 \*. Correspondence: **Jian Lin, M.D.** (linjianbj@163.com); Department of Urology,  
24 Peking University First Hospital; Institute of Urology, Peking University, National  
25 Urological Cancer Center, Beijing. No. 8, Street Xishiku, District Xicheng, Beijing,  
26 China, 100034.  
27  
28  
29  
30  
31  
32  
33  
34  
35  
36  
37  
38  
39  
40  
41  
42  
43  
44  
45  
46  
47  
48  
49  
50  
51  
52  
53  
54  
55  
56  
57  
58  
59  
60



## Abstract

**Objective:** The minimally invasive endoluminal treatment of urethral strictures has been a topic of concern for decades. The aim of this study is to review and discuss the safety, efficacy and influencing factors of balloon dilatation for male urethral stricture.

**Design:** Systematic review and meta-analysis.

**PROSPERO registration number:** CRD42022334403.

**Data sources:** Embase, Medline, Web of Science, Cochrane Library and Scopus were searched for publications before July 17, 2022.

**Study selection:** Two independent researchers screened and assessed the results, and all clinical studies on balloon dilation for the treatment of urethral strictures in men were included.

**Data extraction and synthesis:** Success rate, rate of adverse events, International Prostate Symptom Scores (IPSS), maximum uroflow (Q<sub>max</sub>) and post-void residual urine volume (PVR) were the main outcomes. Stata 14.0 was used for statistical analysis.

**Results:** 15 studies with 715 patients were finally included in this systematic review. Pooled results of eight studies showed that the reported success rate of simple balloon dilation for male urethral strictures was 67.07% (95% CI: 55.92%-77.36%). The maximum urinary flow rate at 3 months (RR=2.6510, 95% CI: 1.0681-4.2338,  $p < 0.01$ ) and the maximum urinary flow rate at one year (RR=1.6637, 95% CI: 1.1837-2.1437,  $p < 0.05$ ) were significantly changed after dilation. There is insufficient evidence to suggest that balloon dilation is superior to optical internal urethrotomy (OIU) and direct visual internal urethrotomy (DVIU) (RR=1.4754, 95%CI: 0.7306-2.9793,  $p=0.278$ ).

**Conclusion:** Balloon dilatation may be an important intermediate choice for the treatment of male urethral stricture. The etiology, location, length, previous treatment and other comprehensive factors of urethral stricture may be associated with the efficacy of balloon dilation.

**Key words:** Balloon dilation, urethral stricture, systematic review, meta-analysis

### Strengths and limitations of this study

As of January 14, 2023, this is the first systematic review of balloon dilation for men with urethral strictures. All clinical studies on balloon dilation for the treatment of urethral strictures in men were included.

Although the information we can obtain is quite limited, the relevant influencing factors analyzed and discussed in this study should be concerned in the future development of balloon dilation.

Balloon dilation of urethral stricture to date has no sufficient statistical power to be recommended and to become a clinically standpoint. More high-quality randomized clinical trials are needed to provide stronger evidence of the benefits of balloon dilation.

## 1. Introduction

As an ancient disease relatively common in men, urethral stricture refers to any abnormal narrowing of the anterior or posterior urethra. In some susceptible populations, the incidence of male urethral stricture disease is as high as 0.6%, with more than 5,000 hospitalizations per year [1]. The most typical symptoms of patients are weakened urine flow and even urinary retention, which seriously affects the quality of life [2]. The etiology of urethral stricture is complex, including trauma, infection, iatrogenic, lichen sclerosus, idiopathic, etc. Iatrogenic urethral injury is the most common cause in resource-rich countries, whereas infections and trauma are more common in developing countries [3, 4]. With the continuous development of medical technology, the rapid increase in the incidence of iatrogenic urethral stricture is an urgent problem to be solved. Catheterization, transurethral manipulation, prostate surgery, radiotherapy, and chemotherapy can all cause irreversible stricture damage to the urethra [5-8].

Although urethroplasty has been recognized as the curative treatment for urethral strictures, dilation and direct visual internal urethrotomy (DVIU) are still widely used and effective for single bulbar urethral strictures < 2 cm (especially < 1 cm) with the success rate of 35-70 % [3, 9]. There is currently a lack of evidence to evaluate whether dilation or DVIU is more effective, so both have the same therapeutic indications [10].

Balloon dilation is a special type of dilation that has a long history of treating urethral strictures in men. Russinovich, N. A. E. et al were the first to report preliminary results of 7 cases of male urethral strictures treated with balloon dilation in 1980, which was painless compared to traditional dilation methods and associated mucosal and periurethral injury [11]. Subsequently, Pinot, J. J. dilated the urethra of 25 patients using an inflatable balloon catheter, which included atraumatic catheterization through a vascular catheter under urethoscopy, followed by inflation of the balloon catheter into a flexible guide [12]. The dilation was controlled by voiding urethrography and was much less uncomfortable than conventional urethral dilation, with recurrence in only 3 of 25 patients. Immediately, Glesy, J. D. designed a new coaxial balloon dilator for the treatment of urethral stricture, and pointed out that the balloon dilator can expand slowly and gradually, which is better than the traditional rapid and sudden expansion [13]. More studies have shown that balloon dilation produces minimal trauma and immediate symptom relief, with less patient discomfort and a low complication rate [14-19]. Since angiography has a certain degree of radioactivity, B-ultrasound has been used in the control of balloon dilation, and good clinical results have been initially achieved [20]. Further research found that direct visually controlled balloon dilation under cystoscopy can gently dilate the urethra with higher safety and efficacy [21].

As is a well-tolerated minimally invasive endourology procedure widely used in the clinical management, balloon dilation may have higher accuracy and lower complication rates than simple dilation, and a longer recurrence-free time. Our

1  
2  
3 objective was to assess the efficacy and safety of balloon dilation and its associated  
4 influencing factors.  
5  
6

## 7 8 **2. Materials and methods**

### 9 10 **2.1 Search strategy**

11 This study followed the guidelines of the PRISMA statement [22], and the specific  
12 protocol was registered on PROSPERO with the registration number  
13 CRD42022334403. Performing with Medical Subject Headings and free text terms,  
14 we searched the relevant records published prior to July 17, 2022 in the following  
15 databases: Medline, Embase, Cochrane Library, Web of Science and Scopus. The  
16 major search terms were “Urethral Stricture” or “Urethral Stenosis” and “Balloon”  
17 and “Dilatation” or “Dilation” in English. Information on studies in progress was  
18 sought by searching relevant trial registers including ClinicalTrials.gov.  
19  
20  
21

### 22 23 **2.2 Eligibility criteria**

24 Two researchers (X.L. and C.X.) screened and assessed the search results  
25 independently. The inclusion criteria included: (1) male patients diagnosed as urethral  
26 strictures; (2) balloon dilation was applied as the main intervention, not including  
27 patient self-dilation; (3) clinical studies about patients, retrospective or prospective;  
28 (4) report of the success rate and the rate of adverse events.  
29

30 Conference abstracts were eligible for inclusion if they reported sufficient outcome  
31 data. If several articles were all related to the same study, the most recent publication  
32 with the most complete data was included in the systematic review. The consensus  
33 was finally reached through consultation and discussion in the event of any  
34 disagreement and differences between the two researchers.  
35  
36

### 37 38 **2.3 Quality assessment**

39 According to the type of study, the quality of included studies was independently  
40 assessed by two researchers (X.L. and C.X.). All observational studies were assessed  
41 using the Newcastle-Ottawa Scale (NOS) in terms of population selection,  
42 comparability, and outcome evaluation [23]. Randomized controlled trial (RCT)  
43 studies were assessed using the Jadad Quality Scale, and articles with the score >3  
44 were considered as high-quality research [24]. For single-arm clinical trials, the first 8  
45 items of the Methodological Index for Non-randomized Studies (MINORS) scale  
46 were used for assessment[25].  
47  
48  
49

### 50 51 **2.4 Data extraction**

52 We extracted data on success rate, rate of adverse events, International Prostate  
53 Symptom Scores (IPSS), maximum uroflow (Qmax, mL/sec) and post-void residual  
54 urine volume (PVR). When disagreements arise, a third reviewer will participate in  
55 discussions and mediate to reach a consensus.  
56  
57  
58

### 59 60 **2.5 Statistics analysis**

1  
2  
3 Stata 14.0 (StataCorp, USA) was applied for statistical analysis, reporting success rate  
4 and adverse effects rate as proportions.  $I^2$  index was used to test the between-study  
5 heterogeneity. When  $I^2 > 50\%$ , it was considered significant heterogeneity and the  
6 random effects model was used for pooled analysis, otherwise less heterogeneity was  
7 considered and the fixed effects model was used.  
8  
9

## 10 **2.6 Patient and public involvement**

11 None.  
12  
13  
14

## 15 **3. Results**

### 16 **3.1 Study selection and risk of bias**

17 The flowchart of the study retrieval process is shown in Fig 1. A total of 715 articles  
18 were identified from the initial search of the aforementioned databases, of which 335  
19 articles were excluded as duplicates. Titles, keywords and abstracts were reviewed  
20 and 72 initial records were retained. Through the evaluation of the full text, 57 of  
21 them were excluded. For articles referring to the same clinical trial, we only reserve  
22 the latest and most comprehensive ones. Ultimately, we included 15 studies for  
23 systematic review with a total of 842 patients.  
24  
25

26 Table 1 presents the main characteristics of the included studies. These articles were  
27 published from 1988-2022, with 13 articles published after 2010 accounting for the  
28 vast majority. Of these, there are 1 randomized controlled trial [26], 2 single-arm  
29 clinical trials [27, 28], 2 case-control studies [29, 30], and 10 retrospective case  
30 studies [31-40].  
31  
32

33 There was considerable risk of bias in the meta-analyses, most of which stemmed  
34 from the retrospective design of the studies and the lack of valid controls. Since the  
35 operation is often influenced by the subjective wishes and preferences of the patients  
36 and surgeons, unavoidable selection bias may exist. Some confounding factors such  
37 as age, etiology, length of stenosis, and patient baseline physical condition were  
38 present in most studies. In addition, due to the small sample size of some of the  
39 included studies, there are certain limitations in reflecting the overall clinical  
40 situation. RCTs with better design, larger sample sizes, and more comparable control  
41 groups are needed to further illustrate the efficacy and safety of balloon dilation in the  
42 future.  
43  
44  
45  
46  
47  
48  
49  
50  
51  
52  
53  
54  
55  
56  
57  
58  
59  
60

**Table 1: The main characteristics of included studies.**

| Study                    | Year | Country                         | Type of Study             | Article Type        | NOS Score (0-9) | Jadad Score (0-7) | MINORS Score (0-24) |
|--------------------------|------|---------------------------------|---------------------------|---------------------|-----------------|-------------------|---------------------|
| Virasoro, Ramon et al.   | 2022 | USA, Dominican Republic, Panama | Single-arm Clinical Trial | Journal article     | /               | /                 | 10                  |
| Elliott, S. P. et al.    | 2022 | USA, Canada                     | RCT                       | Journal article     | /               | 5                 | /                   |
| Beeder, L. A. et al.     | 2022 | USA                             | Retrospective Case Study  | Journal article     | 3               | /                 | /                   |
| Alibekov, M. M. et al.   | 2021 | Russia                          | Retrospective Case Study  | Journal article     | 2               | /                 | /                   |
| Yi, Y. A. et al.         | 2020 | USA                             | Retrospective Case Study  | Journal article     | 3               | /                 | /                   |
| Kumano, Y. et al.        | 2019 | Japan                           | Case Control Study        | Journal article     | 5               | /                 | /                   |
| Zhou, Y. et al.          | 2016 | China                           | Retrospective Case Study  | Journal article     | 2               | /                 | /                   |
| Yu, S. C. et al.         | 2016 | China                           | Case Control Study        | Journal article     | 6               | /                 | /                   |
| Chhabra, J. S. et al.    | 2016 | India                           | Retrospective Case Study  | Journal article     | 3               | /                 | /                   |
| Ishii, Gen et al.        | 2015 | Japan                           | Retrospective Case Study  | Journal article     | 3               | /                 | /                   |
| Mao, D. et al.           | 2014 | China                           | Retrospective Case Study  | Journal article     | 2               | /                 | /                   |
| Vyas, J. B. et al.       | 2013 | India                           | Retrospective Case Study  | Journal article     | 3               | /                 | /                   |
| Alguersuari, A. et al.   | 2012 | Spain                           | Retrospective Case Study  | Conference abstract | 2               | /                 | /                   |
| MacDiarmid, S. A. et al. | 2000 | USA                             | Retrospective Case Study  | Journal article     | 2               | /                 | /                   |
| Mohammed, S. H. et al.   | 1988 | Denmark                         | Single-arm Clinical Trial | Journal article     | /               | /                 | 6                   |

1  
2  
3 NOS, Newcastle Ottawa Scale; MINORS, Methodological Index for Non-randomized Studies.  
4  
5  
6

### 7 **3.2 The principle of balloon dilation**

8 The principle of balloon expansion is to apply radial force along the balloon span at  
9 the stenosis. While the principle of traditional optical internal urethrotomy is to  
10 achieve epithelial regeneration by incising scar tissue. Compared with the parallel  
11 force brought by traditional rigid dilation, balloon dilation has less shear force and  
12 less trauma, which can reduce the risk of cavernous fibrosis and cause less discomfort  
13 [30, 41, 42]. Balloon dilation can also make the fibrous scar in the stenosis more  
14 evenly fractured, presenting a 360° annular expansion, thereby increasing the inner  
15 diameter of the stenotic segment, and during the balloon dilation process, the urethral  
16 pressure gradually increases, and the expansion is slow and gentle, so as to avoid  
17 blood vessels due to violence [13]. Squeeze bleeding has the advantage of one-time  
18 expansion. In addition, the smooth balloon can avoid normal urethral mucosal  
19 damage.  
20  
21  
22  
23  
24

### 25 **3.3 Safety assessment and incidence of adverse events**

26 Urinary tract infection, urinary retention and postoperative hematuria and dysuria are  
27 the main complications of balloon dilation. Therefore, strict aseptic and standardized  
28 operations are required during the surgical operation to prevent and avoid the  
29 occurrence of adverse events as much as possible.  
30  
31

32 We performed a pooled analysis of reported adverse event rates for urinary tract  
33 infection and urinary retention. The pooled incidence of infection in patients after  
34 balloon dilation was 3.27% (95% CI: 1.2%-8.86%; heterogeneity:  $I^2=46.2589\%$ ,  $p=$   
35  $0.1338$ ) (Fig 2A). While, the pooled incidence of urinary retention was 8.31% (95%  
36 CI: 1.84%-18.39%; heterogeneity:  $I^2=84.6223\%$ ,  $p<0.05$ ) (Fig 2B). Urinary tract  
37 infection is the most common complication within 30 days of balloon dilation, and  
38 some patients require antibiotic treatment [31]. Some patients also have transient  
39 hematuria after surgery, but no further treatment such as blood transfusion is required  
40 [30, 31]. Furthermore, Yu, S. C.'s study also found that the incidence of major  
41 postoperative complications such as urethral bleeding and urinary tract infection in  
42 the balloon dilatation group was lower than that in the DVIU group (urethral  
43 bleeding: 2/31 vs. 8/25,  $P=0.017$ ; UTI: 1/31 vs. 6/25  $P=0.037$ ) [30].  
44  
45  
46  
47  
48

### 49 **3.4 Clinical efficacy of balloon dilation for male urethral strictures**

50 We summarized the clinical characteristics and the efficacy of balloon dilation  
51 included in the literature, and the relevant contents are shown in Table 2 & Table 3.  
52 At present, there is a lack of objective and recognized indicators to evaluate the  
53 clinical effect of balloon dilation. Perceptions of dilation success vary among  
54 surgeons, and patients' performance on stricture recurrence is highly individual, with  
55 rates of dilation success varying across specific studies. For studies with conventional  
56 balloon dilatation, we defined success of balloon dilatation as no recurrence or no  
57 further stricture treatment during follow-up, excluding studies with a sample size of  
58  
59  
60



less than 30 and merging data from 8 studies published in 2012-2022 [30, 31, 33-35, 37-39]. The pooled balloon dilatation success rate was 67.07% (95% CI: 55.92%-77.36%; heterogeneity:  $I^2=86.8683\%$ ,  $p<0.05$ ) (Fig 3A). This result needs to be taken with caution and most likely overestimates the efficacy of balloon dilatation. Moreover, two studies on drug coated balloon in recurrent urethral stricture expressed its considerable effect on recurrent urethral stricture with relatively objective functional success rate (67%) and anatomical success rate (74.6%) [26, 27].

In addition, the changes in urinary flow rate, PVR, and IPSS scores of patients are summarized in Table 4. Compared with the preoperative condition, we found that the postoperative maximum urinary flow rate was greatly improved at 3 months (RR=2.6510, 95% CI: 1.0681-4.2338;  $z=3.282$ ,  $p < 0.01$ ;  $I^2=96.5\%$ ,  $p < 0.05$ ), and the significant difference remained at one year postoperatively (RR=1.6637, 95% CI: 1.1837-2.1437;  $z=6.794$ ,  $p < 0.01$ ;  $I^2=78.8\%$ ,  $p < 0.05$ ). The patient's IPSS score and PVR also decreased accordingly. With the extension of follow-up time, the quality of life of the patients remained at a good level, reflecting the long-term effectiveness of balloon dilation.

**Table 2: The clinical characteristics and efficiency of balloon dilatation ( I ).**

| Study                  | Evaluable Patients (n) | Age (average)                | Etiology                                                                                                                                              | Location of the Strictures                                           | Length of Stenosis | Pre-dilated state                                                                                                                                      |
|------------------------|------------------------|------------------------------|-------------------------------------------------------------------------------------------------------------------------------------------------------|----------------------------------------------------------------------|--------------------|--------------------------------------------------------------------------------------------------------------------------------------------------------|
| Virasoro, Ramon et al. | 43                     | 50.7<br>(22.0 - 81.0)        | /                                                                                                                                                     | Anterior urethra                                                     | ≤ 2 cm             | 1-4 prior endoscopic treatments (none within 3 months of enrollment)                                                                                   |
| Elliott, S. P. et al.  | 60 (79): 15 (48)*      | 60.6 ± 16.0 :<br>58.7 ± 15.5 | Iatrogenic (21/78, 26.9%);<br>Idiopathic (42/78, 53.8%);<br>Inflammatory (1/78, 1.3%);<br>Traumatic (14/78, 17.9%);<br>pelvic radiation (9/79, 11.4%) | Anterior urethra                                                     | ≤ 3 cm             | ≥ 2 prior endoscopic treatments                                                                                                                        |
| Beeder, L. A. et al.   | 91                     | 61                           | /                                                                                                                                                     | Anterior urethra<br>(n=75, 82%);<br>posterior urethra<br>(n=16, 18%) | /                  | Most (75/91, 82%) had prior treatment for USD<br>(endoscopic 50/91 (55%), 51/91 (56%)<br>urethroplasty)                                                |
| Alibekov, M. M. et al. | 7                      | 52<br>(47 - 65)              | Idiopathic (4/7, 57.1%);<br>Inflammatory (1/7, 14.3%);<br>Traumatic (2/7, 28.6%)                                                                      | Anterior urethra                                                     | ≤ 1 cm             | All patients had 1 urethral stone. The sizes of the stone ranged from 4 to 9 mm (median - 6 mm)                                                        |
| Yi, Y. A. et al.       | 80                     | /                            | /                                                                                                                                                     | Anterior urethra<br>(n=59, 74%);<br>posterior urethra<br>(n=21, 26%) | ≤ 1.5 cm           | Over 75% of patients had some form of prior stricture treatment, including dilation (34/80, 42.5%), DVIU (19/80, 23.8%), or urethroplasty (48/80, 60%) |

|                          |            |                                |                                                                                                                       |                                                                                 |                                               |                                                                                  |
|--------------------------|------------|--------------------------------|-----------------------------------------------------------------------------------------------------------------------|---------------------------------------------------------------------------------|-----------------------------------------------|----------------------------------------------------------------------------------|
| Kumano, Y. et al.        | 13 : 9     | 71 : 63                        | Iatrogenic (10/13, 76.9%);<br>Idiopathic (3/13, 23.1%)                                                                | Anterior urethra (n=9, 41%);<br>posterior urethra (n=13, 59%)                   | /                                             | /                                                                                |
| Zhou, Y. et al.          | 45         | 46.6<br>(22 - 76)              | Iatrogenic (19/45, 42.2%);<br>Inflammatory (5/45, 11.1%);<br>Traumatic (18/45, 40%);<br>pelvic radiation (3/45, 6.7%) | Anterior urethra (n=36, 80%);<br>posterior urethra (n=9, 20%)                   | ≤ 2 cm                                        | 5 patients had a prior suprapubic cystostomy                                     |
| Yu, S. C. et al.         | 31 : 25    | 49 (32 - 67) :<br>44 (24 - 71) | Iatrogenic (7/31, 22.6%);<br>Idiopathic (1/31, 3.2%);<br>Inflammatory (2/31, 6.5%);<br>Traumatic (21/31, 67.7%);      | Anterior urethra (n=45, 80%);<br>posterior urethra (n=11, 20%)                  | ≤ 1 cm (n=48, 86%) ;<br>> 1 cm (n=8, 14%)     | None received prior endovascular therapy                                         |
| Chhabra, J. S. et al.    | 134 (144)* | 52<br>(18 - 85)                | Iatrogenic (59/144, 41.0%);<br>Idiopathic (84/144, 58.3%);<br>pelvic radiation (1/144, 0.7%)                          | Anterior urethra (n=110, 76%);<br>posterior urethra (n=8, 6%); both (n=26, 18%) | ≤ 1.5 cm (n=130, 90%) ;<br>> 1 cm (n=14, 10%) | /                                                                                |
| Ishii, Gen et al.        | 10         | 70<br>(61 - 75)                | Iatrogenic                                                                                                            | Posterior urethra                                                               | /                                             | All patients had cystourethral anastomotic stricture after radical prostatectomy |
| Mao, D. et al.           | 37 (39)*   | 55<br>(24 - 84)                | /                                                                                                                     | Anterior urethra (n=17, 44%);<br>posterior urethra (n=20, 51%); both (n=2, 5%)  | ≤ 2 cm                                        | /                                                                                |
| Vyas, J. B. et al.       | 120        | 49.86<br>(30 - 85)             | /                                                                                                                     | Anterior urethra (n=114, 95%);<br>posterior urethra (n=6, 5%)                   | ≤ 1.5 cm                                      | /                                                                                |
| Alguersuari, A. et al.   | 65         | 63.17 ± 16.9                   | /                                                                                                                     | Anterior urethra (26.2%); posterior urethra (73.8%)                             | ≤ 2 cm (86.2%) ;<br>> 2 cm (13.8%)            | /                                                                                |
| MacDiarmid, S. A. et al. | 51         | /                              | Iatrogenic (27/51, 52.9%);<br>Idiopathic (11/51, 21.6%);<br>Inflammatory (10/51, 19.6%);<br>Traumatic (3/51, 5.9%)    | Anterior urethra (n=49, 96%);<br>posterior urethra (n=2, 4%)                    | /                                             | /                                                                                |
| Mohammed, S. H. et al.   | 6 (7)*     | 35<br>(16 - 67)                | Iatrogenic (1/6, 16.7%);<br>Idiopathic (2/6, 33.3%);<br>Inflammatory (2/6, 33.3%);<br>Traumatic (1/6, 16.7%)          | Anterior urethra (n=4, 57%);<br>posterior urethra (n=3, 43%)                    | /                                             | /                                                                                |

\* In parentheses are the number of people who were initially assessed at baseline in the study, and outside brackets were the number of people who could be effectively assessed at the end of the follow-up.



**Table 3: The clinical characteristics and efficiency of balloon dilatation ( II ).**

| Study                  | Balloon Types                                                                       | Control         | Definition of Success Rate                                                                                                                                                                     | Reported Success Rate (%) | Follow-up                    |
|------------------------|-------------------------------------------------------------------------------------|-----------------|------------------------------------------------------------------------------------------------------------------------------------------------------------------------------------------------|---------------------------|------------------------------|
| Virasoro, Ramon et al. | Optilume® drug coated balloon (DCB)                                                 | /               | Functional success was defined as $\geq 50\%$ reduction in International Prostate Symptom Score (IPSS) without need for retreatment.                                                           | 67                        | 3 years                      |
| Elliott, S. P. et al.  | Optilume® drug coated balloon (DCB)                                                 | dilation / DVIU | Anatomical success: the proportion of participants in whom the surgeons could atraumatically pass a 16-French flexible cystoscope or a 14-French catheter through the treated area at 6 months | 74.6 : 26.8               | 1 year                       |
| Beeder, L. A. et al.   | 8-cm, 24-French UroMax Ultra™ balloon dilator                                       | /               | Proportion of patients who reported no recurrence of lower urinary tract symptoms or did not need further stricture treatment                                                                  | 50                        | 12 months (3 - 40)           |
| Alibekov, M. M. et al. | /                                                                                   | /               | Proportion of patients without recurrence of urethral stricture after 18 months of dilation                                                                                                    | 85.7                      | 14 months (3 - 24)           |
| Yi, Y. A. et al.       | 8-cm, 24-French UroMax Ultra™ balloon dilator                                       | /               | Proportion of patients with postoperative urethral stricture who did not recur or did not need further stricture treatment                                                                     | 66.3                      | 8.4 months (IQR, 3.9 - 22.5) |
| Kumano, Y. et al.      | Balloon dilation catheter (X-FORCE; BARD Medical, Murray Hill, NJ, USA)             | OIU             | Proportion of patients with no recurrence of stenosis during the follow-up period                                                                                                              | 84 : 22                   | /                            |
| Zhou, Y. et al.        | Balloon catheter (X-Force™, C.R. Bard Inc., USA)                                    | /               | Proportion of patients without further stricture treatment during the follow-up period                                                                                                         | 86.7                      | 6 - 24 months                |
| Yu, S. C. et al.       | 6-cm, 7-French balloon catheter (X-Force™, C.R. Bard Inc., USA)                     | DVIU            | Proportion of patients with postoperative urethral stricture who did not recur or did not need further stricture treatment                                                                     | 35.5                      | 14.75 months (5 - 36)        |
| Chhabra, J. S. et al.  | 8-cm, 24-French urethral Balloon catheter set (Cook Urological, Spencer, Ind., USA) | /               | Proportion of patients without further stricture treatment during the follow-up period                                                                                                         | 84.4                      | 24 months (3 - 52)           |
| Ishii, Gen et al.      | 6-cm, 6-French Balloon catheter, the X Force®                                       | /               | Proportion of patients with no recurrence of stenosis during the follow-up period                                                                                                              | 80                        | 24 months (7 - 67)           |
| Mao, D. et al.         | 24-French Nephrostomy balloon dilation catheter, the X Force®                       | /               | Proportion of patients without further stricture treatment during the follow-up period                                                                                                         | 64.9                      | /                            |

|                          |                                                                                     |   |                                                                                        |      |                    |
|--------------------------|-------------------------------------------------------------------------------------|---|----------------------------------------------------------------------------------------|------|--------------------|
| Vyas, J. B. et al.       | 8-cm, 24-French urethral Balloon catheter set (Cook Urological, Spencer, Ind., USA) | / | Proportion of patients without further stricture treatment during the follow-up period | 68   | 6 months (2 - 60)  |
| Alguersuari, A. et al.   | fluoroscopic- guided balloon dilation                                               | / | Proportion of patients without further stricture treatment during the follow-up period | 69   | /                  |
| MacDiarmid, S. A. et al. | The UrethraMax (4, 6, or 8-cm; 24-French) or a coude tip balloon dilation catheter  | / | Proportion of patients without further stricture treatment during the follow-up period | 55   | 9 months (1 - 16)  |
| Mohammed, S. H. et al.   | Olbert balloon catheter                                                             | / | Proportion of patients without further stricture treatment during the follow-up period | 66.7 | 12 months (6 - 26) |

DVIU, direct vision internal urethrotomy; OIU, optical internal urethrotomy.

**Table 4: Changes in urinary flow rate, PVR, and IPSS scores of patients after balloon dilation. (The following table is continued to the right)**

| Study                         | Location of the Strictures                                                   | Length of Stenosis                         |
|-------------------------------|------------------------------------------------------------------------------|--------------------------------------------|
| Virasoro, Ramon et al. 2022   | Anterior urethra                                                             | ≤ 2 cm                                     |
| Elliott, S. P. et al. 2022    | Anterior urethra                                                             | ≤ 3 cm                                     |
| Zhou, Y. et al. 2016          | Anterior urethra (n=36, 80%); posterior urethra (n=9, 20%)                   | ≤ 2 cm                                     |
| Chhabra, J. S. et al. 2016    | Anterior urethra (n=110, 76%); posterior urethra (n=8, 6%); both (n=26, 18%) | ≤ 1.5 cm (n=130, 90%) ; > 1 cm (n=14, 10%) |
| Vyas, J. B. et al. 2013       | Anterior urethra (n=114, 95%); posterior urethra (n=6, 5%)                   | ≤ 1.5 cm                                   |
| MacDiarmid, S. A. et al. 2000 | Anterior urethra (n=49, 96%); posterior urethra (n=2, 4%)                    | /                                          |

| IPSS              |                  |                  |                  |                  |                  |
|-------------------|------------------|------------------|------------------|------------------|------------------|
| Before surgery    | 3 months         | 6 months         | 1 year           | 2 year           | 3 year           |
| 25.2 ± 4.5 (n=53) | 6.1 ± 7.6 (n=51) | 4.6 ± 5.2 (n=45) | 4.5 ± 3.9 (n=40) | 6.9 ± 7.7 (n=38) | 5.5 ± 6.9 (n=33) |
| 22.0 ± 6.8 (n=79) | 7.4 ± 5.8 (n=74) | 8.3 ± 6.2 (n=71) | 9.0 ± 7.1 (n=67) | /                | /                |
| /                 | /                | /                | /                | /                | /                |

| /                     | /                     | 12.7<br>(n=112)       | 12.6<br>(n=112)       | /                     | /                    |
|-----------------------|-----------------------|-----------------------|-----------------------|-----------------------|----------------------|
| 21.6<br>(n=120)       | 11.4<br>(n=120)       | 12.6<br>(n=120)       | /                     | /                     | /                    |
| /                     | /                     | /                     | /                     | /                     | /                    |
| <b>Qmax (mL/sec)</b>  |                       |                       |                       |                       |                      |
| <b>Before surgery</b> | <b>3 months</b>       | <b>6 months</b>       | <b>1 year</b>         | <b>2 year</b>         | <b>3 year</b>        |
| 5.0 ± 2.6<br>(n=46)   | 22.2 ± 12.5<br>(n=51) | 19.8 ± 10.8<br>(n=45) | 20.1 ± 10.0<br>(n=39) | 17.5 ± 10.4<br>(n=38) | 15.1 ± 8.3<br>(n=33) |
| 7.6 ± 3.4<br>(n=78)   | 18.6 ± 10.9<br>(n=71) | 16.6 ± 8.9<br>(n=69)  | 15.5 ± 9.0<br>(n=65)  | /                     | /                    |
| 5.6 ± 1.4<br>(n=45)   | 19.8 ± 3.9<br>(n=45)  | /                     | /                     | /                     | /                    |
| 5.2 ± 2.7<br>(n=144)  | /                     | 15.4 ± 7.2<br>(n=112) | 12.6 ± 5.7<br>(n=112) | /                     | /                    |
| 5.7<br>(n=120)        | 14.3<br>(n=120)       | 12.7<br>(n=120)       | /                     | /                     | /                    |
| 10.4<br>(n=48)        | 15.3<br>(n=43)        | 17.7<br>(n=27)        | 15.2<br>(n=5)         | /                     | /                    |

| <b>PVR (mL)</b>         |                         |                        |                        |                       |                       |
|-------------------------|-------------------------|------------------------|------------------------|-----------------------|-----------------------|
| <b>Before surgery</b>   | <b>3 months</b>         | <b>6 months</b>        | <b>1 year</b>          | <b>2 year</b>         | <b>3 year</b>         |
| 141.4 ± 105.1<br>(n=43) | 141.4 ± 105.1<br>(n=51) | 30.0 ± 42.8<br>(n=45)  | 24.6 ± 32.1<br>(n=39)  | 45.5 ± 49.5<br>(n=38) | 50.2 ± 62.5<br>(n=33) |
| 109.8 ± 116.9<br>(n=77) | 103.4 ± 134.4<br>(n=70) | 73.1 ± 117.7<br>(n=67) | 94.6 ± 121.8<br>(n=66) | /                     | /                     |
| /                       | /                       | /                      | /                      | /                     | /                     |
| /                       | /                       | /                      | /                      | /                     | /                     |
| 90.2<br>(n=120)         | 34.2<br>(n=120)         | 20.2<br>(n=120)        | /                      | /                     | /                     |
| /                       | /                       | /                      | /                      | /                     | /                     |

1  
2  
3 IPSS, International Prostate Symptom Scores; Qmax, maximum uroflow; PVR,  
4 post-void residual urine volume.  
5  
6

### 7 **3.5 Comparison of balloon dilation with other endoluminal treatments**

8 We conducted a separate analysis of two studies compared with DVIU and optical  
9 internal urethrotomy (OIU), finding no statistically significant difference in efficacy  
10 between conventional balloon dilation and other traditional endoluminal therapy  
11 (RR=1.4754, 95%CI: 0.7306-2.9793; z=1.085, p=0.278; heterogeneity: I<sup>2</sup>=0%,  
12 p=0.351) (Fig 3B). There is insufficient evidence to suggest that balloon dilation is  
13 superior to other traditional endoluminal therapies.  
14  
15  
16

### 17 **3.6 Clinical preference and efficacy influencing factors of balloon dilation**

#### 18 **3.6.1 Etiology**

19 We pooled eight studies of simple balloon dilation that addressed specific etiologies  
20 [28-30, 32, 34-36, 40], involving a total of 307 patients. Iatrogenic urethral strictures  
21 (43.32%, 133/307) and idiopathic urethral strictures (34.20%, 105/307) accounted for  
22 the vast majority. The stenosis caused by trauma and inflammation accounted for  
23 14.66% (45/307) and 6.51% (20/307) respectively. There were also 4 patients  
24 suffering from radiation. Although this is only a one-sided epitome, it follows the  
25 trend that iatrogenic injury may become the main etiology of urethral stricture in  
26 males in the future. The persistence of idiopathic factors such as lichenoid sclerosis is  
27 a serious challenge that has to be overcome.  
28

29 Due to the lack of meticulous subgroup analysis in the included literatures, it is  
30 difficult for us to directly compare the efficacy difference among strictures caused by  
31 different etiologies. The influence of etiology on the efficacy of balloon dilatation  
32 depends primarily on the type of stenotic pathology it creates and the specific stenotic  
33 segment length and location. The essence of balloon dilation is the expansion of  
34 physical properties, which needs to avoid the re fibrosis of scar tissue in the narrow  
35 segment to the greatest extent. Once the process of re-fibrosis progresses, strictures  
36 are highly likely to recur. Therefore, balloon dilation may not perform well for  
37 stenosis with high degree of fibrosis. Lichen sclerosus is the most prominent cause of  
38 idiopathic urethral strictures. The narrow segment pathologic features of lichen  
39 sclerosus include hyperkeratosis or epithelial atrophy, basal cell vacuolar  
40 degeneration, lichenoid lymphocytic infiltration, and upper epithelial sclerosis [43].  
41 This epithelial stromal lesion lesion characterized by squamous atrophy or  
42 hyperplasia is distinct from the fibrotic pathologic characterization of most urethral  
43 strictures. A recent review pooling expert opinion in urology stated dilatation is  
44 unlikely to be a successful long-term solution for lichenoid sclerosing urethral  
45 stricture, potentially triggering longer adverse outcomes [44]. Balloon dilatation of  
46 physical nature is difficult to fundamentally improve the condition of patients with  
47 idiopathic urethral strictures pathogenetically, and its clinical indications require strict  
48 control.  
49  
50  
51  
52  
53  
54  
55  
56  
57  
58

#### 59 **3.6.2 Location of urethral stricture**

We combined 11 studies that identified the location of stenosis [28, 31-40]. The patients with anterior urethral stricture accounted for 74.28% (488/657), the patients with posterior urethral stricture accounted for 21.77% (143/657), and 3.95% (26/657) patients had both strictures. The majority of patients receiving balloon dilatation are patients with anterior urethral stricture, since its high incidence rate.

Moreover, we combined data from two studies that performed subgroup analysis of stricture location [31, 33] and did not find any statistical difference in the efficacy of balloon dilatation between anterior and posterior urethral strictures (RR=0.9568, 95%CI: 0.6618-1.3832, p=0.814) (Fig 4A).

### 3.6.3 Length of urethral stricture

We performed a subgroup analysis of eight simple balloon dilatation studies that were involved in the combination of success rates previously [30, 31, 33-35, 37-39], and the results were shown in Fig 4B. In shorter stenoses ( $\leq 2$ cm), the success rate of balloon dilation was up to 71.58% (95% CI: 61.93%-80.35%), and heterogeneity was also reduced ( $I^2=63.2342\%$ ,  $p < 0.05$ ) (Fig 4B). In a study of patients with anterior urethral strictures of less than 1 cm in length, the success rate was as high as 85.7% [32]. The reduction in heterogeneity of the pooled results suggests that the stenotic segment length is a prognostic factor, and balloon dilatation may have a higher success rate in short segment urethral strictures.

### 3.6.4 Age

We further stratified the previous eight studies [30, 31, 33-35, 37-39] on account of different age groups, the results were shown in Fig 4C. In the age group of 50 to 60 years, the success rate of balloon dilation was 80.79% (95% CI: 74.42%-86.47%). However, when the patients were over 60 years old, the success rate dropped to 58.49% (95% CI: 50.61%-66.17%). Interestingly, the combined success rate was at 65.39% (95% CI: 39.61%-87.22%) in relatively young patients, probably because part of the reported younger patient had a more severe stenosis. The etiology of strictures in elderly patients is often iatrogenic, whereas in younger patients more complex urethral strictures can be caused by relatively specific factors such as trauma and lichenoid sclerosis gonorrhoea. Even though the success rate is somewhat subjective, we can roughly see the decreasing trend of the efficacy of balloon dilation in elderly patients.

### 3.6.5 Prior intervention management

A separate analysis of patients who had received prior endoscopic management (catheter/balloon dilation, direct visual internal urethrotomy) in two studies [31, 33] was performed and we found that balloon dilation had a pooled success rate of 49.51% (95% CI: 39.79%-59.26%) (Fig 4D). In patients with previous surgical intervention, the efficacy of balloon dilation may be diminished. Based on the limited data available in these two studies [31, 33], we compared patients with and without previous urethroplasty, and found no statistical difference in the success rate of simple balloon dilatation (RR=1.1682, 95%CI: 0.6160-2.2153, p=0.634) (Fig 5A). The

1  
2  
3 prevailing clinical view is that repeated endoluminal intervention may render further  
4 endoluminal treatment less effective, but this needs to be confirmed by clinical studies  
5 with larger sample sizes.  
6  
7

### 8 **3.6.6 Other patient status**

9  
10 We performed a more nuanced subgroup analysis of the two studies [31, 33] that  
11 provided some patient baseline details. There was no statistically significant  
12 difference in balloon dilation efficacy between patients with a history of smoking and  
13 non-smoking patients (RR=1.1052, 95%CI: 0.8083-1.5112, p=0.531) (Fig 5B).  
14 Chronic diseases such as coronary artery disease (RR=1.0714, 95%CI: 0.7618-1.5069,  
15 p=0.692), diabetes mellitus (RR=0.9144, 95%CI: 0.6118-1.3666, p=0.662),  
16 hypertension (RR=0.8377, 95%CI: 0.6121-1.1464, p=0.269), and chronic obstructive  
17 pulmonary disease (RR=1.3515, 95%CI: 0.7495-2.4374, p=0.317) also did not show  
18 statistical differences in the efficacy of balloon dilation (Fig 5C-F). Our preliminary  
19 analysis results suggest that patient status such as poor living habits and chronic  
20 diseases may not have a significant impact on the efficacy of balloon dilation.  
21  
22  
23  
24

### 25 **3.7 Intermittent urethral balloon self-dilation**

26 Patient self-balloon dilation is a specific form of balloon dilation, and we also briefly  
27 review its clinical evaluation. Urethral dilation is easy to perform and can be  
28 performed by the patient at home, avoiding repeated hospitalizations and frequent  
29 general anesthesia [45]. A study by Levine, L. A. [46] suggests that adjuvant home  
30 balloon self-dilation may be a potential option for patients at high risk of recurrence.  
31 In this study of 25 evaluable patients, the majority of patients noted that balloon  
32 dilation improved voiding and maintained or improved peak urinary flow rate at an  
33 average of 18.7 months of long-term follow-up. Nonetheless, six patients (19%)  
34 complained of balloon placement discomfort, 3 (10%) noted minor bleeding during  
35 dilation, and 4 (13%) developed urinary tract infections during follow-up. Hennessey,  
36 D. B.'s initial experience with self-expanding balloon dilation in the outpatient setting  
37 was encouraging, with all 11 patients reporting that they were very satisfied or  
38 satisfied with overall outcomes and quality of life [47]. A recent study reported in  
39 2021 stated that the self-urethral balloon dilatation offers patients with complex  
40 strictures, especially those with a history of radiation, an opportunity to avoid surgical  
41 intervention [48].  
42  
43  
44  
45  
46

47 However, due to the imprecision of patient self-balloon dilation, which may cause  
48 complications and even aggravate injury. As early as the last century, scholars have  
49 shown that short-term postoperative self-dilation techniques do not appear to prevent  
50 recurrence of strictures in patients treated with endourethral incisions [49]. A recent  
51 meta-analysis of patient self-dilation also indicated that the quality of evidence for  
52 this approach to reduce the risk of recurrent urethral strictures is very low [50].  
53 Although self-dilation is very convenient and avoids the complications of surgery, it is  
54 not suitable for all patients, and not all patients can master the skills and techniques of  
55 dilation. Self-balloon dilation by the patient needs to be further weighed against  
56 surgery, and well-designed randomized controlled trials are needed to determine  
57  
58  
59  
60

whether this benefit of convenience is sufficient to make this intervention worthwhile.

#### 4. Discussion

With the gradual increase of iatrogenic urethral strictures, the surgeon should choose the appropriate treatment method according to the etiology of the urethral stricture, the location and length of the stricture, and the degree of urethral fibrosis.

Even though there is no clear evidence that the clinical efficacy of balloon dilation is significantly better than that of other endoluminal treatments, balloon dilation still has a large clinical plasticity. The study by Yu, S. C. et al found that the balloon dilation operation time was much shorter than DVIU ( $13.19\pm 2.68$ ) min vs ( $18.44\pm 3.29$ ) min,  $P<0.01$ ) [30], highlighting the operational simplicity of balloon dilation. The main disadvantage of internal urethrotomy is the inability to accurately estimate the depth of scar tissue during the procedure, resulting in imprecise scar tissue incisions. There may also be damage to the corpus cavernosum below the urethra, and vascular disruption in the corpus cavernosum and localized extravasation of urine through mucosal fissures may exacerbate corpus cavernosum fibrosis, eventually leading to recurrence of strictures [30, 51]. Some scholars believe that balloon dilation tends to be performed in less fibrotic cases without urethral cavernous fibrosis, speculating that the role of balloon dilation will not invade the deep urethral membrane, therefore, even if the dilation time is longer, the restenosis rate of balloon dilation is lower than optical internal urethrotomy [29]. The study by Yu, S. C. et al found the same overall stenosis-free survival with balloon dilation compared with DVIU, but most recurrent disease occurred 12 months after initial balloon dilation treatment [30]. In Kumano, Y.'s study, the balloon dilatation group had significantly longer stenosis-free times than optical internal urethrotomy ( $p<0.01$ ), with median (mean) stenosis-free times of 1675 (1673) and 244 (599) days, respectively [29].

The advent and use of drug-coated balloons can reduce inflammation and reduce relapse rates by releasing drugs such as immunosuppressants while expanding. Barbalias, D. et al conducted animal experiments using paclitaxel-coated balloons and found that paclitaxel could break through the urothelial barrier and immediately distribute to the urothelium, submucosa and smooth muscle layers of the normal rabbit urethra after dilation [52]. The drug can penetrate the epithelium and act on the deep urethral tissue, effectively reduce inflammation and inhibit urethral fibrosis. In the recent ROBUST I trial [27], Optilume drug coated balloon (DCB) maintained symptomatic improvement for 3 years after treatment in a highly susceptible population with recurrent urethral strictures. The 43 patients in this trial had a functional success rate of 67%, a retreatment-free rate of 77%, and an improvement in mean IPSS from 25.2 at baseline to 5.5 at 3 years ( $p<0.0001$ ). One-year results from another RCT (ROBUST III trial) [26] showed that Optilume DCB had a significantly higher dissection success rate at 6 months than the DVIU group (75% vs 27%,  $p<0.001$ ). Immediate symptoms and urinary flow rates were significantly improved in both groups, but the effects were significantly more durable in the Optilume DCB group. The United States Food and Drug Administration (FDA) has approved the



1  
2  
3 Optilume Device for the treatment of male urethral strictures [53]. Nevertheless, in  
4 the ROBUST III study [26], the incidence of serious adverse events in the control  
5 group (DVIU / simple dilation) and DCB group was 16.7% and 10.1%, respectively.  
6 The types and incidence of adverse events in the two groups were very matched, but  
7 the incidence of postoperative hematuria and dysuria was higher in the DCB group  
8 than in the control group (11.4% and 2.1% for both event types, respectively).  
9 Besides, beta-irradiation therapy with use of the rhenium-188  
10 mercaptoacetyltriglycine-filled balloon is expected to prevent or delay stenosis  
11 recurrence in patients with recurrent urethral strictures, and the mean treatment  
12 interval increased from 2.2 months before balloon dilation to 10.7 months after  
13 treatment [54]. The design of new balloons such as cutting balloons and the  
14 exploration of some new expansion techniques may be another important direction in  
15 the future [55, 56]. The new type of balloon should meet the biomechanical  
16 requirements to better fit the narrow urethra.

17 On account of the lack of scientific research design, the current literature attempts to  
18 obtain good outcome evaluation data with meticulous follow-up. The use of  
19 endoscopic urethroplasty combined with balloon dilation for traumatic destruction of  
20 the prostatic membranous urethra has been previously reported [58]. Balloon dilation  
21 may provide an intermediate step before repeat dilation, urethrostomy, or  
22 urethroplasty, making it a promising alternative to current endoscopic treatment. The  
23 timing of balloon dilation is critical, and the corresponding sequential therapy  
24 combination is also worthy of further discussion. In addition, population aging and  
25 regional economic development are also factors that affect medical conditions.  
26 Compared with repeated dilation and urethrotomy, balloon dilation has a lower cost  
27 and can improve the efficiency of clinical turnover, and is expected to be further  
28 promoted in developing countries [57, 58].

## 40 **Contribution Statement**

41 Study concept and design: X.L, C.X

42 Acquisition of data: X.L, X.J, C.X

43 Analysis and interpretation of data: X.L, X.J, C.X

44 Drafting of the manuscript: X.L, C.X

45 Critical revision of the manuscript for important intellectual content: X.L, C.X, Z.Z,  
46 T.C, Z.G, J.L

47 Statistical analysis: X.L, X.J

48 Study supervision: J.L

## 53 **Acknowledgement**

54 None.



## Conflict of Interest Statement

The authors have no conflicts of interest to declare.

## Funding Sources

This work was financially supported by the National Natural Science Foundation of China (Grant Nos. 8207032402).

## Statement of Ethics

The outcome of this meta-analysis could improve clinical decision and help to reduce the risk and cost of patients. All patients included in this study have signed informed consent during the course of each trial. And specific methods of assessment in each trial have been illustrated above. This systematic review did not any addition intervention to all included individuals. Thanks to all the patients and researchers included for their contribution to this study.

## Data availability statement

The datasets generated during and/or analysed during the current study are available from the corresponding author on reasonable request.

## References

- [1] Santucci RA, Joyce GF, Wise M. Male urethral stricture disease. *J Urol*. 2007;177:1667-74.
- [2] Verla W, Oosterlinck W, Spinoit AF, Waterloos M. A Comprehensive Review Emphasizing Anatomy, Etiology, Diagnosis, and Treatment of Male Urethral Stricture Disease. *Biomed Res Int*. 2019;2019:9046430.
- [3] Lumen N, Campos-Juanatey F, Greenwell T, Martins FE, Osman NI, Riechardt S, et al. European

1  
2  
3 Association of Urology Guidelines on Urethral Stricture Disease (Part 1): Management of Male  
4 Urethral Stricture Disease. *Eur Urol.* 2021;80:190-200.

5  
6 [4] Stein DM, Thum DJ, Barbagli G, Kulkarni S, Sansalone S, Pardeshi A, et al. A geographic analysis of  
7 male urethral stricture aetiology and location. *BJU Int.* 2013;112:830-4.

8  
9 [5] Cornu JN, Ahyai S, Bachmann A, de la Rosette J, Gilling P, Gratzke C, et al. A Systematic Review and  
10 Meta-analysis of Functional Outcomes and Complications Following Transurethral Procedures for  
11 Lower Urinary Tract Symptoms Resulting from Benign Prostatic Obstruction: An Update. *Eur Urol.*  
12 2015;67:1066-96.

13  
14 [6] Hollingsworth JM, Rogers MA, Krein SL, Hickner A, Kuhn L, Cheng A, et al. Determining the  
15 noninfectious complications of indwelling urethral catheters: a systematic review and meta-analysis.  
16 *Ann Intern Med.* 2013;159:401-10.

17  
18 [7] Lo T, Vanni A, Cronin P. Urethral stricture as a complication of high dose rate brachytherapy for  
19 prostate cancer. *Radiotherapy and Oncology.* 2011;99:S390.

20  
21 [8] Vanni A, Cronin P, Hamawy K, Roth R, Rote A, Leventhal HH, et al. Urethral stricture as a  
22 complication of high-dose-rate brachytherapy for clinically localized prostate cancer. *Brachytherapy.*  
23 2010;9:S93.

24  
25 [9] Wessells H, Angermeier KW, Elliott S, Gonzalez CM, Kodama R, Peterson AC, et al. Male Urethral  
26 Stricture: American Urological Association Guideline. *J Urol.* 2017;197:182-90.

27  
28 [10] Wong SS, Aboumarzouk OM, Narahari R, O'Riordan A, Pickard R. Simple urethral dilatation,  
29 endoscopic urethrotomy, and urethroplasty for urethral stricture disease in adult men. *Cochrane*  
30 *Database Syst Rev.* 2012;12:Cd006934.

31  
32 [11] Russinovich NAE, Lloyd LK, Griggs WP, Jander HP. Balloon dilatation of urethral strictures.  
33 *Urologic Radiology.* 1980;2:33-7.

34  
35 [12] Pinot JJ, Hermanowicz M, Bonnet JL. Dilatation of the urethra by inflatable balloon catheter.  
36 *Nouvelle Presse Medicale.* 1983;12:163-4.

37  
38 [13] Glesy JD, Finn JC, Hermann GD, Kinney TB, Fogarty TJ. Coaxial balloon dilation and calibration of  
39 urethral strictures. *The American Journal of Surgery.* 1984;147:611-4.

40  
41 [14] Nishiyama T, Go H, Takashima A, Kawakami Y, Takeda M, Sato S. Balloon dilatation for entire  
42 urethral stricture. *Urologia Internationalis.* 1991;46:232-4.

43  
44 [15] Hübler J, Solt J. Balloon catheter for the dilatation of the urethra. *Orvosi hetilap.* 1991;132:925-7.

45  
46 [16] Rosa Arias J, Valdivia Uría JG, López López JA, Elizalde Amatria A. Pneumatic dilatation of urethral  
47 stenosis. *Archivos españoles de urología.* 1989;42:147-51.

48  
49 [17] D'Agostino S, Campobasso P, Musi L, Cappellari F, Belloli G. Treatment of urethral stenoses in  
50 children using a balloon catheter. *La Pediatria medica e chirurgica : Medical and surgical pediatrics.*  
51 1989;11:155-9.

52  
53 [18] Perini L, Cavallo A, Perin B, Bigli G. Dilatation of benign urethral stenosis using a balloon  
54 catheter. *La Radiologia medica.* 1988;76:8-10.

55  
56 [19] Acunas B, Acunas G, Gokmen E, Celik L. Balloon dilatation of iatrogenic urethral strictures.  
57 *European Journal of Radiology.* 1988;8:214-6.

58  
59 [20] Xie T, Huang X, Xu Q, Ye H, Yang Q, Wang X. Balloon dilation by B ultrasound monitoring for  
60 treatment of urethral stricture: 5 case reports. *Beijing da xue xue bao Yi xue ban = Journal of Peking*  
*University Health sciences.* 2014;46:657-8.

[21] Gelman J, Liss MA, Cinman NM. Direct vision balloon dilation for the management of urethral  
strictures. *J Endourol.* 2011;25:1249-51; discussion 51.

- 1  
2  
3 [22] Liberati A, Altman DG, Tetzlaff J, Mulrow C, Gøtzsche PC, Ioannidis JP, et al. The PRISMA  
4 statement for reporting systematic reviews and meta-analyses of studies that evaluate healthcare  
5 interventions: explanation and elaboration. *Bmj*. 2009;339:b2700.  
6  
7 [23] Higgins JP, Altman DG, Gøtzsche PC, Jüni P, Moher D, Oxman AD, et al. The Cochrane  
8 Collaboration's tool for assessing risk of bias in randomised trials. *Bmj*. 2011;343:d5928.  
9  
10 [24] Jadad AR, Moore RA, Carroll D, Jenkinson C, Reynolds DJ, Gavaghan DJ, et al. Assessing the quality  
11 of reports of randomized clinical trials: is blinding necessary? *Control Clin Trials*. 1996;17:1-12.  
12  
13 [25] Slim K, Nini E, Forestier D, Kwiatkowski F, Panis Y, Chipponi J. Methodological index for  
14 non-randomized studies (minors): development and validation of a new instrument. *ANZ J Surg*.  
15 2003;73:712-6.  
16  
17 [26] Elliott SP, Coutinho K, Robertson KJ, D'Anna R, Chevli K, Carrier S, et al. One-Year Results for the  
18 ROBUST III Randomized Controlled Trial Evaluating the Optilume® Drug-Coated Balloon for Anterior  
19 Urethral Strictures. *Journal of urology*. 2022;207:866 - 75.  
20  
21 [27] Virasoro R, DeLong JM, Estrella RE, Pichardo M, Rodriguez Lay R, Espino G, et al. A Drug-Coated  
22 Balloon Treatment for Urethral Stricture Disease: Three-Year Results from the ROBUST I Study.  
23 *Research and reports in urology*. 2022;14:177-83.  
24  
25 [28] Mohammed SH, Wirima J. Balloon catheter dilatation of urethral strictures. *AJR American journal*  
26 *of roentgenology*. 1988;150:327-30.  
27  
28 [29] Kumano Y, Kawahara T, Mochizuki T, Takamoto D, Takeshima T, Kuroda S, et al. Management of  
29 urethral stricture: High-pressure balloon dilation versus optical internal urethrotomy. *LUTS: Lower*  
30 *Urinary Tract Symptoms*. 2019;11:O34-O7.  
31  
32 [30] Yu SC, Wu HY, Wang W, Xu LW, Ding GQ, Zhang ZG, et al. High-pressure balloon dilation for male  
33 anterior urethral stricture: single-center experience. *Journal of Zhejiang University: Science B*.  
34 2016;17:722-7.  
35  
36 [31] Beeder LA, Cook GS, Nealon SW, Badkshian S, Sanders SC, Perito DP, et al. Long-Term Experience  
37 with Balloon Dilation for Short Bulbar and Membranous Urethral Strictures: Establishing a Baseline in  
38 the Active Drug Treatment Era. *Journal of Clinical Medicine*. 2022;11.  
39  
40 [32] Alibekov MM, Katibov MI, Skorovarov AS, Gazimagomedov GA, Arbuliev KM, Savzikhanov RT, et  
41 al. The one-stage balloon dilatation with stone extraction for a combination of short urethral stricture  
42 and urethral stone in men. *Vestnik Urologii*. 2021;9:16-24.  
43  
44 [33] Yi YA, Rozanski AT, Shakir NA, Viers BR, Ward EE, Bergeson RL, et al. Balloon dilation performs  
45 poorly as a salvage management strategy for recurrent bulbar urethral strictures following failed  
46 urethroplasty. *Translational Andrology and Urology*. 2020;9:3-9.  
47  
48 [34] Zhou Y, Li G, Yan J, Shen C, Tang G, Xu G. Combination of the ureteral dilation catheter and  
49 balloon catheter under the ureteroscope in the treatment of male urethral stricture. *Zhonghua nan ke*  
50 *xue = National journal of andrology*. 2016;22:42-5.  
51  
52 [35] Chhabra JS, Balaji SS, Singh A, Mishra S, Ganpule AP, Sabnis RB, et al. Urethral Balloon Dilatation:  
53 Factors Affecting Outcomes. *Urologia Internationalis*. 2016;96:427-31.  
54  
55 [36] Ishii G, Naruoka T, Kasai K, Hata K, Omono H, Suzuki M, et al. High pressure balloon dilation for  
56 vesicourethral anastomotic strictures after radical prostatectomy. *BMC urology*. 2015;15:62.  
57  
58 [37] Mao D, Yeqi N, Lu Y, Yijian L, Fangzhi C, Yinhuai W. Urethral dilatation with nephrostomy balloon  
59 dilation catheter for treatment of male patients with urethrostenosis. *Chinese Journal of Andrology*.  
60 2014;28:25-9.  
[38] Vyas JB, Ganpule AP, Muthu V, Sabnis RB, Desai MR. Balloon dilatation for male urethral

- 1  
2  
3 strictures "revisited". *Urology Annals*. 2013;5:245-8.
- 4 [39] Alguersuari A, Palaña P, Criado E, Fortuño JR, Falco-Fages JF. Fluoroscopic-guided balloon dilation  
5 for urethral strictures: A feasible and effective approach for an old, unsolved problem. *CardioVascular*  
6 *and Interventional Radiology*. 2012;35:S279.
- 7 [40] MacDiarmid SA, Harrigan CT, Cottone JL, McIntyre WJ, Johnson DE. Assessment of a new  
8 transurethral balloon dilation catheter in the treatment of urethral stricture disease. *Urology*.  
9 2000;55:408-13.
- 10 [41] Parente A, Angulo JM, Romero RM, Rivas S, Burgos L, Tardáguila A. Management of ureteropelvic  
11 junction obstruction with high-pressure balloon dilatation: long-term outcome in 50 children under 18  
12 months of age. *Urology*. 2013;82:1138-43.
- 13 [42] Kumar P, Nargund VH. Management of post-radical prostatectomy anastomotic stricture by  
14 endoscopic transurethral balloon dilatation. *Scandinavian journal of urology and nephrology*.  
15 2007;41:314-5.
- 16 [43] Liu JS, Walker K, Stein D, Prabhu S, Hofer MD, Han J, et al. Lichen sclerosus and isolated bulbar  
17 urethral stricture disease. *J Urol*. 2014;192:775-9.
- 18 [44] Chung ASJ, Suarez OA. Current treatment of lichen sclerosus and stricture. *World J Urol*.  
19 2020;38:3061-7.
- 20 [45] Searles JM, MacKinnon AE. Home-dilatation of the urethral meatus in boys. *BJU International*,  
21 Supplement. 2004;93:596-7.
- 22 [46] Levine LA, Engebrecht BP. Adjuvant home urethral balloon dilation for the recalcitrant urethral  
23 stricture. *Journal of Urology*. 1997;158:818-21.
- 24 [47] Hennessey DB, Thomas AZ, Forde JC, McDermott TED. Management of recalcitrant urethral  
25 strictures with self-dilatation balloon catheter. *Irish Journal of Medical Science*. 2013;182:227-30.
- 26 [48] Monn MF, Virasoro R, DeLong J, Mc Cammon K. Natural history of patients using self urethral  
27 balloon dilation to manage urethral stricture. *Journal of Urology*. 2021;206:e970-e1.
- 28 [49] Matanhelia SS, Salaman R, John A, Matthews PN. A prospective randomized study of  
29 self-dilatation in the management of urethral strictures. *Journal of the Royal College of Surgeons of*  
30 *Edinburgh*. 1995;40:295-7.
- 31 [50] Ivaz SL, Veeratterapillay R, Jackson MJ, Harding CK, Dorkin TJ, Andrich DE, et al. Intermittent  
32 self-dilatation for urethral stricture disease in males: A systematic review and meta-analysis.  
33 *Neurourol Urodyn*. 2016;35:759-63.
- 34 [51] Isen K, Nalçacıoğlu V. Direct vision internal urethrotomy by using endoscopic scissors. *Int Urol*  
35 *Nephrol*. 2015;47:905-8.
- 36 [52] Barbalias D, Lappas G, Ravazoula P, Liourdi D, Kyriazis I, Liatsikos E, et al. Evaluation of the  
37 Distribution of Paclitaxel after Application of a Paclitaxel-Coated Balloon in the Rabbit Urethra.  
38 *Journal of Endourology*. 2018;32:381-6.
- 39 [53] FDA approves the Optilume urethral drug coated balloon for the treatment of urethral strictures.  
40 *BJU international*. 2022;129:305.
- 41 [54] Shin JH, Song HY, Moon DH, Oh SJ, Kim TH, Lim JO. Rhenium-188 mercaptoacetyltriglycine-filled  
42 balloon dilation in the treatment of recurrent urethral strictures: Initial experience with five patients.  
43 *Journal of Vascular and Interventional Radiology*. 2006;17:1471-7.
- 44 [55] Hosseini J, Fallah-Karkan M, Rahavian A, Soleimanzadeh F, Salimi H, Ghadimi K, et al. Feasibility,  
45 complication and long-term follow-up of the newly nelaton based urethral dilation method,  
46 retrospective study. *American journal of clinical and experimental urology*. 2019;7:378-83.
- 47  
48  
49  
50  
51  
52  
53  
54  
55  
56  
57  
58  
59  
60

1  
2  
3 [56] Yildirim E, Cicek T, Istanbuluoglu O, Ozturk B. Use of cutting balloon in the treatment of urethral  
4 stricture: A novel technique. CardioVascular and Interventional Radiology. 2009;32:525-8.

5  
6 [57] Sur H, Dowson C, Jabbar T, Phillips J, Blacker A. A cost based rationale for redefining the  
7 management of urethral strictures. Journal of Endourology. 2012;26:A391-A2.

8 [58] Greenwell TJ, Castle C, Andrich DE, MacDonald JT, Nicol DL, Mundy AR. Repeat urethrotomy and  
9 dilation for the treatment of urethral stricture are neither clinically effective nor cost-effective.  
10 Journal of Urology. 2004;172:275-7.  
11  
12  
13  
14

## 15 **Figure legends**

16  
17  
18 Fig 1: Flow diagram of study selection.  
19

20  
21 Fig 2: Forest plots showing the safety of balloon dilation. (A) Incidence of infection; (B) Incidence of  
22 urinary retention. CI, confidence interval.  
23  
24

25  
26 Fig 3: Forest plots showing the efficacy of balloon dilation. (A) Success rate of simple balloon dilation;  
27 (B) Balloon dilation (Drug-coated balloons excluded) compared with simple dilation, DVIU, and  
28 optical internal urethrotomy (OIU). CI, confidence interval.  
29  
30

31  
32 Fig 4: Forest plots showing the possible influencing factors of balloon dilation ( I ). (A) Location of  
33 urethral stricture; (B) Length of urethral stricture; (C) Age; (D) Prior endoscopic management. CI,  
34 confidence interval.  
35  
36  
37  
38  
39

40  
41 Fig 5: Forest plots showing the possible influencing factors of balloon dilation ( II ). (A) with and  
42 without previous urethroplasty; (B) History of smoking; (C) Coronary heart disease; (D) Diabetes  
43 mellitus; (E) Hypertension; (F) Chronic obstructive pulmonary disease. CI, confidence interval.  
44  
45  
46  
47  
48  
49  
50  
51  
52  
53  
54  
55  
56  
57  
58  
59  
60

1  
2  
3  
4  
5  
6  
7  
8  
9  
10  
11  
12  
13  
14  
15  
16  
17  
18  
19  
20  
21  
22  
23  
24  
25  
26  
27  
28  
29  
30  
31  
32  
33  
34  
35  
36  
37  
38  
39  
40  
41  
42  
43  
44  
45  
46  
47  
48  
49  
50  
51  
52  
53  
54  
55  
56  
57  
58  
59  
60

For peer review only

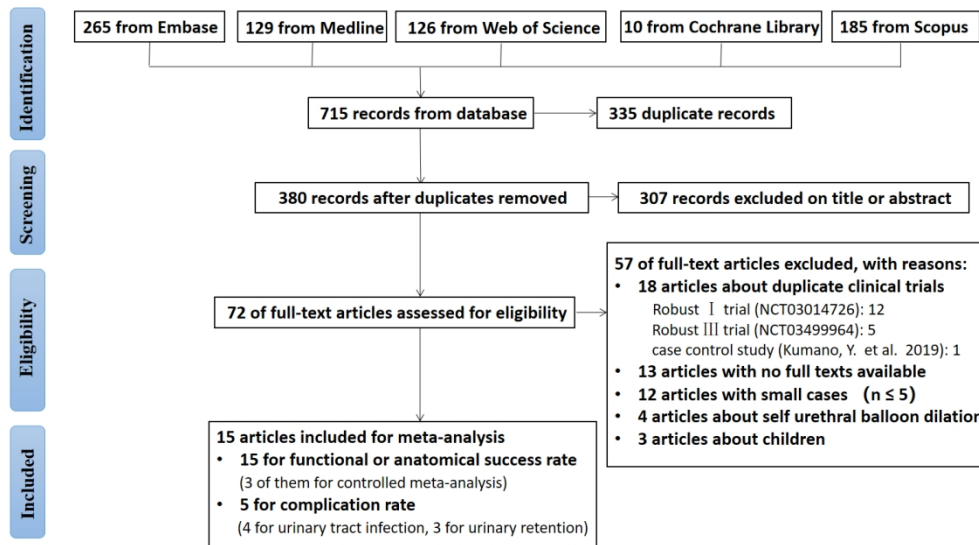

Fig 1: Flow diagram of study selection.

338x190mm (120 x 120 DPI)

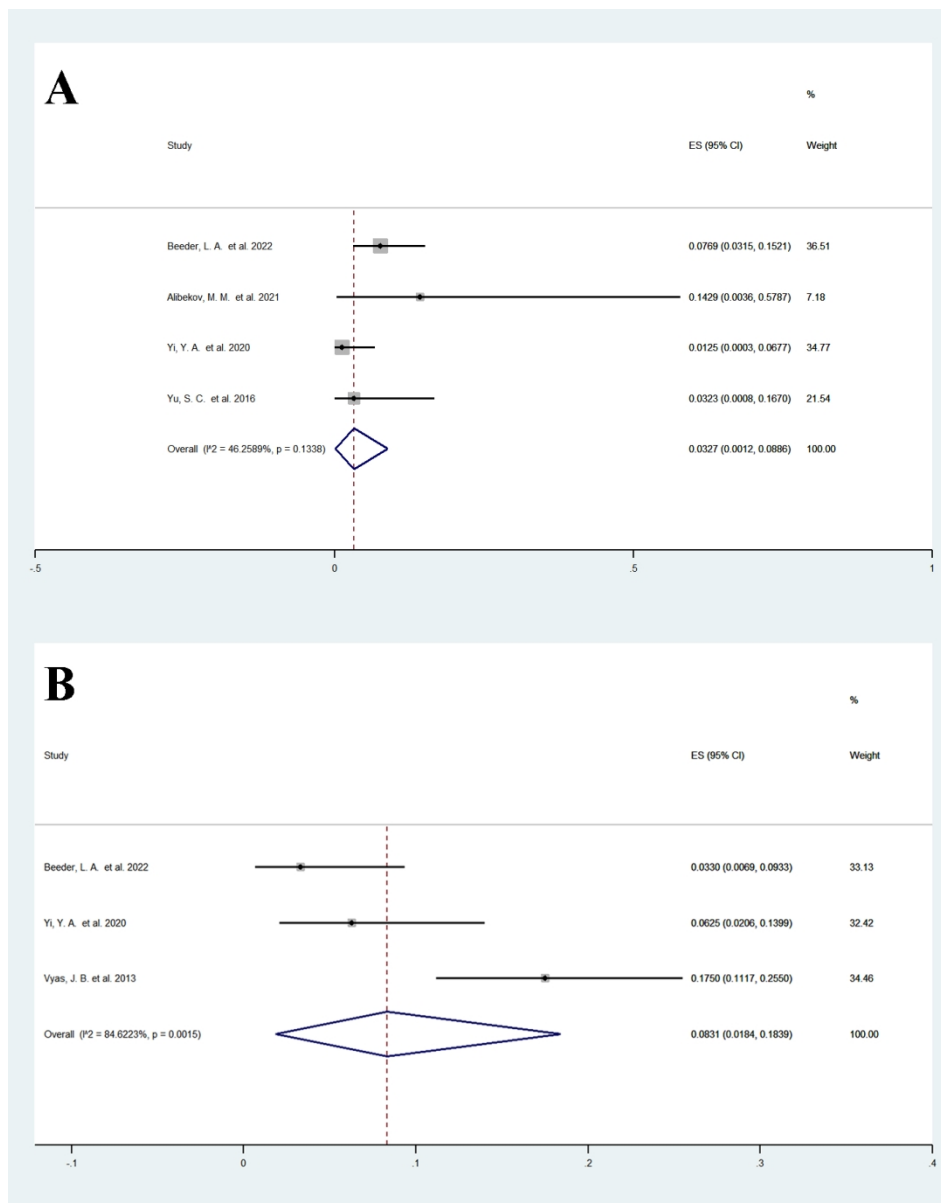

Fig 2: Forest plots showing the safety of balloon dilation. (A) Incidence of infection; (B) Incidence of urinary retention. CI, confidence interval.

504x639mm (72 x 72 DPI)



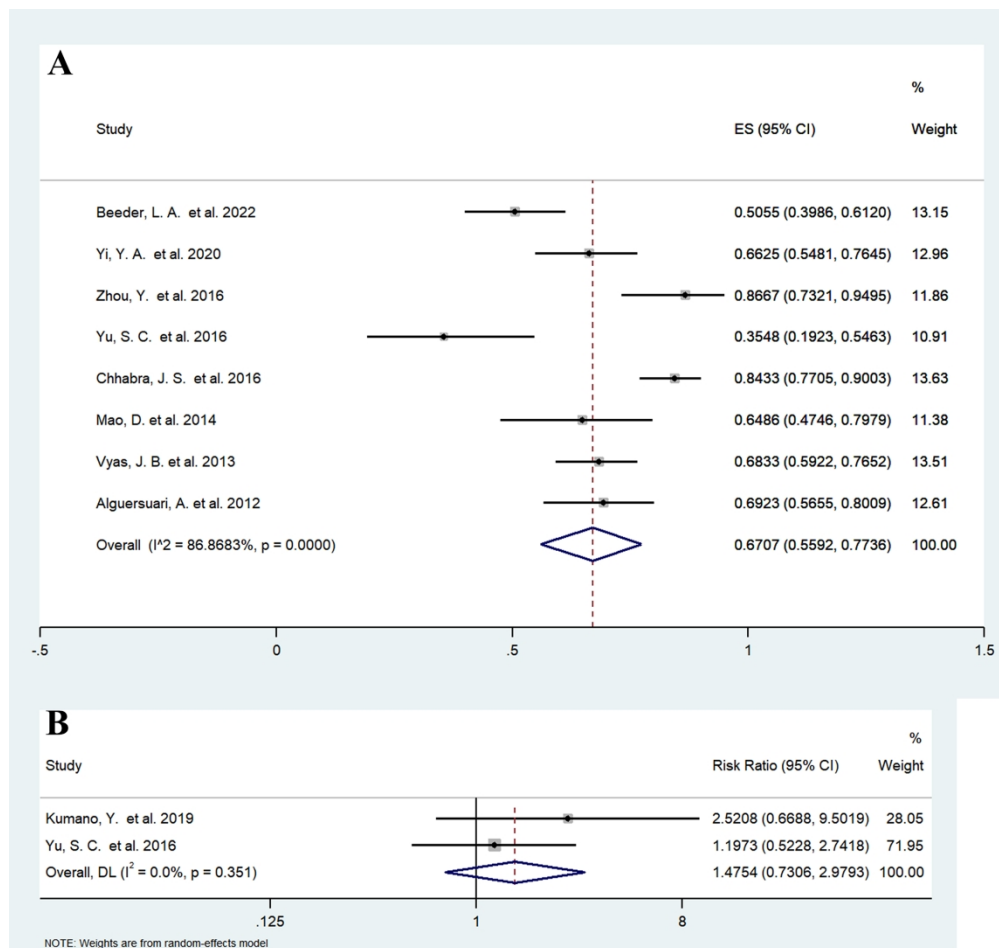

Fig 3: Forest plots showing the efficacy of balloon dilation. (A) Success rate of simple balloon dilation; (B) Balloon dilation (Drug-coated balloons excluded) compared with simple dilation, DVIU, and optical internal urethrotomy (OIU). CI, confidence interval.

209x198mm (300 x 300 DPI)

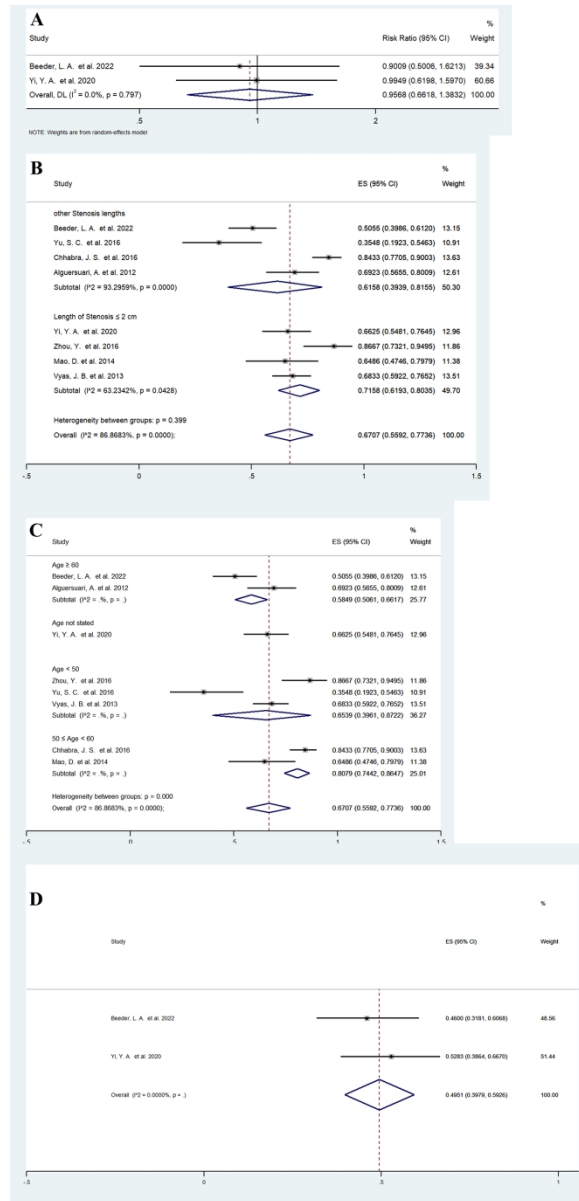

Fig 4: Forest plots showing the possible influencing factors of balloon dilation ( I ). (A) Location of urethral stricture; (B) Length of urethral stricture; (C) Age; (D) Prior endoscopic management. CI, confidence interval.

144x297mm (300 x 300 DPI)

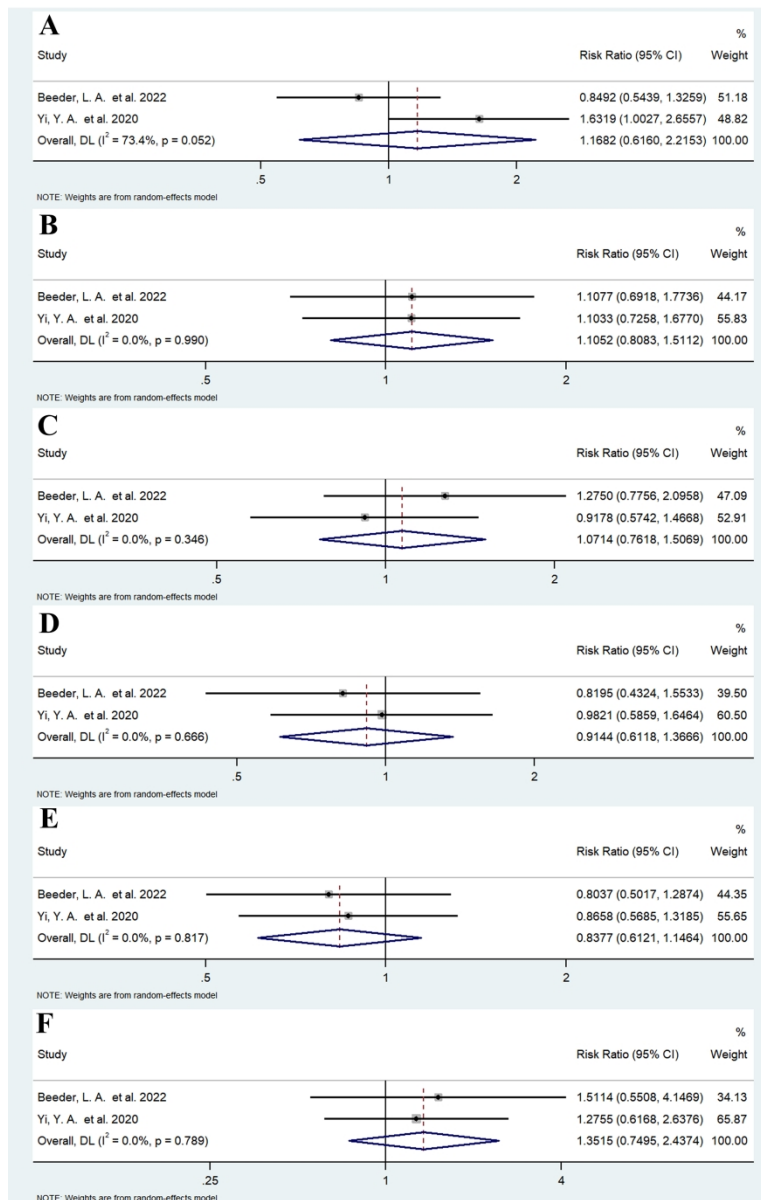

Fig 5: Forest plots showing the possible influencing factors of balloon dilation (II). (A) with and without previous urethroplasty; (B) History of smoking; (C) Coronary heart disease; (D) Diabetes mellitus; (E) Hypertension; (F) Chronic obstructive pulmonary disease. CI, confidence interval.

189x297mm (300 x 300 DPI)

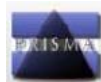

## PRISMA 2020 Checklist

1  
2  
3  
4  
5  
6  
7  
8  
9  
10  
11  
12  
13  
14  
15  
16  
17  
18  
19  
20  
21  
22  
23  
24  
25  
26  
27  
28  
29  
30  
31  
32  
33  
34  
35  
36  
37  
38  
39  
40  
41  
42  
43  
44  
45  
46  
47

| Section and Topic             | Item # | Checklist item                                                                                                                                                                                                                                                                                       | Reported on page # |
|-------------------------------|--------|------------------------------------------------------------------------------------------------------------------------------------------------------------------------------------------------------------------------------------------------------------------------------------------------------|--------------------|
| <b>TITLE</b>                  |        |                                                                                                                                                                                                                                                                                                      |                    |
| Title                         | 1      | Identify the report as a systematic review, meta-analysis, or both.                                                                                                                                                                                                                                  | 1                  |
| <b>ABSTRACT</b>               |        |                                                                                                                                                                                                                                                                                                      |                    |
| Abstract                      | 2      | See the PRISMA 2020 for Abstracts checklist.                                                                                                                                                                                                                                                         | 2                  |
| <b>INTRODUCTION</b>           |        |                                                                                                                                                                                                                                                                                                      |                    |
| Rationale                     | 3      | Describe the rationale for the review in the context of existing knowledge.                                                                                                                                                                                                                          | 3                  |
| Objectives                    | 4      | Provide an explicit statement of the objective(s) or question(s) the review addresses.                                                                                                                                                                                                               | 3                  |
| <b>METHODS</b>                |        |                                                                                                                                                                                                                                                                                                      |                    |
| Eligibility criteria          | 5      | Specify the inclusion and exclusion criteria for the review and how studies were grouped for the syntheses.                                                                                                                                                                                          | 4                  |
| Information sources           | 6      | Specify all databases, registers, websites, organisations, reference lists and other sources searched or consulted to identify studies. Specify the date when each source was last searched or consulted.                                                                                            | 4                  |
| Search strategy               | 7      | Present the full search strategies for all databases, registers and websites, including any filters and limits used.                                                                                                                                                                                 | 4                  |
| Selection process             | 8      | Specify the methods used to decide whether a study met the inclusion criteria of the review, including how many reviewers screened each record and each report retrieved, whether they worked independently, and if applicable, details of automation tools used in the process.                     | 4                  |
| Data collection process       | 9      | Specify the methods used to collect data from reports, including how many reviewers collected data from each report, whether they worked independently, any processes for obtaining or confirming data from study investigators, and if applicable, details of automation tools used in the process. | 4                  |
| Data items                    | 10a    | List and define all outcomes for which data were sought. Specify whether all results that were compatible with each outcome domain in each study were sought (e.g. for all measures, time points, analyses), and if not, the methods used to decide which results to collect.                        | 4                  |
|                               | 10b    | List and define all other variables for which data were sought (e.g. participant and intervention characteristics, funding sources). Describe any assumptions made about any missing or unclear information.                                                                                         | 4                  |
| Study risk of bias assessment | 11     | Specify the methods used to assess risk of bias in the included studies, including details of the tool(s) used, how many reviewers assessed each study and whether they worked independently, and if applicable, details of automation tools used in the process.                                    | 4                  |
| Effect measures               | 12     | Specify for each outcome the effect measure(s) (e.g. risk ratio, mean difference) used in the synthesis or presentation of results.                                                                                                                                                                  | 4                  |
| Synthesis methods             | 13a    | Describe the processes used to decide which studies were eligible for each synthesis (e.g. tabulating the study intervention characteristics and comparing against the planned groups for each synthesis (item #5)).                                                                                 | 4, 5               |
|                               | 13b    | Describe any methods required to prepare the data for presentation or synthesis, such as handling of missing summary statistics, or data conversions.                                                                                                                                                | 4, 5               |
|                               | 13c    | Describe any methods used to tabulate or visually display results of individual studies and syntheses.                                                                                                                                                                                               | 4, 5               |
|                               | 13d    | Describe any methods used to synthesize results and provide a rationale for the choice(s). If meta-analysis was performed, describe the model(s), method(s) to identify the presence and extent of statistical heterogeneity, and software package(s) used.                                          | 4, 5               |
|                               | 13e    | Describe any methods used to explore possible causes of heterogeneity among study results (e.g. subgroup analysis, meta-regression).                                                                                                                                                                 | 4, 5               |
|                               | 13f    | Describe any sensitivity analyses conducted to assess robustness of the synthesized results.                                                                                                                                                                                                         | NA                 |
| Reporting bias assessment     | 14     | Describe any methods used to assess risk of bias due to missing results in a synthesis (arising from reporting biases).                                                                                                                                                                              | 4                  |
| Certainty                     | 15     | Describe any methods used to assess certainty (or confidence) in the body of evidence for an outcome.                                                                                                                                                                                                | 4                  |

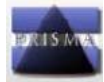

## PRISMA 2020 Checklist

1  
2  
3  
4  
5  
6  
7  
8  
9  
10  
11  
12  
13  
14  
15  
16  
17  
18  
19  
20  
21  
22  
23  
24  
25  
26  
27  
28  
29  
30  
31  
32  
33  
34  
35  
36  
37  
38  
39  
40  
41  
42  
43  
44  
45  
46  
47

| Section and Topic                              | Item # | Checklist item                                                                                                                                                                                                                                                                       | Reported on page # |
|------------------------------------------------|--------|--------------------------------------------------------------------------------------------------------------------------------------------------------------------------------------------------------------------------------------------------------------------------------------|--------------------|
| assessment                                     |        |                                                                                                                                                                                                                                                                                      |                    |
| <b>RESULTS</b>                                 |        |                                                                                                                                                                                                                                                                                      |                    |
| Study selection                                | 16a    | Describe the results of the search and selection process, from the number of records identified in the search to the number of studies included in the review, ideally using a flow diagram.                                                                                         | 5                  |
|                                                | 16b    | Cite studies that might appear to meet the inclusion criteria, but which were excluded, and explain why they were excluded.                                                                                                                                                          | 5                  |
| Study characteristics                          | 17     | Cite each included study and present its characteristics.                                                                                                                                                                                                                            | 5                  |
| Risk of bias in studies                        | 18     | Present assessments of risk of bias for each included study.                                                                                                                                                                                                                         | 5                  |
| Results of individual studies                  | 19     | For all outcomes, present, for each study: (a) summary statistics for each group (where appropriate) and (b) an effect estimate and its precision (e.g. confidence/credible interval), ideally using structured tables or plots.                                                     | 6, 7, 8, 9         |
| Results of syntheses                           | 20a    | For each synthesis, briefly summarise the characteristics and risk of bias among contributing studies.                                                                                                                                                                               | 6, 7, 8, 9         |
|                                                | 20b    | Present results of all statistical syntheses conducted. If meta-analysis was done, present for each the summary estimate and its precision (e.g. confidence/credible interval) and measures of statistical heterogeneity. If comparing groups, describe the direction of the effect. | 6, 7, 8, 9         |
|                                                | 20c    | Present results of all investigations of possible causes of heterogeneity among study results.                                                                                                                                                                                       | 6, 7, 8, 9         |
|                                                | 20d    | Present results of all sensitivity analyses conducted to assess the robustness of the synthesized results.                                                                                                                                                                           | NA                 |
| Reporting biases                               | 21     | Present assessments of risk of bias due to missing results (arising from reporting biases) for each synthesis assessed.                                                                                                                                                              | 6, 7, 8, 9         |
| Certainty of evidence                          | 22     | Present assessments of certainty (or confidence) in the body of evidence for each outcome assessed.                                                                                                                                                                                  | 6, 7, 8, 9         |
| <b>DISCUSSION</b>                              |        |                                                                                                                                                                                                                                                                                      |                    |
| Discussion                                     | 23a    | Provide a general interpretation of the results in the context of other evidence.                                                                                                                                                                                                    | 10                 |
|                                                | 23b    | Discuss any limitations of the evidence included in the review.                                                                                                                                                                                                                      | 10                 |
|                                                | 23c    | Discuss any limitations of the review processes used.                                                                                                                                                                                                                                | 11                 |
|                                                | 23d    | Discuss implications of the results for practice, policy, and future research.                                                                                                                                                                                                       | 10, 11             |
| <b>OTHER INFORMATION</b>                       |        |                                                                                                                                                                                                                                                                                      |                    |
| Registration and protocol                      | 24a    | Provide registration information for the review, including register name and registration number, or state that the review was not registered.                                                                                                                                       | 2, 4               |
|                                                | 24b    | Indicate where the review protocol can be accessed, or state that a protocol was not prepared.                                                                                                                                                                                       | 2, 4               |
|                                                | 24c    | Describe and explain any amendments to information provided at registration or in the protocol.                                                                                                                                                                                      | NA                 |
| Support                                        | 25     | Describe sources of financial or non-financial support for the review, and the role of the funders or sponsors in the review.                                                                                                                                                        | 12                 |
| Competing interests                            | 26     | Declare any competing interests of review authors.                                                                                                                                                                                                                                   | 11                 |
| Availability of data, code and other materials | 27     | Report which of the following are publicly available and where they can be found: template data collection forms; data extracted from included studies; data used for all analyses; analytic code; any other materials used in the review.                                           | 12                 |

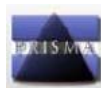

## PRISMA 2020 Checklist

10.1136/bmj.n71

For more information, visit: <http://www.prisma-statement.org/>

For peer review only

1  
2  
3  
4  
5  
6  
7  
8  
9  
10  
11  
12  
13  
14  
15  
16  
17  
18  
19  
20  
21  
22  
23  
24  
25  
26  
27  
28  
29  
30  
31  
32  
33  
34  
35  
36  
37  
38  
39  
40  
41  
42  
43  
44  
45  
46  
47

# BMJ Open

## Balloon dilation for the treatment of male urethral strictures: A Systematic Review and Meta-analysis

|                                 |                                                                                                                                                                                                                                                                                                                                                                                                                                                                                                                                                                                                                                                                                                                                                                                                          |
|---------------------------------|----------------------------------------------------------------------------------------------------------------------------------------------------------------------------------------------------------------------------------------------------------------------------------------------------------------------------------------------------------------------------------------------------------------------------------------------------------------------------------------------------------------------------------------------------------------------------------------------------------------------------------------------------------------------------------------------------------------------------------------------------------------------------------------------------------|
| Journal:                        | <i>BMJ Open</i>                                                                                                                                                                                                                                                                                                                                                                                                                                                                                                                                                                                                                                                                                                                                                                                          |
| Manuscript ID                   | bmjopen-2023-071923.R1                                                                                                                                                                                                                                                                                                                                                                                                                                                                                                                                                                                                                                                                                                                                                                                   |
| Article Type:                   | Original research                                                                                                                                                                                                                                                                                                                                                                                                                                                                                                                                                                                                                                                                                                                                                                                        |
| Date Submitted by the Author:   | 06-Nov-2023                                                                                                                                                                                                                                                                                                                                                                                                                                                                                                                                                                                                                                                                                                                                                                                              |
| Complete List of Authors:       | Li, Xiaoyu; Peking University First Hospital Department of Urology; Peking University Institute of Urology<br>Xu, Chunru; Peking University First Hospital, Department of Urology; Peking University, Institute of Urology<br>Ji, Xing; Peking University First Hospital Department of Urology; Peking University Institute of Urology<br>Zhu, Zhenpeng; Peking University First Hospital, Department of Urology; Peking University, Institute of Urology<br>Cai, Tianyu; Peking University First Hospital, Department of Urology; Peking University, Institute of Urology<br>Guo, Zhenke; Peking University First Hospital Department of Urology; Peking University Institute of Urology<br>Lin, Jian; Peking University First Hospital, Department of Urology; Peking University, Institute of Urology |
| <b>Primary Subject Heading</b>: | Urology                                                                                                                                                                                                                                                                                                                                                                                                                                                                                                                                                                                                                                                                                                                                                                                                  |
| Secondary Subject Heading:      | Urology                                                                                                                                                                                                                                                                                                                                                                                                                                                                                                                                                                                                                                                                                                                                                                                                  |
| Keywords:                       | UROLOGY, Adult urology < UROLOGY, Kidney & urinary tract disorders < UROLOGY                                                                                                                                                                                                                                                                                                                                                                                                                                                                                                                                                                                                                                                                                                                             |
|                                 |                                                                                                                                                                                                                                                                                                                                                                                                                                                                                                                                                                                                                                                                                                                                                                                                          |

SCHOLARONE™  
Manuscripts



I, the Submitting Author has the right to grant and does grant on behalf of all authors of the Work (as defined in the below author licence), an exclusive licence and/or a non-exclusive licence for contributions from authors who are: i) UK Crown employees; ii) where BMJ has agreed a CC-BY licence shall apply, and/or iii) in accordance with the terms applicable for US Federal Government officers or employees acting as part of their official duties; on a worldwide, perpetual, irrevocable, royalty-free basis to BMJ Publishing Group Ltd ("BMJ") its licensees and where the relevant Journal is co-owned by BMJ to the co-owners of the Journal, to publish the Work in this journal and any other BMJ products and to exploit all rights, as set out in our [licence](#).

The Submitting Author accepts and understands that any supply made under these terms is made by BMJ to the Submitting Author unless you are acting as an employee on behalf of your employer or a postgraduate student of an affiliated institution which is paying any applicable article publishing charge ("APC") for Open Access articles. Where the Submitting Author wishes to make the Work available on an Open Access basis (and intends to pay the relevant APC), the terms of reuse of such Open Access shall be governed by a Creative Commons licence – details of these licences and which [Creative Commons](#) licence will apply to this Work are set out in our licence referred to above.

Other than as permitted in any relevant BMJ Author's Self Archiving Policies, I confirm this Work has not been accepted for publication elsewhere, is not being considered for publication elsewhere and does not duplicate material already published. I confirm all authors consent to publication of this Work and authorise the granting of this licence.



1  
2  
3  
4 **Balloon dilation for the treatment of male urethral strictures: A**  
5  
6 **Systematic Review and Meta-analysis**  
7  
8  
9  
10  
11  
12  
13  
14  
15

16 **Xiaoyu Li<sup>1,2,3</sup>, Chunru Xu<sup>1,2,3</sup>, Xing Ji<sup>1,2,3</sup>, Zhenpeng Zhu<sup>1,2,3</sup>, Tianyu Cai<sup>1,2,3</sup>,**  
17 **Zhenke Guo<sup>1,2,3</sup>, Jian Lin<sup>1,2,3\*</sup>**  
18

19 1. Department of Urology, Peking University First Hospital, Beijing 100034, China;

20 2. Institute of Urology, Peking University, Beijing 100034, China;

21 3. National Urological Cancer Center, Beijing, 100034, China  
22

23 \*. Correspondence: **Jian Lin, M.D.** (linjianbj@163.com); Department of Urology,  
24 Peking University First Hospital; Institute of Urology, Peking University, National  
25 Urological Cancer Center, Beijing. No. 8, Street Xishiku, District Xicheng, Beijing,  
26 China, 100034.  
27  
28  
29  
30  
31  
32  
33  
34  
35  
36  
37  
38  
39  
40  
41  
42  
43  
44  
45  
46  
47  
48  
49  
50  
51  
52  
53  
54  
55  
56  
57  
58  
59  
60

## Abstract

**Objective:** The minimally invasive endoluminal treatment of urethral strictures has been a topic of concern for decades. The aim of this study is to review and discuss the safety, efficacy and influencing factors of balloon dilation for male urethral stricture.

**Design:** Systematic review and meta-analysis.

**PROSPERO registration number:** CRD42022334403.

**Data sources:** Embase, Medline, Web of Science, Cochrane Library and Scopus were searched for publications before July 17, 2022.

**Study selection:** Two independent researchers screened and assessed the results, and all clinical studies on balloon dilation for the treatment of urethral strictures in men were included.

**Data extraction and synthesis:** Success rate, rate of adverse events, International Prostate Symptom Scores (IPSS), maximum uroflow (Qmax) and post-void residual urine volume (PVR) were the main outcomes. Stata 14.0 was used for statistical analysis.

**Results:** 15 studies with 715 patients were finally included in this systematic review. Pooled results of eight studies showed that the reported success rate of simple balloon dilation for male urethral strictures was 67.07% (95% CI: 55.92%-77.36%). The maximum urinary flow rate at 3 months (RR=2.6510, 95% CI: 1.0681-4.2338,  $p < 0.01$ ) and the maximum urinary flow rate at one year (RR=1.6637, 95% CI: 1.1837-2.1437,  $p < 0.05$ ) were significantly changed after dilation. There is insufficient evidence to suggest that balloon dilation is superior to optical internal urethrotomy (OIU) and direct visual internal urethrotomy (DVIU) (RR=1.4754, 95%CI: 0.7306-2.9793,  $p=0.278$ ).

**Conclusion:** Balloon dilatation may be an important intermediate choice for the treatment of male urethral stricture. The etiology, location, length, previous treatment and other comprehensive factors of urethral stricture may be associated with the efficacy of balloon dilation.

**Key words:** Balloon dilation, urethral stricture, systematic review, meta-analysis

### Strengths and limitations of this study

- This study systematically reviewed the principle, safety, and efficacy of balloon dilatation, and also describes intermittent urethral balloon self-dilation.
- We provide a comprehensive analysis of factors such as etiology, stricture location, stricture length, and prior intervention management, and discuss clinical directions for balloon dilation.
- The quality of the included studies was relatively low and there is a considerable risk of bias.
- Most of the included studies are retrospective observational studies that lack valid controls, and the results need to be treated with caution.

## 1. Introduction

As an ancient disease relatively common in men, urethral stricture refers to any abnormal narrowing of the anterior or posterior urethra. In some susceptible populations, the incidence of male urethral stricture disease is as high as 0.6%, with more than 5,000 hospitalizations per year [1]. The most typical symptoms of patients are weakened urine flow and even urinary retention, which seriously affects the quality of life [2]. The etiology of urethral stricture is complex, including trauma, infection, iatrogenic, lichen sclerosus, idiopathic, etc. Iatrogenic urethral injury is the most common cause in resource-rich countries, whereas infections and trauma are more common in developing countries [3, 4]. With the continuous development of medical technology, the rapid increase in the incidence of iatrogenic urethral stricture is an urgent problem to be solved. Catheterization, transurethral manipulation, prostate surgery, radiotherapy, and chemotherapy can all cause irreversible stricture damage to the urethra [5-8].

Although urethroplasty has been recognized as the curative treatment for urethral strictures, dilation and direct visual internal urethrotomy (DVIU) are still widely used and effective for single bulbar urethral strictures < 2 cm (especially < 1 cm) with the success rate of 35-70 % [3, 9]. There is currently a lack of evidence to evaluate whether dilation or DVIU is more effective, so both have the same therapeutic indications [10].

Balloon dilation is a special type of dilation that has a long history of treating urethral strictures in men. Russinovich, N. A. E. et al were the first to report preliminary results of 7 cases of male urethral strictures treated with balloon dilation in 1980, which was painless compared to traditional dilation methods and associated mucosal and periurethral injury [11]. Subsequently, Pinot, J. J. dilated the urethra of 25 patients using an inflatable balloon catheter, which included atraumatic catheterization through a vascular catheter under urethoscopy, followed by inflation of the balloon catheter into a flexible guide [12]. The dilation was controlled by voiding urethrography and was much less uncomfortable than conventional urethral dilation, with recurrence in only 3 of 25 patients. Immediately, Glesy, J. D. designed a new coaxial balloon dilator for the treatment of urethral stricture, and pointed out that the balloon dilator can expand slowly and gradually, which is better than the traditional rapid and sudden expansion [13]. More studies have shown that balloon dilation produces minimal trauma and immediate symptom relief, with less patient discomfort and a low complication rate [14-19]. Since angiography has a certain degree of radioactivity, B-ultrasound has been used in the control of balloon dilation, and good clinical results have been initially achieved [20]. Further research found that direct visually controlled balloon dilation under cystoscopy can gently dilate the urethra with higher safety and efficacy [21].

Although balloon dilation is a well-tolerated minimally invasive endoluminal surgical procedure widely used in practice, its clinical significance has not been systematically and comprehensively reviewed. Our objective was to assess the efficacy and safety of balloon dilation and its associated influencing factors.

## 2. Materials and methods

### 2.1 Search strategy

This study followed the guidelines of the PRISMA statement [22] (Supplementary Table 1), and the specific protocol was registered on PROSPERO with the registration number CRD42022334403. Performing with Medical Subject Headings and free text terms, we searched the relevant records published prior to July 17, 2022 in the following databases: Medline, Embase, Cochrane Library, Web of Science and Scopus. The search strategy is shown in Supplementary File.

### 2.2 Eligibility criteria

Two researchers (X.L. and C.X.) screened and assessed the search results independently. The inclusion criteria included: (1) male patients diagnosed as urethral strictures; (2) balloon dilation was applied as the main intervention, not including patient self-dilation; (3) clinical studies about patients, retrospective or prospective; (4) report of the success rate and the rate of adverse events.

Conference abstracts were eligible for inclusion if they reported sufficient outcome data. If several articles were all related to the same study, the most recent publication with the most complete data was included in the systematic review. The consensus was finally reached through consultation and discussion in the event of any disagreement and differences between the two researchers.

### 2.3 Quality assessment

According to the type of study, the quality of included studies was independently assessed by two researchers (X.L. and C.X.). All observational studies were assessed using the Newcastle-Ottawa Scale (NOS) in terms of population selection, comparability, and outcome evaluation [23]. Randomized controlled trial (RCT) studies were assessed using the Jadad Quality Scale, and articles with the score  $>3$  were considered as high-quality research [24]. For single-arm clinical trials, the first 8 items of the Methodological Index for Non-randomized Studies (MINORS) scale were used for assessment [25]. ROBINS-I tool was used to further assess the risk of bias in non-randomized controlled trial studies [26].

### 2.4 Data extraction

We extracted data on success rate, rate of adverse events, International Prostate Symptom Scores (IPSS), maximum uroflow ( $Q_{max}$ , mL/sec) and post-void residual urine volume (PVR). When disagreements arise, a third reviewer will participate in discussions and mediate to reach a consensus.

### 2.5 Statistics analysis

Stata 14.0 (StataCorp, USA) was applied for statistical analysis, reporting success rate and adverse effects rate as proportions.  $I^2$  index was used to test the between-study heterogeneity. When  $I^2 > 50\%$ , it was considered significant heterogeneity and the

1  
2  
3 random effects model was used for pooled analysis, otherwise less heterogeneity was  
4 considered and the fixed effects model was used. By excluding any single study one  
5 by one, we performed a sensitivity analysis of balloon dilation success rate to assess  
6 the stability and reliability of the pooled result. Subgroup analyses were performed  
7 according to the results of meta-regression models.  
8  
9

## 10 **2.6 Patient and public involvement**

11 None.  
12  
13  
14

## 15 **3. Results**

### 16 **3.1 Study selection**

17 The flowchart of the study retrieval process is shown in Figure 1. 15 studies were  
18 included for systematic review with a total of 842 patients. Table 1 and Table 2  
19 present the main characteristics of the included studies. Of these, there are 1  
20 randomized controlled trial (RCT) [27], 2 single-arm clinical trials [28, 29], 2  
21 case-control studies [30, 31], and 10 retrospective case studies [32-41].  
22  
23  
24  
25

### 26 **3.2 Quality analysis and risk of bias**

27 We evaluated the quality of the 15 studies included in the systematic review, and the  
28 results are presented in Supplementary Table 2. Most of the current studies in this  
29 area are retrospective, with inadequate study designs and a lack of valid controls.  
30  
31

32 We further conducted a bias analysis of 14 non-randomized controlled trial studies  
33 using the ROBINS-I tool, and the evaluation criteria and results are shown in  
34 Supplementary Table 3. Since the operation is often influenced by the subjective  
35 preferences of the surgeons and most of the included studies are retrospective case  
36 studies, unavoidable selection bias is one of the most prominent issues. Selection bias  
37 is exacerbated in some small-sample studies of patients with specific comorbid  
38 conditions, such as coexisting urinary calculi. Some confounding factors such as age,  
39 body mass index, etiology, location of the stricture, length of stricture, prior  
40 intervention management, and others like patient baseline physical condition are  
41 present in most studies. Some of these confounding factors have not been  
42 appropriately controlled for in a multivariable-adjusted analysis. Some outcome  
43 measures of balloon dilation are subjective, and researchers may also exaggerate the  
44 efficacy of the balloon in order to publicize its advantages. Moreover, a funnel plot of  
45 eight studies included for the evaluation of conventional balloon dilation success rate  
46 was performed, and there is no evidence of publication bias (Egger test:  $t=-2.42$ ,  
47  $p=0.052>0.05$ ) (Supplementary Figure 1). In addition, due to the small sample size of  
48 some of the included studies, there are certain limitations in reflecting the overall  
49 clinical situation.  
50  
51  
52  
53  
54  
55

### 56 **3.3 The principle of balloon dilation**

57 The principle of balloon expansion is to apply radial force along the balloon span at  
58 the stricture. While the principle of traditional optical internal urethrotomy is to  
59  
60

1  
2  
3 achieve epithelial regeneration by incising scar tissue. Compared with the parallel  
4 force brought by traditional rigid dilation, balloon dilation has less shear force and  
5 less trauma, which can reduce the risk of cavernous fibrosis and cause less discomfort  
6 [31, 42, 43]. Balloon dilation can also make the fibrous scar in the stricture more  
7 evenly fractured, presenting a 360° annular expansion, thereby increasing the inner  
8 diameter of the stenotic segment, and during the balloon dilation process, the urethral  
9 pressure gradually increases, and the expansion is slow and gentle, so as to avoid  
10 blood vessels due to violence [13]. Squeeze bleeding has the advantage of one-time  
11 expansion. In addition, the smooth balloon can avoid normal urethral mucosal  
12 damage.  
13  
14  
15  
16

### 17 **3.4 Safety assessment and incidence of adverse events**

18 Urinary tract infection, urinary retention and postoperative hematuria and dysuria are  
19 the main complications of balloon dilation. Therefore, strict aseptic and standardized  
20 operations are required during the surgical operation to prevent and avoid the  
21 occurrence of adverse events as much as possible.  
22

23 We performed a pooled analysis of reported adverse event rates for urinary tract  
24 infection and urinary retention. The pooled incidence of infection in patients after  
25 balloon dilation is 3.27% (95% CI: 1.2%-8.86%; heterogeneity:  $I^2=46.2589\%$ ,  $p=$   
26  $0.1338$ ) (Supplementary Figure 2A). While, the pooled incidence of urinary retention  
27 was 8.31% (95% CI: 1.84%-18.39%; heterogeneity:  $I^2=84.6223\%$ ,  $p<0.05$ )  
28 (Supplementary Figure 2B). Urinary tract infection is the most common complication  
29 within 30 days of balloon dilation, and some patients require antibiotic treatment [32].  
30 Some patients also have transient hematuria after surgery, but no further treatment  
31 such as blood transfusion is required [31, 32]. Furthermore, Yu, S. C.'s study also  
32 found that the incidence of major postoperative complications such as urethral  
33 bleeding and urinary tract infection in the balloon dilation group was lower than that  
34 in the DVIU group (urethral bleeding: 2/31 vs. 8/25,  $P=0.017$ ; UTI: 1/31 vs. 6/25  
35  $P=0.037$ ) [31].  
36  
37  
38  
39  
40  
41

### 42 **3.5 Clinical efficacy of balloon dilation for male urethral strictures**

#### 43 **3.5.1 Conventional balloon dilation success rate**

44 For studies with conventional balloon dilation, we defined success of balloon dilation  
45 as no recurrence or no further stricture treatment during follow-up, excluding studies  
46 with a sample size of less than 30 on account of the potentially higher selection bias  
47 and merging data from 8 studies published in 2012-2022 [31, 32, 34-36, 38-40]. The  
48 pooled balloon dilation success rate was 67.07% (95% CI: 55.92%-77.36%;  
49 heterogeneity:  $I^2=86.8683\%$ ,  $p<0.05$ ) (Figure 2A). This result needs to be taken with  
50 caution and most likely overestimates the efficacy of balloon dilation.  
51

52 We performed a sensitivity analysis by excluding studies one by one. The recalculated  
53 results are shown in Supplementary Table 4 & Supplementary Figure 3. Compared to  
54 the pooled result of all studies, the maximum deviation rate is 5.3%, indicating that  
55 the final pooled result is relatively stable. We further did meta-regression and found  
56 that factors such as location of the stricture ( $t=5.25$ ,  $p < 0.05$ ), and length of the  
57  
58  
59  
60



stricture ( $t=7.97$ ,  $p < 0.05$ ), age ( $t=7.97$ ,  $p < 0.05$ ) may be associated with the high heterogeneity, and subgroup analyses of these factors were performed in the following contents of section 3.6.

### 3.5.2 Drug coated balloon dilation success rate

Balloons coated with drugs such as paclitaxel have achieved promising clinical results in recent years. Two studies on paclitaxel coated balloon in recurrent urethral stricture expressed its considerable effect on recurrent urethral stricture with relatively objective functional success rate (67%) and anatomical success rate (74.6%) [27, 28]. Functional success rate was defined as the percentage of subjects with  $\geq 50\%$  improvement in IPSS scores who did not require retreatment. Anatomical success rate was defined as the proportion of participants who could be atraumatically passed a 16Fr flexible cystoscope or a 14Fr catheter through the treated area at 6 months.

### 3.5.3 Assessment of patient's clinical symptoms

The changes in urinary flow rate, PVR, and IPSS scores of patients are summarized in Table 3. Compared with the preoperative condition, we found that the postoperative maximum urinary flow rate was greatly improved at 3 months (RR=2.6510, 95% CI: 1.0681-4.2338;  $z=3.282$ ,  $p < 0.01$ ;  $I^2=96.5\%$ ,  $p < 0.05$ ), and the significant difference remained at one year postoperatively (RR=1.6637, 95% CI: 1.1837-2.1437;  $z=6.794$ ,  $p < 0.01$ ;  $I^2=78.8\%$ ,  $p < 0.05$ ). The patient's IPSS scores and PVR also decreased accordingly.

Patients' subjective perception of improvement in voiding symptoms is a crucial indicator of the true efficacy of urethral stricture, and the concrete results are summarized in Table 4. The ROBUST III study [28] found that patients' International Prostate Symptom Score - Quality of Life (IPSS QoL) scores had risen significantly by 30 days after balloon dilation, with outstanding short-term efficacy. Moreover, three-year follow-up results from the ROBUST I trial study [27] indicated significant improvements in both QoL scores and Patient-Reported Outcome Measure for Urethral Stricture Surgery (USS-PROM) scores for patients with balloon dilation compared to baseline status ( $p < 0.0001$ ). With the extension of follow-up time, the quality of life of the patients remained at a good level, reflecting the long-term effectiveness of balloon dilation.

**Table 1: The clinical characteristics and efficiency of balloon dilation ( I ).**

| Study                  | Evaluable Patients (n) | Age (average)         | Etiology | Location of the Strictures | Length of Stricture | Pre-dilated state                                                    |
|------------------------|------------------------|-----------------------|----------|----------------------------|---------------------|----------------------------------------------------------------------|
| Virasoro, Ramon et al. | 43                     | 50.7<br>(22.0 - 81.0) | /        | Anterior urethra           | $\leq 2$ cm         | 1-4 prior endoscopic treatments (none within 3 months of enrollment) |

|                        |                   |                                |                                                                                                                                                       |                                                                                 |                                               |                                                                                                                                                        |
|------------------------|-------------------|--------------------------------|-------------------------------------------------------------------------------------------------------------------------------------------------------|---------------------------------------------------------------------------------|-----------------------------------------------|--------------------------------------------------------------------------------------------------------------------------------------------------------|
| Elliott, S. P. et al.  | 60 (79): 15 (48)* | 60.6 ± 16.0 :<br>58.7 ± 15.5   | Iatrogenic (21/78, 26.9%);<br>Idiopathic (42/78, 53.8%);<br>Inflammatory (1/78, 1.3%);<br>Traumatic (14/78, 17.9%);<br>pelvic radiation (9/79, 11.4%) | Anterior urethra                                                                | ≤ 3 cm                                        | ≥ 2 prior endoscopic treatments                                                                                                                        |
| Beeder, L. A. et al.   | 91                | 61                             | /                                                                                                                                                     | Anterior urethra (n=75, 82%);<br>posterior urethra (n=16, 18%)                  | /                                             | Most (75/91, 82%) had prior treatment for USD (endoscopic 50/91 (55%), 51/91 (56%) urethroplasty)                                                      |
| Alibekov, M. M. et al. | 7                 | 52 (47 - 65)                   | Idiopathic (4/7, 57.1%);<br>Inflammatory (1/7, 14.3%);<br>Traumatic (2/7, 28.6%)                                                                      | Anterior urethra                                                                | ≤ 1 cm                                        | All patients had 1 urethral stone. The sizes of the stone ranged from 4 to 9 mm (median - 6 mm)                                                        |
| Yi, Y. A. et al.       | 80                | /                              | /                                                                                                                                                     | Anterior urethra (n=59, 74%);<br>posterior urethra (n=21, 26%)                  | ≤ 1.5 cm                                      | Over 75% of patients had some form of prior stricture treatment, including dilation (34/80, 42.5%), DVIU (19/80, 23.8%), or urethroplasty (48/80, 60%) |
| Kumano, Y. et al.      | 13 : 9            | 71 : 63                        | Iatrogenic (10/13, 76.9%);<br>Idiopathic (3/13, 23.1%)                                                                                                | Anterior urethra (n=9, 41%);<br>posterior urethra (n=13, 59%)                   | /                                             | /                                                                                                                                                      |
| Zhou, Y. et al.        | 45                | 46.6 (22 - 76)                 | Iatrogenic (19/45, 42.2%);<br>Inflammatory (5/45, 11.1%);<br>Traumatic (18/45, 40%);<br>pelvic radiation (3/45, 6.7%)                                 | Anterior urethra (n=36, 80%);<br>posterior urethra (n=9, 20%)                   | ≤ 2 cm                                        | 5 patients had a prior suprapubic cystostomy                                                                                                           |
| Yu, S. C. et al.       | 31 : 25           | 49 (32 - 67) :<br>44 (24 - 71) | Iatrogenic (7/31, 22.6%);<br>Idiopathic (1/31, 3.2%);<br>Inflammatory (2/31, 6.5%);<br>Traumatic (21/31, 67.7%);                                      | Anterior urethra (n=45, 80%);<br>posterior urethra (n=11, 20%)                  | ≤ 1 cm (n=48, 86%) ;<br>> 1 cm (n=8, 14%)     | None received prior endovascular therapy                                                                                                               |
| Chhabra, J. S. et al.  | 134 (144)*        | 52 (18 - 85)                   | Iatrogenic (59/144, 41.0%);<br>Idiopathic (84/144, 58.3%);<br>pelvic radiation (1/144, 0.7%)                                                          | Anterior urethra (n=110, 76%);<br>posterior urethra (n=8, 6%); both (n=26, 18%) | ≤ 1.5 cm (n=130, 90%) ;<br>> 1 cm (n=14, 10%) | /                                                                                                                                                      |
| Ishii, Gen et al.      | 10                | 70 (61 - 75)                   | Iatrogenic                                                                                                                                            | Posterior urethra                                                               | /                                             | All patients had cystourethral anastomotic stricture after radical prostatectomy                                                                       |
| Mao, D. et al.         | 37 (39)*          | 55 (24 - 84)                   | /                                                                                                                                                     | Anterior urethra (n=17, 44%);<br>posterior urethra (n=20, 51%); both            | ≤ 2 cm                                        | /                                                                                                                                                      |



|                          |        |                    |                                                                                                                    |                                                                     |                                       |   |
|--------------------------|--------|--------------------|--------------------------------------------------------------------------------------------------------------------|---------------------------------------------------------------------|---------------------------------------|---|
|                          |        |                    |                                                                                                                    | (n=2, 5%)                                                           |                                       |   |
| Vyas, J. B. et al.       | 120    | 49.86<br>(30 - 85) | /                                                                                                                  | Anterior urethra<br>(n=114, 95%);<br>posterior urethra<br>(n=6, 5%) | ≤ 1.5 cm                              | / |
| Alguersuari, A. et al.   | 65     | 63.17 ± 16.9       | /                                                                                                                  | Anterior urethra<br>(26.2%); posterior<br>urethra (73.8%)           | ≤ 2 cm<br>(86.2%) ;<br>> 2 cm (13.8%) | / |
| MacDiarmid, S. A. et al. | 51     | /                  | Iatrogenic (27/51, 52.9%);<br>Idiopathic (11/51, 21.6%);<br>Inflammatory (10/51, 19.6%);<br>Traumatic (3/51, 5.9%) | Anterior urethra<br>(n=49, 96%);<br>posterior urethra<br>(n=2, 4%)  | /                                     | / |
| Mohammed, S. H. et al.   | 6 (7)* | 35<br>(16 - 67)    | Iatrogenic (1/6, 16.7%);<br>Idiopathic (2/6, 33.3%);<br>Inflammatory (2/6, 33.3%);<br>Traumatic (1/6, 16.7%)       | Anterior urethra<br>(n=4, 57%);<br>posterior urethra<br>(n=3, 43%)  | /                                     | / |

\* In parentheses are the number of people who were initially assessed at baseline in the study, and outside brackets were the number of people who could be effectively assessed at the end of the follow-up.

**Table 2: The clinical characteristics and efficiency of balloon dilation ( II ).**

| Study                  | Balloon Types                                     | Control         | Definition of Success Rate                                                                                                                                                                     | Reported Success Rate (%) | Follow-up                    |
|------------------------|---------------------------------------------------|-----------------|------------------------------------------------------------------------------------------------------------------------------------------------------------------------------------------------|---------------------------|------------------------------|
| Virasoro, Ramon et al. | Optilume® drug coated balloon (DCB)               | /               | Functional success was defined as ≥50% reduction in International Prostate Symptom Score (IPSS) without need for retreatment.                                                                  | 67                        | 3 years                      |
| Elliott, S. P. et al.  | Optilume® drug coated balloon (DCB)               | dilation / DVIU | Anatomical success: the proportion of participants in whom the surgeons could atraumatically pass a 16-French flexible cystoscope or a 14-French catheter through the treated area at 6 months | 74.6 : 26.8               | 1 year                       |
| Beeder, L. A. et al.   | 8-cm, 24-French UroMax Ultra™ balloon dilator     | /               | Proportion of patients who reported no recurrence of lower urinary tract symptoms or did not need further stricture treatment                                                                  | 50                        | 12 months (3 - 40)           |
| Alibekov, M. M. et al. | /                                                 | /               | Proportion of patients without recurrence of urethral stricture after 18 months of dilation                                                                                                    | 85.7                      | 14 months (3 - 24)           |
| Yi, Y. A. et al.       | 8-cm, 24-French UroMax Ultra™ balloon dilator     | /               | Proportion of patients with postoperative urethral stricture who did not recur or did not need further stricture treatment                                                                     | 66.3                      | 8.4 months (IQR, 3.9 - 22.5) |
| Kumano, Y. et al.      | Balloon dilation catheter (X-FORCE; BARD Medical, | OIU             | Proportion of patients with no recurrence of stricture during the follow-up period                                                                                                             | 84 : 22                   | /                            |

|                          |                                                                                     |      |                                                                                                                            |      |                       |
|--------------------------|-------------------------------------------------------------------------------------|------|----------------------------------------------------------------------------------------------------------------------------|------|-----------------------|
|                          | Murray Hill, NJ, USA)                                                               |      |                                                                                                                            |      |                       |
| Zhou, Y. et al.          | Balloon catheter (X-Force™, C.R. Bard Inc., USA)                                    | /    | Proportion of patients without further stricture treatment during the follow-up period                                     | 86.7 | 6 - 24 months         |
| Yu, S. C. et al.         | 6-cm, 7-French balloon catheter (X-Force™, C.R. Bard Inc., USA)                     | DVIU | Proportion of patients with postoperative urethral stricture who did not recur or did not need further stricture treatment | 35.5 | 14.75 months (5 - 36) |
| Chhabra, J. S. et al.    | 8-cm, 24-French urethral Balloon catheter set (Cook Urological, Spencer, Ind., USA) | /    | Proportion of patients without further stricture treatment during the follow-up period                                     | 84.4 | 24 months (3 - 52)    |
| Ishii, Gen et al.        | 6-cm, 6-French Balloon catheter, the X Force®                                       | /    | Proportion of patients with no recurrence of stricture during the follow-up period                                         | 80   | 24 months (7 - 67)    |
| Mao, D. et al.           | 24-French Nephrostomy balloon dilation catheter, the X Force®                       | /    | Proportion of patients without further stricture treatment during the follow-up period                                     | 64.9 | /                     |
| Vyas, J. B. et al.       | 8-cm, 24-French urethral Balloon catheter set (Cook Urological, Spencer, Ind., USA) | /    | Proportion of patients without further stricture treatment during the follow-up period                                     | 68   | 6 months (2 - 60)     |
| Alguersuari, A. et al.   | fluoroscopic- guided balloon dilation                                               | /    | Proportion of patients without further stricture treatment during the follow-up period                                     | 69   | /                     |
| MacDiarmid, S. A. et al. | The UrethraMax (4, 6, or 8-cm; 24-French) or a coude tip balloon dilation catheter  | /    | Proportion of patients without further stricture treatment during the follow-up period                                     | 55   | 9 months (1 - 16)     |
| Mohammed, S. H. et al.   | Olbert balloon catheter                                                             | /    | Proportion of patients without further stricture treatment during the follow-up period                                     | 66.7 | 12 months (6 - 26)    |

DVIU, direct vision internal urethrotomy; OIU, optical internal urethrotomy.

**Table 3: Changes in urinary flow rate, PVR, and IPSS scores of patients after balloon dilation. (The following table is continued to the right)**

| Study                       | Location of the Strictures    | Length of Strictures |
|-----------------------------|-------------------------------|----------------------|
| Virasoro, Ramon et al. 2022 | Anterior urethra              | ≤ 2 cm               |
| Elliott, S. P. et al. 2022  | Anterior urethra              | ≤ 3 cm               |
| Zhou, Y. et al. 2016        | Anterior urethra (n=36, 80%); | ≤ 2 cm               |

|                               |                                                                              |                                                      |
|-------------------------------|------------------------------------------------------------------------------|------------------------------------------------------|
|                               | posterior urethra (n=9, 20%)                                                 |                                                      |
| Chhabra, J. S. et al. 2016    | Anterior urethra (n=110, 76%); posterior urethra (n=8, 6%); both (n=26, 18%) | $\leq 1.5$ cm (n=130, 90%) ;<br>$> 1$ cm (n=14, 10%) |
| Vyas, J. B. et al. 2013       | Anterior urethra (n=114, 95%); posterior urethra (n=6, 5%)                   | $\leq 1.5$ cm                                        |
| MacDiarmid, S. A. et al. 2000 | Anterior urethra (n=49, 96%); posterior urethra (n=2, 4%)                    | /                                                    |

| IPSS                     |                           |                           |                           |                           |                          |  |
|--------------------------|---------------------------|---------------------------|---------------------------|---------------------------|--------------------------|--|
| Before surgery           | 3 months                  | 6 months                  | 1 year                    | 2 year                    | 3 year                   |  |
| 25.2 $\pm$ 4.5<br>(n=53) | 6.1 $\pm$ 7.6<br>(n=51)   | 4.6 $\pm$ 5.2<br>(n=45)   | 4.5 $\pm$ 3.9<br>(n=40)   | 6.9 $\pm$ 7.7<br>(n=38)   | 5.5 $\pm$ 6.9<br>(n=33)  |  |
| 22.0 $\pm$ 6.8<br>(n=79) | 7.4 $\pm$ 5.8<br>(n=74)   | 8.3 $\pm$ 6.2<br>(n=71)   | 9.0 $\pm$ 7.1<br>(n=67)   | /                         | /                        |  |
| /                        | /                         | /                         | /                         | /                         | /                        |  |
| /                        | /                         | 12.7<br>(n=112)           | 12.6<br>(n=112)           | /                         | /                        |  |
| 21.6<br>(n=120)          | 11.4<br>(n=120)           | 12.6<br>(n=120)           | /                         | /                         | /                        |  |
| /                        | /                         | /                         | /                         | /                         | /                        |  |
| Qmax (mL/sec)            |                           |                           |                           |                           |                          |  |
| Before surgery           | 3 months                  | 6 months                  | 1 year                    | 2 year                    | 3 year                   |  |
| 5.0 $\pm$ 2.6<br>(n=46)  | 22.2 $\pm$ 12.5<br>(n=51) | 19.8 $\pm$ 10.8<br>(n=45) | 20.1 $\pm$ 10.0<br>(n=39) | 17.5 $\pm$ 10.4<br>(n=38) | 15.1 $\pm$ 8.3<br>(n=33) |  |
| 7.6 $\pm$ 3.4<br>(n=78)  | 18.6 $\pm$ 10.9<br>(n=71) | 16.6 $\pm$ 8.9<br>(n=69)  | 15.5 $\pm$ 9.0<br>(n=65)  | /                         | /                        |  |
| 5.6 $\pm$ 1.4<br>(n=45)  | 19.8 $\pm$ 3.9<br>(n=45)  | /                         | /                         | /                         | /                        |  |
| 5.2 $\pm$ 2.7<br>(n=144) | /                         | 15.4 $\pm$ 7.2<br>(n=112) | 12.6 $\pm$ 5.7<br>(n=112) | /                         | /                        |  |
| 5.7<br>(n=120)           | 14.3<br>(n=120)           | 12.7<br>(n=120)           | /                         | /                         | /                        |  |
| 10.4<br>(n=48)           | 15.3<br>(n=43)            | 17.7<br>(n=27)            | 15.2<br>(n=5)             | /                         | /                        |  |

| PVR (mL)                |                         |                           |                           |                          |                          |
|-------------------------|-------------------------|---------------------------|---------------------------|--------------------------|--------------------------|
| Before surgery          | 3 months                | 6 months                  | 1 year                    | 2 year                   | 3 year                   |
| 141.4 ±<br>105.1 (n=43) | 141.4 ±<br>105.1 (n=51) | 30.0 ±<br>42.8<br>(n=45)  | 24.6 ±<br>32.1<br>(n=39)  | 45.5 ±<br>49.5<br>(n=38) | 50.2 ±<br>62.5<br>(n=33) |
| 109.8 ±<br>116.9 (n=77) | 103.4 ±<br>134.4 (n=70) | 73.1 ±<br>117.7<br>(n=67) | 94.6 ±<br>121.8<br>(n=66) | /                        | /                        |
| /                       | /                       | /                         | /                         | /                        | /                        |
| /                       | /                       | /                         | /                         | /                        | /                        |
| 90.2<br>(n=120)         | 34.2<br>(n=120)         | 20.2<br>(n=120)           | /                         | /                        | /                        |
| /                       | /                       | /                         | /                         | /                        | /                        |

IPSS, International Prostate Symptom Scores; Qmax, maximum uroflow; PVR, post-void residual urine volume.

**Table 4: Changes in USS-PROM, IPSS QoL, and IIEF scores of patients after balloon dilation.**

| Study: Virasoro, Ramon et al. 2022 |                       |                       |                          |                          |                          |                       |
|------------------------------------|-----------------------|-----------------------|--------------------------|--------------------------|--------------------------|-----------------------|
| Scoring items                      | Before surgery        | 3 months              | 6 months                 | 1 year                   | 2 year                   | 3 year                |
| USS-PROM                           | 15.9 ± 4.7<br>(n=53)  | 3.2 ± 5.5<br>(n=51)   | 1.9 ± 2.9<br>(n=45)      | 1.4 ± 1.8<br>(n=40)      | 3.6 ± 5.8<br>(n=38)      | 2.0 ± 3.5<br>(n=33)   |
| IPSS QoL                           | 4.9 ± 0.9<br>(n=53)   | 0.8 ± 1.3<br>(n=51)   | 0.7 ± 0.9<br>(n=45)      | 0.7 ± 0.9<br>(n=40)      | 0.9 ± 1.5<br>(n=38)      | 0.7 ± 1.2<br>(n=33)   |
| IIEF - OS                          | 6.5 ± 2.6<br>(n=53)   | 7.9 ± 2.5<br>(n=51)   | 7.9 ± 2.5<br>(n=45)      | 8.1 ± 2.5<br>(n=40)      | 7.6 ± 2.5<br>(n=38)      | 8.2 ± 2.2<br>(n=33)   |
| IIEF - EF                          | 16.0 ± 12.2<br>(n=53) | 20.7 ± 12.0<br>(n=51) | 21.0 ±<br>11.8<br>(n=45) | 22.1 ±<br>10.9<br>(n=40) | 21.1 ±<br>11.9<br>(n=38) | 22.5 ± 11.2<br>(n=33) |
| Study: Elliott, S. P. et al. 2022  |                       |                       |                          |                          |                          |                       |
| Scoring items                      | Before surgery        | 30 days               | 3 months                 | 6 months                 | 1 year                   | /                     |
| IPSS QoL                           | 4.5 ± 1.3<br>(n=79)   | 1.7 ± 1.4<br>(n=78)   | 1.6 ± 1.4<br>(n=74)      | 1.7 ± 1.3<br>(n=71)      | 1.9 ± 1.5<br>(n=67)      | /                     |
| IIEF                               | 5.8 ± 2.9<br>(n=72)   | 5.9 ± 2.8<br>(n=75)   | 6.6 ± 2.7<br>(n=71)      | 6.5 ± 2.8<br>(n=68)      | 6.9 ± 3.0<br>(n=59)      | /                     |

1  
2  
3 USS-PROM, Patient-Reported Outcome Measure for Urethral Stricture Surgery; IPSS  
4 QoL, International Prostate Symptom Score - Quality of Life; IIEF, International  
5 Index of Erectile Function; IIEF – OS, International Index of Erectile Function –  
6 overall satisfaction domain; IIEF – EF, International Index of Erectile Function –  
7 erectile function domain.  
8  
9

### 10 11 **3.5.4 Comparison of balloon dilation with other endoluminal treatments**

12 We conducted a separate analysis of two studies compared with DVIU and optical  
13 internal urethrotomy (OIU), finding no statistically significant difference in efficacy  
14 between conventional balloon dilation and internal urethrotomy (RR=1.4754, 95%CI:  
15 0.7306-2.9793; z=1.085, p=0.278; heterogeneity: I<sup>2</sup>=0%, p=0.351) (Figure 2B). The  
16 study by Yu, S. C. et al found the estimated stricture-free rate at 12 months was  
17 77.42% after balloon dilation and 48.00% after DVIU, which showed a significantly  
18 higher stricture-free survival in the balloon dilation group (P=0.02<0.05, HR=0.35,  
19 95% CI for HR: 0.14–0.87) [31]. In Kumano, Y.'s study, the balloon dilation group  
20 had significantly longer stricture-free times than optical internal urethrotomy  
21 (p<0.01), with median (mean) stricture -free times of 1675 (1673) and 244 (599) days,  
22 respectively [30]. For the time being, there are no studies comparing the clinical  
23 outcomes of simple dilation versus balloon dilation. Although there is insufficient  
24 evidence to suggest that balloon dilation is superior to other conventional endoluminal  
25 therapies, balloon dilation may have a longer stricture -free time  
26  
27  
28  
29  
30  
31

## 32 **3.6 Clinical preference and efficacy influencing factors of balloon dilation**

### 33 **3.6.1 Etiology**

34 We pooled eight studies of simple balloon dilation that addressed specific etiologies  
35 [29-31, 33, 35-37, 41], involving a total of 307 patients. Iatrogenic urethral strictures  
36 (43.32%, 133/307) and idiopathic urethral strictures (34.20%, 105/307) accounted for  
37 the vast majority. The stricture caused by trauma and inflammation accounted for  
38 14.66% (45/307) and 6.51% (20/307) respectively. There were also 4 patients  
39 suffering from radiation. Although this is only a one-sided epitome, it follows the  
40 trend that iatrogenic injury may become the main etiology of urethral stricture in  
41 males in the future.  
42  
43  
44

45 Due to the lack of meticulous subgroup analysis in the included literatures, it is  
46 difficult for us to directly compare the efficacy difference among strictures caused by  
47 different etiologies. The influence of etiology on the efficacy of balloon dilation  
48 depends primarily on the type of stenotic pathology it creates and the specific stenotic  
49 segment length and location. The essence of balloon dilation is the expansion of  
50 physical properties, which needs to avoid the re fibrosis of scar tissue in the narrow  
51 segment to the greatest extent. Once the process of re-fibrosis progresses, strictures  
52 are highly likely to recur. Therefore, balloon dilation may not perform well for  
53 strictures with high degree of fibrosis. Lichen sclerosus is a specific cause of urethral  
54 strictures. The narrow segment pathologic features of lichen sclerosus include  
55 hyperkeratosis or epithelial atrophy, basal cell vacuolar degeneration, lichenoid  
56 lymphocytic infiltration, and upper epithelial sclerosis [44]. This epithelial stromal  
57  
58  
59  
60

1  
2  
3 lesion characterized by squamous atrophy or hyperplasia is distinct from the fibrotic  
4 pathologic characterization of most urethral strictures. A recent review pooling expert  
5 opinion in urology stated dilation is unlikely to be a successful long-term solution for  
6 lichenoid sclerosing urethral stricture, potentially triggering longer adverse outcomes  
7 [45]. Balloon dilation is essentially a physical treatment, which is difficult to  
8 pathologically and fundamentally improve the condition of patients with specific  
9 urethral strictures, and its clinical indications need to be strictly controlled..  
10  
11  
12

### 13 **3.6.2 Location of urethral stricture**

14 We combined 11 studies that identified the location of stricture [29, 32-41]. The  
15 patients with anterior urethral stricture accounted for 74.28% (488/657), the patients  
16 with posterior urethral stricture accounted for 21.77% (143/657), and 3.95% (26/657)  
17 patients had both strictures. The majority of patients receiving balloon dilation are  
18 patients with anterior urethral stricture, since its high incidence rate.  
19

20 Most of the current studies have not further categorized comparisons of balloon  
21 dilation based on differences in stricture location, and cases with different stricture  
22 sites were analyzed together. A subgroup analysis of eight conventional balloon  
23 dilation studies that were involved in the combination of success rate previously [31,  
24 32, 34-36, 38-40] was performed according to the percentage of anterior urethral  
25 strictures, and the results are shown in Supplementary Figure 4. The combined results  
26 of studies dominated by anterior urethral strictures (70%-90%) indicated a success  
27 rate of 66.45% (95% CI: 47.58%-83.01%) for balloon dilation.  
28

29 Moreover, we combined data from two studies [32, 34] that performed subgroup  
30 analysis of stricture location and did not find any statistical difference in the efficacy  
31 of balloon dilation between anterior and posterior urethral strictures (RR=0.9568,  
32 95%CI: 0.6618-1.3832, p=0.814) (Figure 3A).  
33  
34  
35  
36  
37

### 38 **3.6.3 Length of urethral stricture**

39 We performed a subgroup analysis of pooled conventional balloon dilation success  
40 rate previously [31, 32, 34-36, 38-40] due to the length of urethral stricture, and the  
41 results are shown in Figure 3B. In shorter strictures ( $\leq 2$ cm), the success rate of  
42 balloon dilation was up to 71.58% (95% CI: 61.93%-80.35%), and heterogeneity was  
43 also reduced ( $I^2=63.2342\%$ ,  $p < 0.05$ ) (Figure 3B). In a study of patients with anterior  
44 urethral strictures of less than 1 cm in length, the success rate was as high as 85.7%  
45 [33]. The reduction in heterogeneity of the pooled results suggests that the stenotic  
46 segment length is a prognostic factor, and balloon dilation may have a higher success  
47 rate in short segment urethral strictures.  
48  
49  
50  
51

### 52 **3.6.4 Age**

53 We further stratified the previous eight studies [31, 32, 34-36, 38-40] on account of  
54 different age groups, the results were shown in Figure 3C. In the age group of 50 to  
55 60 years, the success rate of balloon dilation was 80.79% (95% CI: 74.42%-86.47%).  
56 However, when the patients were over 60 years old, the success rate dropped to  
57 58.49% (95% CI: 50.61%-66.17%). Interestingly, the combined success rate was at  
58  
59  
60

1  
2  
3 65.39% (95% CI: 39.61%-87.22%) in relatively young patients, probably because part  
4 of the reported younger patient had a more severe stricture. The etiology of strictures  
5 in elderly patients is often iatrogenic, whereas in younger patients more complex  
6 urethral strictures can be caused by relatively specific factors such as trauma and  
7 lichenoid sclerosis gonorrhoea. Even though the success rate is somewhat subjective,  
8 we can roughly see the decreasing trend of the efficacy of balloon dilation in elderly  
9 patients.  
10  
11  
12

### 13 **3.6.5 Prior intervention management**

14 A separate analysis of patients who had received prior endoscopic management  
15 (catheter/balloon dilation, direct visual internal urethrotomy) in two studies [32, 34]  
16 was performed and we found that balloon dilation had a pooled success rate of  
17 49.51% (95% CI: 39.79%-59.26%) (Figure 3D). In patients with previous surgical  
18 intervention, the efficacy of balloon dilation may be diminished. Based on the limited  
19 data available in these two studies [32, 34], we compared patients with and without  
20 previous urethroplasty, and found no statistical difference in the success rate of  
21 conventional balloon dilation (RR=1.1682, 95%CI: 0.6160-2.2153, p=0.634)  
22 (Supplementary Figure 5A). The prevailing clinical view is that repeated endoluminal  
23 intervention may render further endoluminal treatment less effective, but this needs to  
24 be confirmed by clinical studies with larger sample sizes.  
25  
26  
27  
28  
29

### 30 **3.6.6 Other patient status**

31 We performed a more nuanced subgroup analysis of the two studies [32, 34] that  
32 provided some patient baseline details. There was no statistically significant  
33 difference in balloon dilation efficacy between patients with a history of smoking and  
34 non-smoking patients (RR=1.1052, 95%CI: 0.8083-1.5112, p=0.531) (Supplementary  
35 Figure 5B). Chronic diseases such as coronary artery disease (RR=1.0714, 95%CI:  
36 0.7618-1.5069, p=0.692), diabetes mellitus (RR=0.9144, 95%CI: 0.6118-1.3666,  
37 p=0.662), hypertension (RR=0.8377, 95%CI: 0.6121-1.1464, p=0.269), and chronic  
38 obstructive pulmonary disease (RR=1.3515, 95%CI: 0.7495-2.4374, p=0.317) also  
39 did not show statistical differences in the efficacy of balloon dilation (Supplementary  
40 Figure 5C-F). Our preliminary analysis results suggest that patient status such as poor  
41 living habits and chronic diseases may not have a significant impact on the efficacy of  
42 balloon dilation.  
43  
44  
45  
46  
47  
48

### 49 **3.7 Intermittent urethral balloon self-dilation**

50 Patient self-balloon dilation is a specific form of balloon dilation, and we also briefly  
51 review its clinical evaluation. Urethral dilation is easy to perform and can be  
52 performed by the patient at home, avoiding repeated hospitalizations and frequent  
53 general anesthesia [46]. A study by Levine, L. A. [47] suggests that adjuvant home  
54 balloon self-dilation may be a potential option for patients at high risk of recurrence.  
55 In this study of 25 evaluable patients, the majority of patients noted that balloon  
56 dilation improved voiding and maintained or improved peak urinary flow rate at an  
57 average of 18.7 months of long-term follow-up. Nonetheless, six patients (19%)  
58  
59  
60



1  
2  
3 complained of balloon placement discomfort, 3 (10%) noted minor bleeding during  
4 dilation, and 4 (13%) developed urinary tract infections during follow-up. Hennessey,  
5 D. B.'s initial experience with self-expanding balloon dilation in the outpatient setting  
6 was encouraging, with all 11 patients reporting that they were very satisfied or  
7 satisfied with overall outcomes and quality of life [48]. A recent study reported in  
8 2021 stated that the self-urethral balloon dilation offers patients with complex  
9 strictures, especially those with a history of radiation, an opportunity to avoid surgical  
10 intervention [49].

11  
12 However, due to the imprecision of patient self-balloon dilation, which may cause  
13 complications and even aggravate injury. As early as the last century, scholars have  
14 shown that short-term postoperative self-dilation techniques do not appear to prevent  
15 recurrence of strictures in patients treated with endourethral incisions [50]. A recent  
16 meta-analysis of patient self-dilation also indicated that the quality of evidence for  
17 this approach to reduce the risk of recurrent urethral strictures is very low [51].  
18 Although self-dilation is very convenient and avoids the complications of surgery, it is  
19 not suitable for all patients, and not all patients can master the skills and techniques of  
20 dilation. Self-balloon dilation by the patient needs to be further weighed against  
21 surgery, and well-designed randomized controlled trials are needed to determine  
22 whether this benefit of convenience is sufficient to make this intervention worthwhile.  
23  
24  
25  
26  
27  
28  
29

#### 30 **4. Discussion**

31  
32 With the gradual increase of iatrogenic urethral strictures, the surgeon should choose  
33 the appropriate treatment method according to the etiology of the urethral stricture,  
34 the location and length of the stricture, and the degree of urethral fibrosis.

35  
36 Even though there is no clear evidence that the clinical efficacy of balloon dilation is  
37 significantly better than that of other endoluminal treatments, balloon dilation still has  
38 a large clinical plasticity.

39  
40 Both balloon dilation and simple dilation are essentially dilatation, a tearing of scar  
41 tissue and scar remodeling at the site of the stricture. Balloon dilation applies a 360°  
42 circumferential radial force at the stricture site, providing a more uniform force than  
43 simple dilation. Meanwhile, for some harder scars that cannot be torn by simple  
44 dilation, the balloon can gradually increase the pressure to achieve the purpose of  
45 dilatation, which has a broader clinical indications.

46  
47 Urethrotomy leads to a radial incision at the site of the stricture. The study by Yu, S.  
48 C. et al found that the balloon dilation operation time was much shorter than DVIU  
49 [(13.19±2.68) min vs (18.44±3.29) min, P<0.01] [31], highlighting the operational  
50 simplicity of balloon dilation. The main disadvantage of internal urethrotomy is the  
51 inability to accurately estimate the depth of scar tissue during the procedure, resulting  
52 in imprecise scar tissue incisions. There may also be damage to the corpus  
53 cavernosum below the urethra, and vascular disruption in the corpus cavernosum and  
54 localized extravasation of urine through mucosal fissures may exacerbate corpus  
55 cavernosum fibrosis, eventually leading to recurrence of strictures [31, 52]. Some  
56 scholars believe that balloon dilation tends to be performed in less fibrotic cases  
57  
58  
59  
60



1  
2  
3 without urethral cavernous fibrosis, speculating that the role of balloon dilation will  
4 not invade the deep urethral membrane, therefore, even if the dilation time is longer,  
5 the restenosis rate of balloon dilation is lower than optical internal urethrotomy [30].  
6 Thus, DVIU is commonly used for posterior urethral strictures and is avoided in the  
7 penile urethra to prevent leakage of the cavernous penile veins to circumvent the risk  
8 of causing impotence. Balloon dilation has no definitive stricture site limitations and  
9 can be effective in the dilatation of hard-textured scars that cannot be incised by  
10 DVIU.  
11

12  
13 The advent and use of drug-coated balloons can reduce inflammation and reduce  
14 relapse rates by releasing drugs such as immunosuppressants while expanding.  
15 Barbalias, D. et al conducted animal experiments using paclitaxel-coated balloons and  
16 found that paclitaxel could break through the urothelial barrier and immediately  
17 distribute to the urothelium, submucosa and smooth muscle layers of the normal  
18 rabbit urethra after dilation [53]. The drug can penetrate the epithelium and act on the  
19 deep urethral tissue, effectively reduce inflammation and inhibit urethral fibrosis. In  
20 the recent ROBUST I study [28], Optilume drug coated balloon (DCB) maintained  
21 symptomatic improvement for 3 years after treatment in a highly susceptible  
22 population with recurrent urethral strictures. The 43 patients in this trial had a  
23 functional success rate of 67%, a retreatment-free rate of 77%, and an improvement in  
24 mean IPSS from 25.2 at baseline to 5.5 at 3 years ( $p < 0.0001$ ). One-year results from  
25 another RCT (ROBUST III study) [27] showed that Optilume DCB had a  
26 significantly higher anatomical success rate at 6 months than the DVIU group (75% vs  
27 27%,  $p < 0.001$ ). Immediate symptoms and urinary flow rates were significantly  
28 improved in both groups, but the effects were significantly more durable in the  
29 Optilume DCB group. The United States Food and Drug Administration (FDA) has  
30 approved the Optilume Device for the treatment of male urethral strictures [54].  
31 Nevertheless, in the ROBUST III study [27], the incidence of serious adverse events  
32 in the control group (DVIU / simple dilation) and DCB group was 16.7% and 10.1%,  
33 respectively. The types and incidence of adverse events in the two groups were very  
34 matched, but the incidence of postoperative hematuria and dysuria was higher in the  
35 DCB group than in the control group (11.4% and 2.1% for both event types,  
36 respectively). Besides, Rhenium-188 mercaptoacetyltriglycine-filled balloon dilation  
37 is expected to delay stricture recurrence in patients with urethral strictures. A  
38 clinical report of five patients found that the mean treatment interval was prolonged  
39 from 2.2 months to 10.7 months after Rhenium-188 mercaptoacetyltriglycine-filled  
40 balloon dilation [55]. The design of new balloons such as cutting balloons and the  
41 exploration of some new expansion techniques may be another important direction in  
42 the future [56, 57]. The new type of balloon should meet the biomechanical  
43 requirements to better fit the narrow urethra.  
44

45  
46 Although urethroplasty is considered the most recommended treatment for urethral  
47 strictures, balloon dilation can also be widely used clinically due to its simplicity and  
48 economy. Compared with urethrotomy, balloon dilation has a lower cost and can  
49 improve the efficiency of clinical turnover [58]. The timing of balloon dilation is  
50 closely related to the location, length, and scar thickness of the stricture, and  
51  
52  
53  
54  
55  
56  
57  
58  
59  
60

1  
2  
3 appropriate case selection is critical. Balloon dilation is particularly suitable for  
4 patients with urethral strictures <1 cm in length, especially bulbar urethral strictures.  
5 In patients with recurrent strictures, the treatment strategy of initial urethrotomy or  
6 urethral dilation followed by urethroplasty has been shown to be the most  
7 cost-effective strategy [59]. Balloon dilation may provide an intermediate step before  
8 urethroplasty, as well as a promising alternative therapy to simple dilation and  
9 urethrotomy. As for some patients with long segments of complex urethral strictures,  
10 balloon dilation may even be used as an initial therapeutic attempt. The use of  
11 endoscopic urethroplasty combined with balloon dilation for traumatic destruction of  
12 the prostatic membranous urethra has been previously reported [60]. Balloon  
13 dilatation can also be used in conjunction with repeat simple dilation,  
14 endourethrotomy and urethroplasty, suggesting that it may be an important  
15 intermediate choice for the treatment of male urethral stricture.

16 We recognize the limitations of our research. There is considerable risk of bias in this  
17 meta-analysis, most of which stemmed from the retrospective design of the studies  
18 and the lack of valid controls. Interpretation of evidence from retrospective  
19 observational studies needs to be approached with caution on account of the  
20 susceptibility to selection bias, recall bias, and exaggerated efficacy of balloon  
21 dilation. The assessment of the efficacy of balloon dilation is often subjective, and it is  
22 difficult to have a clear objective criterion. Different patients have different  
23 perceptions of their voiding status, and the patient's subjective feelings can influence  
24 their choice of therapeutic intervention. The efficacy of balloon dilation is also  
25 affected by confounding factors such as etiology, stricture location, stricture length,  
26 prior intervention management, comorbidities and socio-economic status. Long- term  
27 outcomes of balloon dilation need to be further refined. RCTs with better design,  
28 larger sample sizes, and more comparable control groups are needed to further  
29 illustrate the efficacy and safety of balloon dilation in the future.

### 41 **Contribution Statement**

42 Conceptualization was created by X.L and C.X. Investigation was performed by X.L,  
43 X.J, and C.X. Analysis and interpretation of data were produced by X.L, X.J and C.X.  
44 X.L and C.X wrote the manuscript. X.L and X.J conducted the statistical analysis.  
45 Critical revision of the manuscript for important intellectual content was produced by  
46 X.L, C.X, Z.Z, T.C, Z.G and J.L. Supervision was performed by J.L.

### 51 **Acknowledgement**

52 None.

### 58 **Conflict of Interest Statement**

1  
2  
3 The authors have no conflicts of interest to declare.  
4  
5  
6  
7

## 8 **Funding Sources**

9  
10 This work was financially supported by the National Natural Science Foundation of  
11  
12  
13 China (Grant Nos. 8207032402).  
14  
15  
16  
17

## 18 **Statement of Ethics**

19  
20 The outcome of this meta-analysis could improve clinical decision and help to reduce  
21  
22 the risk and cost of patients. All patients included in this study have signed informed  
23  
24 consent during the course of each trial. And specific methods of assessment in each  
25  
26 trial have been illustrated above. This systematic review did not any addition  
27  
28 intervention to all included individuals. Thanks to all the patients and researchers  
29  
30 included for their contribution to this study.  
31  
32  
33  
34  
35  
36  
37  
38

## 39 **Data availability statement**

40  
41 The datasets generated during and/or analysed during the current study are available  
42  
43 from the corresponding author on reasonable request.  
44  
45  
46  
47  
48

## 49 **References**

- 50  
51 [1] Santucci RA, Joyce GF, Wise M. Male urethral stricture disease. J Urol. 2007;177:1667-74.  
52  
53 [2] Verla W, Oosterlinck W, Spinoit AF, Waterloos M. A Comprehensive Review Emphasizing Anatomy,  
54 Etiology, Diagnosis, and Treatment of Male Urethral Stricture Disease. Biomed Res Int.  
55 2019;2019:9046430.  
56  
57 [3] Lumen N, Campos-Juanatey F, Greenwell T, Martins FE, Osman NI, Riechardt S, et al. European  
58 Association of Urology Guidelines on Urethral Stricture Disease (Part 1): Management of Male  
59 Urethral Stricture Disease. Eur Urol. 2021;80:190-200.  
60

- 1  
2  
3 [4] Stein DM, Thum DJ, Barbagli G, Kulkarni S, Sansalone S, Pardeshi A, et al. A geographic analysis of  
4 male urethral stricture aetiology and location. *BJU Int.* 2013;112:830-4.  
5  
6 [5] Cornu JN, Ahyai S, Bachmann A, de la Rosette J, Gilling P, Gratzke C, et al. A Systematic Review and  
7 Meta-analysis of Functional Outcomes and Complications Following Transurethral Procedures for  
8 Lower Urinary Tract Symptoms Resulting from Benign Prostatic Obstruction: An Update. *Eur Urol.*  
9 2015;67:1066-96.  
10  
11 [6] Hollingsworth JM, Rogers MA, Krein SL, Hickner A, Kuhn L, Cheng A, et al. Determining the  
12 noninfectious complications of indwelling urethral catheters: a systematic review and meta-analysis.  
13 *Ann Intern Med.* 2013;159:401-10.  
14  
15 [7] Lo T, Vanni A, Cronin P. Urethral stricture as a complication of high dose rate brachytherapy for  
16 prostate cancer. *Radiotherapy and Oncology.* 2011;99:S390.  
17  
18 [8] Vanni A, Cronin P, Hamawy K, Roth R, Rote A, Leventhal HH, et al. Urethral stricture as a  
19 complication of high-dose-rate brachytherapy for clinically localized prostate cancer. *Brachytherapy.*  
20 2010;9:S93.  
21  
22 [9] Wessells H, Angermeier KW, Elliott S, Gonzalez CM, Kodama R, Peterson AC, et al. Male Urethral  
23 Stricture: American Urological Association Guideline. *J Urol.* 2017;197:182-90.  
24  
25 [10] Wong SS, Aboumarzouk OM, Narahari R, O'Riordan A, Pickard R. Simple urethral dilatation,  
26 endoscopic urethrotomy, and urethroplasty for urethral stricture disease in adult men. *Cochrane*  
27 *Database Syst Rev.* 2012;12:Cd006934.  
28  
29 [11] Russinovich NAE, Lloyd LK, Griggs WP, Jander HP. Balloon dilatation of urethral strictures.  
30 *Urologic Radiology.* 1980;2:33-7.  
31  
32 [12] Pinot JJ, Hermanowicz M, Bonnet JL. Dilatation of the urethra by inflatable balloon catheter.  
33 *Nouvelle Presse Medicale.* 1983;12:163-4.  
34  
35 [13] Glesy JD, Finn JC, Hermann GD, Kinney TB, Fogarty TJ. Coaxial balloon dilation and calibration of  
36 urethral strictures. *The American Journal of Surgery.* 1984;147:611-4.  
37  
38 [14] Nishiyama T, Go H, Takashima A, Kawakami Y, Takeda M, Sato S. Balloon dilatation for entire  
39 urethral stricture. *Urologia Internationalis.* 1991;46:232-4.  
40  
41 [15] Hübler J, Solt J. Balloon catheter for the dilatation of the urethra. *Orvosi hetilap.* 1991;132:925-7.  
42  
43 [16] Rosa Arias J, Valdivia Uría JG, López López JA, Elizalde Amatria A. Pneumatic dilatation of urethral  
44 stenosis. *Archivos españoles de urología.* 1989;42:147-51.  
45  
46 [17] D'Agostino S, Campobasso P, Musi L, Cappellari F, Belloli G. Treatment of urethral stenoses in  
47 children using a balloon catheter. *La Pediatria medica e chirurgica : Medical and surgical pediatrics.*  
48 1989;11:155-9.  
49  
50 [18] Perini L, Cavallo A, Perin B, Bighi G. Dilatation of benign urethral stenosis using a balloon  
51 catheter. *La Radiologia medica.* 1988;76:8-10.  
52  
53 [19] Acunas B, Acunas G, Gokmen E, Celik L. Balloon dilatation of iatrogenic urethral strictures.  
54 *European Journal of Radiology.* 1988;8:214-6.  
55  
56 [20] Xie T, Huang X, Xu Q, Ye H, Yang Q, Wang X. Balloon dilation by B ultrasound monitoring for  
57 treatment of urethral stricture: 5 case reports. *Beijing da xue xue bao Yi xue ban = Journal of Peking*  
58 *University Health sciences.* 2014;46:657-8.  
59  
60 [21] Gelman J, Liss MA, Cinman NM. Direct vision balloon dilation for the management of urethral  
strictures. *J Endourol.* 2011;25:1249-51; discussion 51.  
[22] Page MJ, McKenzie JE, Bossuyt PM, Boutron I, Hoffmann TC, Mulrow CD, et al. The PRISMA 2020  
statement: an updated guideline for reporting systematic reviews. *BMJ (Clinical research ed).*

2021;372:n71.

[23] Higgins JP, Altman DG, Gøtzsche PC, Jüni P, Moher D, Oxman AD, et al. The Cochrane Collaboration's tool for assessing risk of bias in randomised trials. *Bmj*. 2011;343:d5928.

[24] Jadad AR, Moore RA, Carroll D, Jenkinson C, Reynolds DJ, Gavaghan DJ, et al. Assessing the quality of reports of randomized clinical trials: is blinding necessary? *Control Clin Trials*. 1996;17:1-12.

[25] Slim K, Nini E, Forestier D, Kwiatkowski F, Panis Y, Chipponi J. Methodological index for non-randomized studies (minors): development and validation of a new instrument. *ANZ J Surg*. 2003;73:712-6.

[26] Sterne JA, Hernán MA, Reeves BC, Savović J, Berkman ND, Viswanathan M, et al. ROBINS-I: a tool for assessing risk of bias in non-randomised studies of interventions. *BMJ (Clinical research ed)*. 2016;355:i4919.

[27] Elliott SP, Coutinho K, Robertson KJ, D'Anna R, Chevli K, Carrier S, et al. One-Year Results for the ROBUST III Randomized Controlled Trial Evaluating the Optilume® Drug-Coated Balloon for Anterior Urethral Strictures. *Journal of urology*. 2022;207:866 - 75.

[28] Virasoro R, DeLong JM, Estrella RE, Pichardo M, Rodriguez Lay R, Espino G, et al. A Drug-Coated Balloon Treatment for Urethral Stricture Disease: Three-Year Results from the ROBUST I Study. *Research and reports in urology*. 2022;14:177-83.

[29] Mohammed SH, Wirima J. Balloon catheter dilatation of urethral strictures. *AJR American journal of roentgenology*. 1988;150:327-30.

[30] Kumano Y, Kawahara T, Mochizuki T, Takamoto D, Takeshima T, Kuroda S, et al. Management of urethral stricture: High-pressure balloon dilation versus optical internal urethrotomy. *LUTS: Lower Urinary Tract Symptoms*. 2019;11:O34-O7.

[31] Yu SC, Wu HY, Wang W, Xu LW, Ding GQ, Zhang ZG, et al. High-pressure balloon dilation for male anterior urethral stricture: single-center experience. *Journal of Zhejiang University: Science B*. 2016;17:722-7.

[32] Beeder LA, Cook GS, Nealon SW, Badkhshan S, Sanders SC, Perito DP, et al. Long-Term Experience with Balloon Dilation for Short Bulbar and Membranous Urethral Strictures: Establishing a Baseline in the Active Drug Treatment Era. *Journal of Clinical Medicine*. 2022;11.

[33] Alibekov MM, Katibov MI, Skorovarov AS, Gazimagomedov GA, Arbuliev KM, Savzikhanov RT, et al. The one-stage balloon dilatation with stone extraction for a combination of short urethral stricture and urethral stone in men. *Vestnik Urologii*. 2021;9:16-24.

[34] Yi YA, Rozanski AT, Shakir NA, Viers BR, Ward EE, Bergeson RL, et al. Balloon dilation performs poorly as a salvage management strategy for recurrent bulbar urethral strictures following failed urethroplasty. *Translational Andrology and Urology*. 2020;9:3-9.

[35] Zhou Y, Li G, Yan J, Shen C, Tang G, Xu G. Combination of the ureteral dilation catheter and balloon catheter under the ureteroscope in the treatment of male urethral stricture. *Zhonghua nan ke xue = National journal of andrology*. 2016;22:42-5.

[36] Chhabra JS, Balaji SS, Singh A, Mishra S, Ganpule AP, Sabnis RB, et al. Urethral Balloon Dilatation: Factors Affecting Outcomes. *Urologia Internationalis*. 2016;96:427-31.

[37] Ishii G, Naruoka T, Kasai K, Hata K, Omono H, Suzuki M, et al. High pressure balloon dilation for vesicourethral anastomotic strictures after radical prostatectomy. *BMC urology*. 2015;15:62.

[38] Mao D, Yeqi N, Lu Y, Yijian L, Fangzhi C, Yinhuai W. Urethral dilatation with nephrostomy balloon dilation catheter for treatment of male patients with urethrostenosis. *Chinese Journal of Andrology*. 2014;28:25-9.

- 1  
2  
3 [39] Vyas JB, Ganpule AP, Muthu V, Sabnis RB, Desai MR. Balloon dilatation for male urethral  
4 strictures "revisited". *Urology Annals*. 2013;5:245-8.
- 5 [40] Alguersuari A, Palaña P, Criado E, Fortuño JR, Falco-Fages JF. Fluoroscopic-guided balloon dilation  
6 for urethral strictures: A feasible and effective approach for an old, unsolved problem. *CardioVascular  
7 and Interventional Radiology*. 2012;35:S279.
- 8 [41] MacDiarmid SA, Harrigan CT, Cottone JL, McIntyre WJ, Johnson DE. Assessment of a new  
9 transurethral balloon dilation catheter in the treatment of urethral stricture disease. *Urology*.  
10 2000;55:408-13.
- 11 [42] Parente A, Angulo JM, Romero RM, Rivas S, Burgos L, Tardáguila A. Management of ureteropelvic  
12 junction obstruction with high-pressure balloon dilatation: long-term outcome in 50 children under 18  
13 months of age. *Urology*. 2013;82:1138-43.
- 14 [43] Kumar P, Nargund VH. Management of post-radical prostatectomy anastomotic stricture by  
15 endoscopic transurethral balloon dilatation. *Scandinavian journal of urology and nephrology*.  
16 2007;41:314-5.
- 17 [44] Liu JS, Walker K, Stein D, Prabhu S, Hofer MD, Han J, et al. Lichen sclerosus and isolated bulbar  
18 urethral stricture disease. *J Urol*. 2014;192:775-9.
- 19 [45] Chung ASJ, Suarez OA. Current treatment of lichen sclerosus and stricture. *World J Urol*.  
20 2020;38:3061-7.
- 21 [46] Searles JM, MacKinnon AE. Home-dilatation of the urethral meatus in boys. *BJU International*,  
22 Supplement. 2004;93:596-7.
- 23 [47] Levine LA, Engebrecht BP. Adjuvant home urethral balloon dilation for the recalcitrant urethral  
24 stricture. *Journal of Urology*. 1997;158:818-21.
- 25 [48] Hennessey DB, Thomas AZ, Forde JC, McDermott TED. Management of recalcitrant urethral  
26 strictures with self-dilatation balloon catheter. *Irish Journal of Medical Science*. 2013;182:227-30.
- 27 [49] Monn MF, Virasoro R, DeLong J, Mc Cammon K. Natural history of patients using self urethral  
28 balloon dilation to manage urethral stricture. *Journal of Urology*. 2021;206:e970-e1.
- 29 [50] Matanhelia SS, Salaman R, John A, Matthews PN. A prospective randomized study of  
30 self-dilatation in the management of urethral strictures. *Journal of the Royal College of Surgeons of  
31 Edinburgh*. 1995;40:295-7.
- 32 [51] Ivaz SL, Veeratterapillay R, Jackson MJ, Harding CK, Dorkin TJ, Andrich DE, et al. Intermittent  
33 self-dilatation for urethral stricture disease in males: A systematic review and meta-analysis.  
34 *Neurourol Urodyn*. 2016;35:759-63.
- 35 [52] Isen K, Nalçacıoğlu V. Direct vision internal urethrotomy by using endoscopic scissors. *Int Urol  
36 Nephrol*. 2015;47:905-8.
- 37 [53] Barbalias D, Lappas G, Ravazoula P, Liourdi D, Kyriazis I, Liatsikos E, et al. Evaluation of the  
38 Distribution of Paclitaxel after Application of a Paclitaxel-Coated Balloon in the Rabbit Urethra.  
39 *Journal of Endourology*. 2018;32:381-6.
- 40 [54] FDA approves the Optilume urethral drug coated balloon for the treatment of urethral strictures.  
41 *BJU international*. 2022;129:305.
- 42 [55] Shin JH, Song HY, Moon DH, Oh SJ, Kim TH, Lim JO. Rhenium-188 mercaptoacetyltriglycine-filled  
43 balloon dilation in the treatment of recurrent urethral strictures: Initial experience with five patients.  
44 *Journal of Vascular and Interventional Radiology*. 2006;17:1471-7.
- 45 [56] Hosseini J, Fallah-Karkan M, Rahavian A, Soleimanzadeh F, Salimi H, Ghadimi K, et al. Feasibility,  
46 complication and long-term follow-up of the newly nelaton based urethral dilation method,  
47  
48  
49  
50  
51  
52  
53  
54  
55  
56  
57  
58  
59  
60



- retrospective study. American journal of clinical and experimental urology. 2019;7:378-83.
- [57] Yildirim E, Cicek T, Istanbuluoglu O, Ozturk B. Use of cutting balloon in the treatment of urethral stricture: A novel technique. CardioVascular and Interventional Radiology. 2009;32:525-8.
- [58] Sur H, Dowson C, Jabbar T, Phillips J, Blacker A. A cost based rationale for redefining the management of urethral strictures. Journal of Endourology. 2012;26:A391-A2.
- [59] Greenwell TJ, Castle C, Andrich DE, MacDonald JT, Nicol DL, Mundy AR. Repeat urethrotomy and dilation for the treatment of urethral stricture are neither clinically effective nor cost-effective. The Journal of urology. 2004;172:275-7.
- [60] Stillwell TJ, Patterson DE, LeRoy AJ. Endoscopic Urethroplasty with Balloon Dilatation for Traumatic Disruption of the Prostatomembranous Urethra. Journal of endourology. 1988;2:257-61.

## Figure legends

Figure 1: Flow diagram of study selection.

Figure 2: Forest plots showing the efficacy of balloon dilation. (A) Success rate of simple balloon dilation; (B) Balloon dilation (Drug-coated balloons excluded) compared with simple dilation, DVIU, and optical internal urethrotomy (OIU). CI, confidence interval.

Figure 3: Forest plots showing the possible influencing factors of balloon dilation. (A) Location of urethral stricture; (B) Length of urethral stricture; (C) Age; (D) Prior endoscopic management. CI, confidence interval.

1  
2  
3  
4  
5  
6  
7  
8  
9  
10  
11  
12  
13  
14  
15  
16  
17  
18  
19  
20  
21  
22  
23  
24  
25  
26  
27  
28  
29  
30  
31  
32  
33  
34  
35  
36  
37  
38  
39  
40  
41  
42  
43  
44  
45  
46  
47  
48  
49  
50  
51  
52  
53  
54  
55  
56  
57  
58  
59  
60

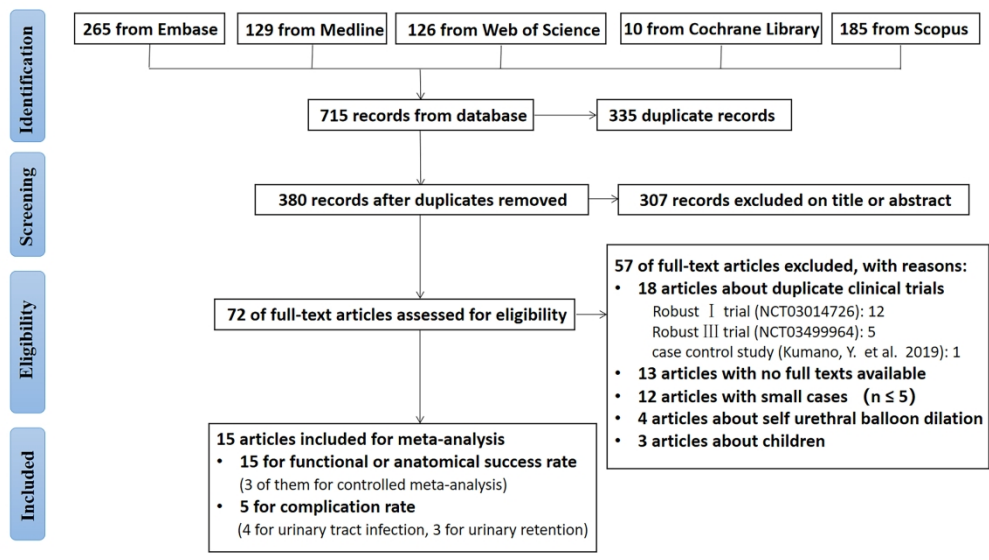

Figure 1: Flow diagram of study selection.

338x190mm (300 x 300 DPI)



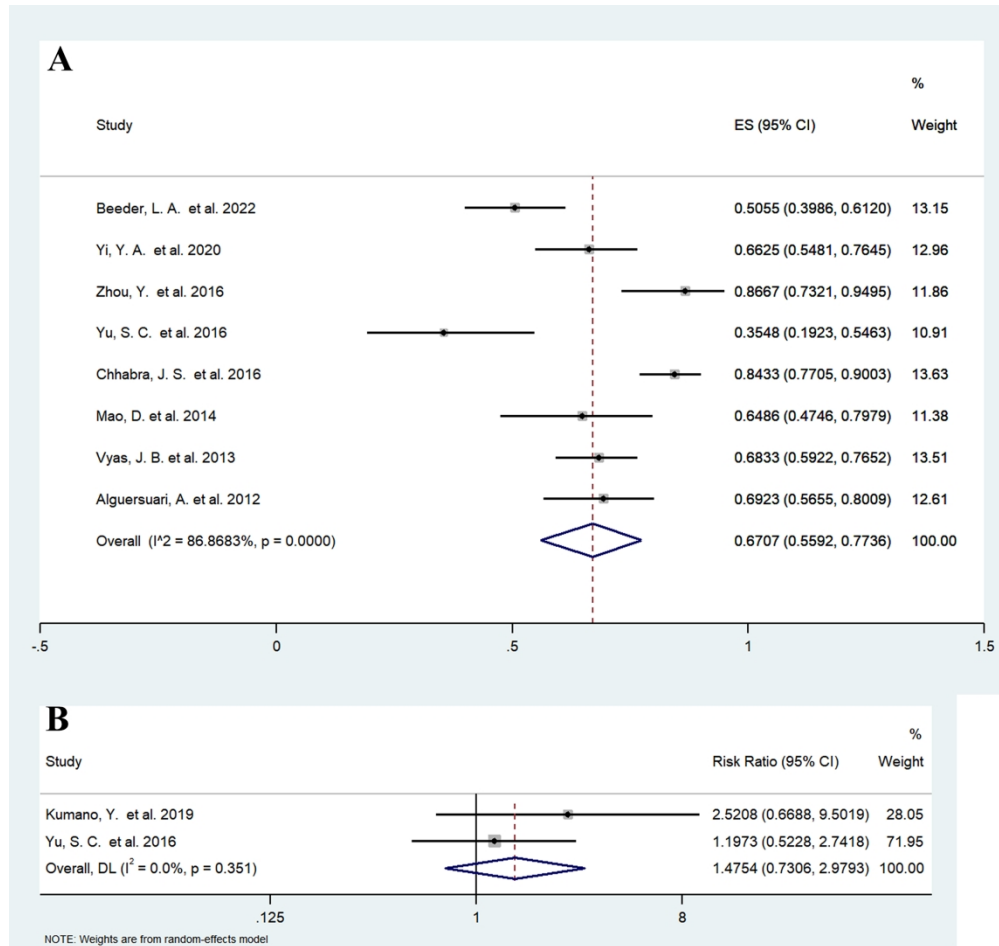

Figure 2: Forest plots showing the efficacy of balloon dilation. (A) Success rate of simple balloon dilation; (B) Balloon dilation (Drug-coated balloons excluded) compared with simple dilation, DVIU, and optical internal urethrotomy (OIU). CI, confidence interval.

209x198mm (300 x 300 DPI)

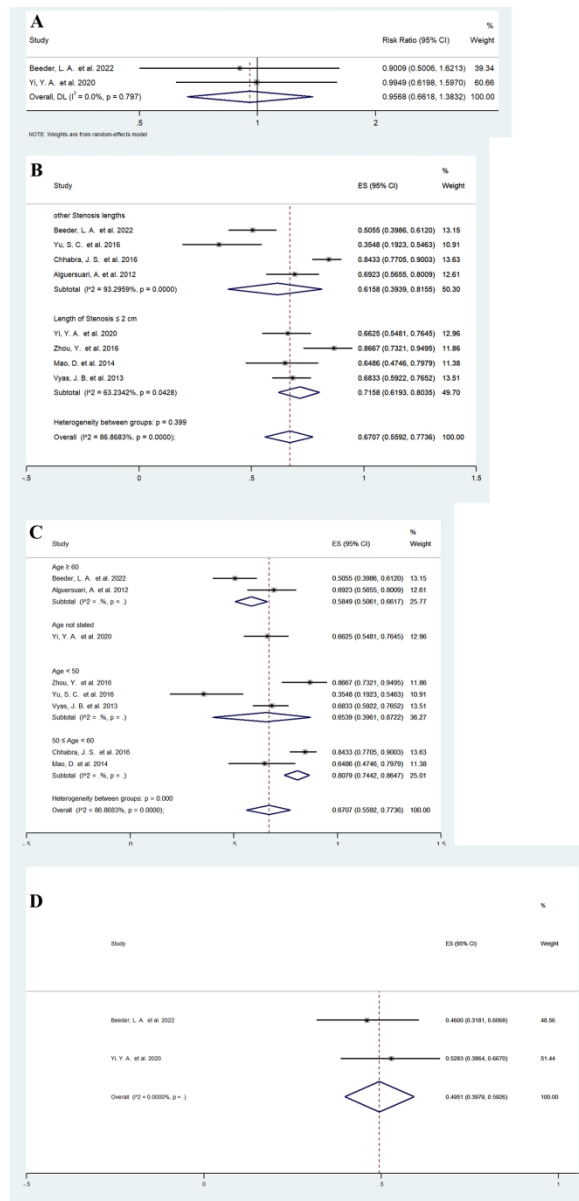

Figure 3: Forest plots showing the possible influencing factors of balloon dilation. (A) Location of urethral stricture; (B) Length of urethral stricture; (C) Age; (D) Prior endoscopic management. CI, confidence interval.

144x297mm (300 x 300 DPI)

### Supplementary File. Search strategy

(Urethral Stricture OR Stricture, Urethral OR Strictures, Urethral OR Urethral Strictures OR Urethral Stenosis OR Stenoses, Urethral OR Stenosis, Urethral OR Urethral Stenoses OR Anterior Urethral Stricture OR Anterior Urethral Strictures OR Urethral Strictures, Anterior OR Urethral Stricture, Anterior OR Posterior Urethral Stricture OR Posterior Urethral Strictures OR Urethral Strictures, Posterior OR Urethral Stricture, Posterior) AND (Dilatation OR Dilatations OR Dilation OR Dilations) AND (Balloon)

#### MEDLINE

#1. TS=(Urethral Stricture OR Stricture, Urethral OR Strictures, Urethral OR Urethral Strictures OR Urethral Stenosis OR Stenoses, Urethral OR Stenosis, Urethral OR Urethral Stenoses OR Anterior Urethral Stricture OR Anterior Urethral Strictures OR Urethral Strictures, Anterior OR Urethral Stricture, Anterior OR Posterior Urethral Stricture OR Posterior Urethral Strictures OR Urethral Strictures, Posterior OR Urethral Stricture, Posterior)

#2. TS=(Dilatation OR Dilatations OR Dilation OR Dilations)

#3. TS=(Balloon)

#1 AND #2 AND #3

#### Web of Science (WOS)

#1. TS=(Urethral Stricture OR Stricture, Urethral OR Strictures, Urethral OR Urethral Strictures OR Urethral Stenosis OR Stenoses, Urethral OR Stenosis, Urethral OR Urethral Stenoses OR Anterior Urethral Stricture OR Anterior Urethral Strictures OR Urethral Strictures, Anterior OR Urethral Stricture, Anterior OR Posterior Urethral Stricture OR Posterior Urethral Strictures OR Urethral Strictures, Posterior OR Urethral Stricture, Posterior)

#2. TS=(Dilatation OR Dilatations OR Dilation OR Dilations)

#3. TS=(Balloon)

#1 AND #2 AND #3

#### EMBASE

#1. 'Stricture, Urethral':ab,ti OR 'Strictures, Urethral':ab,ti OR 'Urethral Strictures':ab,ti OR 'Urethral Stenosis':ab,ti OR 'Stenoses, Urethral':ab,ti OR 'Stenosis, Urethral':ab,ti OR 'Urethral Stenoses':ab,ti OR 'Anterior Urethral Stricture':ab,ti OR 'Anterior Urethral Strictures':ab,ti OR 'Urethral Strictures, Anterior':ab,ti OR 'Urethral Stricture, Anterior':ab,ti OR 'Posterior Urethral Stricture':ab,ti OR 'Posterior Urethral Strictures':ab,ti OR 'Urethral Strictures, Posterior':ab,ti OR 'Urethral Stricture, Posterior':ab,ti

#2. 'Dilatation':ab,ti OR 'Dilatations':ab,ti OR 'Dilation':ab,ti OR 'Dilations':ab,ti

#3. 'Balloon':ab,ti

#1 AND #2 AND #3

#### Cochrane Library

#1. (Urethral Stricture):ti,ab OR (Strictures, Urethral):ti,ab OR (Stricture, Urethral):ti,ab OR (Urethral Strictures):ti,ab OR (Urethral Stenosis):ti,ab OR (Stenoses, Urethral):ti,ab OR (Stenosis, Urethral):ti,ab OR (Urethral Stenoses):ti,ab OR (Anterior Urethral Stricture):ti,ab OR (Anterior

1  
2  
3 Urethral Strictures):ti,ab OR (Urethral Strictures, Anterior):ti,ab OR (Urethral Stricture,  
4 Anterior):ti,ab OR (Posterior Urethral Stricture):ti,ab OR (Posterior Urethral Strictures):ti,ab OR  
5 (Urethral Strictures, Posterior):ti,ab OR (Urethral Stricture, Posterior):ti,ab  
6  
7 #2. (Dilatations):ti,ab OR (Dilatation):ti,ab OR (Dilation):ti,ab OR (Dilations):ti,ab  
8  
9 #3. (Balloon):ti,ab  
10 **#1 AND #2 AND #3**

### Scopus

11  
12  
13  
14 #1. TITLE-ABS-KEY("Urethral Stricture" OR "Stricture, Urethral" OR "Strictures, Urethral" OR  
15 "Urethral Strictures" OR "Urethral Stenosis" OR "Stenoses, Urethral" OR "Stenosis, Urethral" OR  
16 "Urethral Stenoses" OR "Anterior Urethral Stricture" OR "Anterior Urethral Strictures" OR  
17 "Urethral Strictures, Anterior" OR "Urethral Stricture, Anterior" OR "Posterior Urethral Stricture"  
18 OR "Posterior Urethral Strictures" OR "Urethral Strictures, Posterior" OR "Urethral Stricture,  
19 Posterior")  
20  
21 #2. TITLE-ABS-KEY( "Dilatation" OR "Dilatations" OR "Dilation" OR "Dilations")  
22  
23 #3. TITLE-ABS-KEY("Balloon")  
24 **#1 AND #2 AND #3**

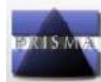

## PRISMA 2020 Checklist

1  
2  
3  
4  
5  
6  
7  
8  
9  
10  
11  
12  
13  
14  
15  
16  
17  
18  
19  
20  
21  
22  
23  
24  
25  
26  
27  
28  
29  
30  
31  
32  
33  
34  
35  
36  
37  
38  
39  
40  
41  
42  
43  
44  
45  
46  
47

| Section and Topic             | Item # | Checklist item                                                                                                                                                                                                                                                                                       | Reported on page # |
|-------------------------------|--------|------------------------------------------------------------------------------------------------------------------------------------------------------------------------------------------------------------------------------------------------------------------------------------------------------|--------------------|
| <b>TITLE</b>                  |        |                                                                                                                                                                                                                                                                                                      |                    |
| Title                         | 1      | Identify the report as a systematic review, meta-analysis, or both.                                                                                                                                                                                                                                  | 1                  |
| <b>ABSTRACT</b>               |        |                                                                                                                                                                                                                                                                                                      |                    |
| Abstract                      | 2      | See the PRISMA 2020 for Abstracts checklist.                                                                                                                                                                                                                                                         | 2                  |
| <b>INTRODUCTION</b>           |        |                                                                                                                                                                                                                                                                                                      |                    |
| Rationale                     | 3      | Describe the rationale for the review in the context of existing knowledge.                                                                                                                                                                                                                          | 3                  |
| Objectives                    | 4      | Provide an explicit statement of the objective(s) or question(s) the review addresses.                                                                                                                                                                                                               | 3                  |
| <b>METHODS</b>                |        |                                                                                                                                                                                                                                                                                                      |                    |
| Eligibility criteria          | 5      | Specify the inclusion and exclusion criteria for the review and how studies were grouped for the syntheses.                                                                                                                                                                                          | 4                  |
| Information sources           | 6      | Specify all databases, registers, websites, organisations, reference lists and other sources searched or consulted to identify studies. Specify the date when each source was last searched or consulted.                                                                                            | 4                  |
| Search strategy               | 7      | Present the full search strategies for all databases, registers and websites, including any filters and limits used.                                                                                                                                                                                 | 4                  |
| Selection process             | 8      | Specify the methods used to decide whether a study met the inclusion criteria of the review, including how many reviewers screened each record and each report retrieved, whether they worked independently, and if applicable, details of automation tools used in the process.                     | 4                  |
| Data collection process       | 9      | Specify the methods used to collect data from reports, including how many reviewers collected data from each report, whether they worked independently, any processes for obtaining or confirming data from study investigators, and if applicable, details of automation tools used in the process. | 4                  |
| Data items                    | 10a    | List and define all outcomes for which data were sought. Specify whether all results that were compatible with each outcome domain in each study were sought (e.g. for all measures, time points, analyses), and if not, the methods used to decide which results to collect.                        | 4                  |
|                               | 10b    | List and define all other variables for which data were sought (e.g. participant and intervention characteristics, funding sources). Describe any assumptions made about any missing or unclear information.                                                                                         | 4                  |
| Study risk of bias assessment | 11     | Specify the methods used to assess risk of bias in the included studies, including details of the tool(s) used, how many reviewers assessed each study and whether they worked independently, and if applicable, details of automation tools used in the process.                                    | 4                  |
| Effect measures               | 12     | Specify for each outcome the effect measure(s) (e.g. risk ratio, mean difference) used in the synthesis or presentation of results.                                                                                                                                                                  | 4                  |
| Synthesis methods             | 13a    | Describe the processes used to decide which studies were eligible for each synthesis (e.g. tabulating the study intervention characteristics and comparing against the planned groups for each synthesis (item #5)).                                                                                 | 4, 5               |
|                               | 13b    | Describe any methods required to prepare the data for presentation or synthesis, such as handling of missing summary statistics, or data conversions.                                                                                                                                                | 4, 5               |
|                               | 13c    | Describe any methods used to tabulate or visually display results of individual studies and syntheses.                                                                                                                                                                                               | 4, 5               |
|                               | 13d    | Describe any methods used to synthesize results and provide a rationale for the choice(s). If meta-analysis was performed, describe the model(s), method(s) to identify the presence and extent of statistical heterogeneity, and software package(s) used.                                          | 4, 5               |
|                               | 13e    | Describe any methods used to explore possible causes of heterogeneity among study results (e.g. subgroup analysis, meta-regression).                                                                                                                                                                 | 4, 5               |
|                               | 13f    | Describe any sensitivity analyses conducted to assess robustness of the synthesized results.                                                                                                                                                                                                         | NA                 |
| Reporting bias assessment     | 14     | Describe any methods used to assess risk of bias due to missing results in a synthesis (arising from reporting biases).                                                                                                                                                                              | 4                  |
| Certainty assessment          | 15     | Describe any methods used to assess certainty (or confidence) in the body of evidence for an outcome.<br>For peer review only - <a href="http://bmjopen.bmj.com/site/about/guidelines.xhtml">http://bmjopen.bmj.com/site/about/guidelines.xhtml</a>                                                  | 4                  |

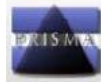

## PRISMA 2020 Checklist

1  
2  
3  
4  
5  
6  
7  
8  
9  
10  
11  
12  
13  
14  
15  
16  
17  
18  
19  
20  
21  
22  
23  
24  
25  
26  
27  
28  
29  
30  
31  
32  
33  
34  
35  
36  
37  
38  
39  
40  
41  
42  
43  
44  
45  
46  
47

| Section and Topic                              | Item # | Checklist item                                                                                                                                                                                                                                                                       | Reported on page # |
|------------------------------------------------|--------|--------------------------------------------------------------------------------------------------------------------------------------------------------------------------------------------------------------------------------------------------------------------------------------|--------------------|
| <b>RESULTS</b>                                 |        |                                                                                                                                                                                                                                                                                      |                    |
| Study selection                                | 16a    | Describe the results of the search and selection process, from the number of records identified in the search to the number of studies included in the review, ideally using a flow diagram.                                                                                         | 5                  |
|                                                | 16b    | Cite studies that might appear to meet the inclusion criteria, but which were excluded, and explain why they were excluded.                                                                                                                                                          | 5                  |
| Study characteristics                          | 17     | Cite each included study and present its characteristics.                                                                                                                                                                                                                            | 5                  |
| Risk of bias in studies                        | 18     | Present assessments of risk of bias for each included study.                                                                                                                                                                                                                         | 5                  |
| Results of individual studies                  | 19     | For all outcomes, present, for each study: (a) summary statistics for each group (where appropriate) and (b) an effect estimate and its precision (e.g. confidence/credible interval), ideally using structured tables or plots.                                                     | 6, 7, 8, 9         |
| Results of syntheses                           | 20a    | For each synthesis, briefly summarise the characteristics and risk of bias among contributing studies.                                                                                                                                                                               | 6, 7, 8, 9         |
|                                                | 20b    | Present results of all statistical syntheses conducted. If meta-analysis was done, present for each the summary estimate and its precision (e.g. confidence/credible interval) and measures of statistical heterogeneity. If comparing groups, describe the direction of the effect. | 6, 7, 8, 9         |
|                                                | 20c    | Present results of all investigations of possible causes of heterogeneity among study results.                                                                                                                                                                                       | 6, 7, 8, 9         |
|                                                | 20d    | Present results of all sensitivity analyses conducted to assess the robustness of the synthesized results.                                                                                                                                                                           | NA                 |
| Reporting biases                               | 21     | Present assessments of risk of bias due to missing results (arising from reporting biases) for each synthesis assessed.                                                                                                                                                              | 6, 7, 8, 9         |
| Certainty of evidence                          | 22     | Present assessments of certainty (or confidence) in the body of evidence for each outcome assessed.                                                                                                                                                                                  | 6, 7, 8, 9         |
| <b>DISCUSSION</b>                              |        |                                                                                                                                                                                                                                                                                      |                    |
| Discussion                                     | 23a    | Provide a general interpretation of the results in the context of other evidence.                                                                                                                                                                                                    | 10                 |
|                                                | 23b    | Discuss any limitations of the evidence included in the review.                                                                                                                                                                                                                      | 10                 |
|                                                | 23c    | Discuss any limitations of the review processes used.                                                                                                                                                                                                                                | 11                 |
|                                                | 23d    | Discuss implications of the results for practice, policy, and future research.                                                                                                                                                                                                       | 10, 11             |
| <b>OTHER INFORMATION</b>                       |        |                                                                                                                                                                                                                                                                                      |                    |
| Registration and protocol                      | 24a    | Provide registration information for the review, including register name and registration number, or state that the review was not registered.                                                                                                                                       | 2, 4               |
|                                                | 24b    | Indicate where the review protocol can be accessed, or state that a protocol was not prepared.                                                                                                                                                                                       | 2, 4               |
|                                                | 24c    | Describe and explain any amendments to information provided at registration or in the protocol.                                                                                                                                                                                      | NA                 |
| Support                                        | 25     | Describe sources of financial or non-financial support for the review, and the role of the funders or sponsors in the review.                                                                                                                                                        | 12                 |
| Competing interests                            | 26     | Declare any competing interests of review authors.                                                                                                                                                                                                                                   | 11                 |
| Availability of data, code and other materials | 27     | Report which of the following are publicly available and where they can be found: template data collection forms; data extracted from included studies; data used for all analyses; analytic code; any other materials used in the review.                                           | 12                 |

From: Page MJ, McKenzie JE, Bossuyt PM, Boutron I, Hoffmann TC, Mulrow CD, et al. The PRISMA 2020 statement: an updated guideline for reporting systematic reviews. *BMJ* 2021;372:n71. doi: 10.1136/bmj.n71

For peer review only - <http://bmjopen.bmj.com/site/about/guidelines.xhtml>  
For more information, visit: <http://www.prisma-statement.org>

Supplementary Table 2: The main characteristics of included studies.

| Study                    | Year | Country                         | Type of Study             | Article Type        | NOS Score (0-9) | Jadad Score (0-7) | MINORS Score (0-24) |
|--------------------------|------|---------------------------------|---------------------------|---------------------|-----------------|-------------------|---------------------|
| Virasoro, Ramon et al.   | 2022 | USA, Dominican Republic, Panama | Single-arm Clinical Trial | Journal article     | /               | /                 | 10                  |
| Elliott, S. P. et al.    | 2022 | USA, Canada                     | RCT                       | Journal article     | /               | 5                 | /                   |
| Beeder, L. A. et al.     | 2022 | USA                             | Retrospective Case Study  | Journal article     | 3               | /                 | /                   |
| Alibekov, M. M. et al.   | 2021 | Russia                          | Retrospective Case Study  | Journal article     | 2               | /                 | /                   |
| Yi, Y. A. et al.         | 2020 | USA                             | Retrospective Case Study  | Journal article     | 3               | /                 | /                   |
| Kumano, Y. et al.        | 2019 | Japan                           | Case Control Study        | Journal article     | 5               | /                 | /                   |
| Zhou, Y. et al.          | 2016 | China                           | Retrospective Case Study  | Journal article     | 2               | /                 | /                   |
| Yu, S. C. et al.         | 2016 | China                           | Case Control Study        | Journal article     | 6               | /                 | /                   |
| Chhabra, J. S. et al.    | 2016 | India                           | Retrospective Case Study  | Journal article     | 3               | /                 | /                   |
| Ishii, Gen et al.        | 2015 | Japan                           | Retrospective Case Study  | Journal article     | 3               | /                 | /                   |
| Mao, D. et al.           | 2014 | China                           | Retrospective Case Study  | Journal article     | 2               | /                 | /                   |
| Vyas, J. B. et al.       | 2013 | India                           | Retrospective Case Study  | Journal article     | 3               | /                 | /                   |
| Alguersuari, A. et al.   | 2012 | Spain                           | Retrospective Case Study  | Conference abstract | 2               | /                 | /                   |
| MacDiarmid, S. A. et al. | 2000 | USA                             | Retrospective Case Study  | Journal article     | 2               | /                 | /                   |
| Mohammed, S. H. et al.   | 1988 | Denmark                         | Single-arm Clinical Trial | Journal article     | /               | /                 | 6                   |

NOS, Newcastle Ottawa Scale; MINORS, Methodological Index for Non-randomized Studies.

Supplementary Table 3A. Description and decision criteria for each domain in ROBINS-I

| Bias domain                                      | Explanation                                                                                                                                                                                                                                                                                                                                                                                                                                                                                                                                                                                                                                                                                                                                                                                                                                                                                                                                                                  | Judgments                                                                                                                                                                                                                                                                                                                                                                                                                                                                                                                                                                                                                                                                                                                                                                                                                                                                                                                                                                                         |
|--------------------------------------------------|------------------------------------------------------------------------------------------------------------------------------------------------------------------------------------------------------------------------------------------------------------------------------------------------------------------------------------------------------------------------------------------------------------------------------------------------------------------------------------------------------------------------------------------------------------------------------------------------------------------------------------------------------------------------------------------------------------------------------------------------------------------------------------------------------------------------------------------------------------------------------------------------------------------------------------------------------------------------------|---------------------------------------------------------------------------------------------------------------------------------------------------------------------------------------------------------------------------------------------------------------------------------------------------------------------------------------------------------------------------------------------------------------------------------------------------------------------------------------------------------------------------------------------------------------------------------------------------------------------------------------------------------------------------------------------------------------------------------------------------------------------------------------------------------------------------------------------------------------------------------------------------------------------------------------------------------------------------------------------------|
| Bias due to confounding                          | <ol style="list-style-type: none"> <li>1. Is there potential for confounding of the effect of intervention in this study?</li> <li>2. Did the authors use a multivariable-adjusted analysis method that controlled at least for the important confounding domains (age, body mass index, etiology, location of the stricture, length of the stricture, prior intervention management, others) ?</li> <li>3. Were confounding domains that were controlled for measured validly and reliably by the variables available in this study?</li> <li>4. Did the authors control for any post-intervention variables that could have been affected by the intervention?</li> <li>5. Did the authors use an appropriate analysis method that controlled for all the important confounding domains and for time-varying confounding?</li> <li>6. Were confounding domains that were controlled for measured validly and reliably by the variables available in this study?</li> </ol> | <ol style="list-style-type: none"> <li>1. Low risk of bias: No bias expected due to confounding, including time-varying confounding.</li> <li>2. Moderate risk of bias: Confounding is expected: including at least 5 factors of the following factors: age, body mass index, etiology, location of the stricture, length of the stricture, prior intervention management, others (i.e. comorbidities, socio-economic status) and have been appropriately controlled for in a multivariable-adjusted analysis.</li> <li>3. Serious risk of bias: 3-4 above-mentioned factors were measured or appropriately controlled for.</li> <li>4. Critical risk of bias: less than 3 above-mentioned factors were measured or appropriately controlled for.</li> <li>5. No information: No information on which confounders have been controlled for.</li> </ol>                                                                                                                                            |
| Bias in selection of participants into the study | <ol style="list-style-type: none"> <li>1. Was selection of participants into the study based on participant characteristics observed after the start of intervention?</li> <li>2. Were the post-intervention variables that influenced selection likely to be associated with intervention?</li> <li>3. Were the postintervention variables that influenced selection likely to be influenced by the outcome or a cause of the outcome?</li> <li>4. Do start of follow-up and start of intervention coincide for most participants?</li> <li>5. Were adjustment techniques used that are likely to correct for the presence of selection biases?</li> </ol>                                                                                                                                                                                                                                                                                                                  | <ol style="list-style-type: none"> <li>1. Low risk of bias: All participants who would have been eligible for the target study were included in the study.</li> <li>2. Moderate risk of bias: Selection into the study may have been related to exposure and outcome and the authors used appropriate methods to correct for the selection bias.</li> <li>3. Serious risk of bias: Selection into the study was related to intervention and outcome and this could not be corrected for in the analyses; or the start of follow-up and start of exposure do not coincide and the rate ratio is not constant over time.</li> <li>4. Critical risk of bias: Selection into the study was very strongly related to intervention and outcome and this could not be corrected for in the analyses; or a substantial amount of follow-up time is likely to be missing from analyses 3.the rate ratio is not constant over time.</li> <li>5. No information: No information is reported about</li> </ol> |



|                                                    |                                                                                                                                                                                                                                                                                                                                                                                                             |                                                                                                                                                                                                                                                                                                                                                                                                                                                                                                                                                                                                                                                                                                                                                                                                                                                                                                    |
|----------------------------------------------------|-------------------------------------------------------------------------------------------------------------------------------------------------------------------------------------------------------------------------------------------------------------------------------------------------------------------------------------------------------------------------------------------------------------|----------------------------------------------------------------------------------------------------------------------------------------------------------------------------------------------------------------------------------------------------------------------------------------------------------------------------------------------------------------------------------------------------------------------------------------------------------------------------------------------------------------------------------------------------------------------------------------------------------------------------------------------------------------------------------------------------------------------------------------------------------------------------------------------------------------------------------------------------------------------------------------------------|
|                                                    |                                                                                                                                                                                                                                                                                                                                                                                                             | selection of participants into the study.                                                                                                                                                                                                                                                                                                                                                                                                                                                                                                                                                                                                                                                                                                                                                                                                                                                          |
| Bias in classification of interventions            | <ol style="list-style-type: none"> <li>1. Were intervention groups clearly defined?</li> <li>2. Was the information used to define intervention groups recorded at the start of the intervention?</li> <li>3. Could classification of intervention status have been affected by knowledge of the outcome or risk of the outcome?</li> </ol>                                                                 | <ol style="list-style-type: none"> <li>1. Low risk of bias: The patient clearly underwent urethral balloon dilation, and no measurement error is expected in its assessment.</li> <li>2. Moderate risk of bias: Intervention status is well defined and some aspects of the assignments of intervention status were determined retrospectively.</li> <li>3. Serious risk of bias: Intervention status is not well defined; or major aspects of the assignments of intervention status were determined in a way that could have been affected by knowledge of the outcome.</li> <li>4. Critical risk of bias: An extremely high amount of misclassification of intervention status (i.e. because of unusually strong recall biases).</li> <li>5. No information: No definition of the intervention or no explanation of the source of information about intervention status is reported.</li> </ol> |
| Bias due to deviations from intended interventions | <ol style="list-style-type: none"> <li>1. Were there deviations from the intended intervention beyond what would be expected in usual practice?</li> <li>2. Were these deviations from intended intervention unbalanced between groups and likely to have affected the outcome?</li> </ol>                                                                                                                  | <ol style="list-style-type: none"> <li>1. Low risk of bias: Patients did not receive other invasive urethral stricture treatments between the time they underwent balloon dilatation and the follow-up period to assess success.</li> <li>2. Moderate risk of bias: There were deviations from usual practice, but their impact on the outcome is expected to be slight.</li> <li>3. Serious or critical risk of bias: There were deviations from usual practice that were unbalanced between the intervention groups and likely to have affected the outcome.</li> <li>4. Critical risk of bias: There were substantial deviations from usual practice that were unbalanced between the intervention groups and likely to have affected the outcome.</li> <li>5. No information: No information on deviations from the intervention is reported.</li> </ol>                                       |
| Bias due to missing data                           | <ol style="list-style-type: none"> <li>1. Were outcome data available for all, or nearly all, participants?</li> <li>2. Were participants excluded due to missing data on intervention status?</li> <li>3. Were participants excluded due to missing data on other variables needed for the analysis?</li> <li>4. Are the proportion of participants and reasons for missing data similar across</li> </ol> | <ol style="list-style-type: none"> <li>1. Low risk of bias: Little loss-to-follow-up and data on intervention and other variables were reasonably complete (&lt;10% missing data) and was unlikely to introduce bias; or the analysis addressed missing data and is likely to have removed any risk of bias.</li> <li>2. Moderate risk of bias: There is a proportion of missing data in the original cohort or a high proportion of loss-to-follow-up; and the analysis is unlikely to have removed the risk of bias arising</li> </ol>                                                                                                                                                                                                                                                                                                                                                           |

|                                                 |                                                                                                                                                                                                                                                                                                                                                                                             |                                                                                                                                                                                                                                                                                                                                                                                                                                                                                                                                                                                                                                                                                                                                                                                                                                                                                                                                                                                                                                                                                                                                                                                                                                                                                                                    |
|-------------------------------------------------|---------------------------------------------------------------------------------------------------------------------------------------------------------------------------------------------------------------------------------------------------------------------------------------------------------------------------------------------------------------------------------------------|--------------------------------------------------------------------------------------------------------------------------------------------------------------------------------------------------------------------------------------------------------------------------------------------------------------------------------------------------------------------------------------------------------------------------------------------------------------------------------------------------------------------------------------------------------------------------------------------------------------------------------------------------------------------------------------------------------------------------------------------------------------------------------------------------------------------------------------------------------------------------------------------------------------------------------------------------------------------------------------------------------------------------------------------------------------------------------------------------------------------------------------------------------------------------------------------------------------------------------------------------------------------------------------------------------------------|
|                                                 | <p>interventions?</p> <p>5. Is there evidence that results were robust to the presence of missing data?</p>                                                                                                                                                                                                                                                                                 | <p>from the missing data (i.e. using logistic regression).</p> <p>3. Serious risk of bias: High proportions (&gt;50%) of missing data; and the analysis is unlikely to have removed the risk of bias arising from the missing data; or missing data were addressed inappropriately in the analysis; or the nature of the missing data means that the risk of bias cannot be removed through appropriate analysis.</p> <p>4. Critical risk of bias: There were critical differences between interventions in participants with missing data; and missing data were not, or could not, be addressed through appropriate analysis.</p> <p>5. No information: No information is reported about missing data or the potential for data to be missing.</p>                                                                                                                                                                                                                                                                                                                                                                                                                                                                                                                                                               |
| <p>Bias in measurement of outcomes</p>          | <p>1. Could the outcome measure have been influenced by knowledge of the intervention received?</p> <p>2. Were outcome assessors aware of the intervention received by study participants?</p> <p>3. Were the methods of outcome assessment comparable across intervention groups?</p> <p>4. Were any systematic errors in measurement of the outcome related to intervention received?</p> | <p>1. Low risk of bias: The methods of outcome assessment were comparable across intervention groups; and the outcome measure was unlikely to be influenced by knowledge of the intervention status of study participants; and any error in measuring the outcome is unrelated to intervention status (i.e., objective measures such as confirmed medical records, record linkage).</p> <p>2. Moderate risk of bias: The methods of outcome assessment were comparable across intervention groups; and any error in measuring the outcome may be minimally related to intervention status or if the outcome measure was not reliably measured (i.e. confirmed records are not available for the whole study population).</p> <p>3. Serious risk of bias: The methods of outcome assessment were not comparable across intervention groups; or the outcome measure was subjective (i.e. vulnerable to influence by knowledge of the intervention received by study participants); and error in measuring the outcome was related to intervention status.</p> <p>4. Critical risk of bias: The methods of outcome assessment were so different that they cannot reasonably be compared across intervention groups.</p> <p>5. No information: No information is reported about the methods of outcome assessment.</p> |
| <p>Bias in selection of the reported result</p> | <p>1. Is the reported effect estimate likely to be selected from multiple analyses of the intervention-outcome relationship?</p>                                                                                                                                                                                                                                                            | <p>1. Low risk of bias: There is a clear description of all analyses and the analyses are consistent and all reported results correspond to all intended outcomes,</p>                                                                                                                                                                                                                                                                                                                                                                                                                                                                                                                                                                                                                                                                                                                                                                                                                                                                                                                                                                                                                                                                                                                                             |

|  |                                                                                           |                                                                                                                                                                                                                                                                                                                                                                                                                                                                                                                                                                                                                                                                                                                                                                                                                                                                                                    |
|--|-------------------------------------------------------------------------------------------|----------------------------------------------------------------------------------------------------------------------------------------------------------------------------------------------------------------------------------------------------------------------------------------------------------------------------------------------------------------------------------------------------------------------------------------------------------------------------------------------------------------------------------------------------------------------------------------------------------------------------------------------------------------------------------------------------------------------------------------------------------------------------------------------------------------------------------------------------------------------------------------------------|
|  | <p>2. Is the reported effect estimate likely to be selected from different subgroups?</p> | <p>analyses and sub-cohorts.</p> <p>2. Moderate risk of bias: The analyses are clearly defined; and there is an indication of selection of the reported analysis from among multiple analyses; and there is an indication of selection of the cohort or subgroups for analysis and reporting on the basis of the results (i.e. estimates not shown for all analyses).</p> <p>3. Serious risk of bias: There is a high risk of selective reporting from among multiple analyses; or the cohort or subgroup is selected from a larger study for analysis and appears to be reported based on the results.</p> <p>4. Critical risk of bias: There is evidence or strong suspicion of selective reporting of results; and the unreported results are likely to be substantially different from the reported results.</p> <p>5. No information: There is too little information to make a judgment.</p> |
|--|-------------------------------------------------------------------------------------------|----------------------------------------------------------------------------------------------------------------------------------------------------------------------------------------------------------------------------------------------------------------------------------------------------------------------------------------------------------------------------------------------------------------------------------------------------------------------------------------------------------------------------------------------------------------------------------------------------------------------------------------------------------------------------------------------------------------------------------------------------------------------------------------------------------------------------------------------------------------------------------------------------|

### Overall judgment

1. Low risk of bias

The study is judged to be at a low risk of bias for all domains.

2. Moderate risk of bias

The study is judged to be at low or moderate risk of bias for all domains.

3. Serious risk of bias

The study is judged to be at serious risk of bias in at least one domain, but not at critical risk in any domain.

4. Critical risk of bias

The study is judged to be at critical risk of bias in at least one domain.

Supplementary Table 3B. Quality assessment results using the ROBINS-I tool

| Study                         | Bias due to confounding | Bias in selection of participants into the study | Bias in classification of interventions | Bias due to deviations from intended interventions | Bias due to missing data | Bias in measurement of outcomes | Bias in selection of the reported result | Overall judgment |
|-------------------------------|-------------------------|--------------------------------------------------|-----------------------------------------|----------------------------------------------------|--------------------------|---------------------------------|------------------------------------------|------------------|
| Virasoro, Ramon et al. 2022   | Moderate                | Moderate                                         | Low                                     | Low                                                | Moderate                 | Moderate                        | Moderate                                 | Serious          |
| Beeder, L. A. et al. 2022     | Moderate                | Serious                                          | Moderate                                | Low                                                | Low                      | Serious                         | Moderate                                 | Serious          |
| Alibekov, M. M. et al. 2022   | Serious                 | Serious                                          | Moderate                                | Low                                                | Low                      | Serious                         | Serious                                  | Serious          |
| Yi, Y. A. et al. 2020         | Moderate                | Serious                                          | Moderate                                | Low                                                | Low                      | Moderate                        | Moderate                                 | Serious          |
| Umamo, Y. et al. 2019         | Serious                 | Serious                                          | Moderate                                | Low                                                | Low                      | Serious                         | Moderate                                 | Serious          |
| Zhou, Y. et al. 2016          | Moderate                | Serious                                          | Moderate                                | Low                                                | Low                      | Moderate                        | Moderate                                 | Serious          |
| Yu, S. C. et al. 2016         | Moderate                | Serious                                          | Moderate                                | Low                                                | Low                      | Moderate                        | Moderate                                 | Serious          |
| Chhabra, J. S. et al. 2016    | Moderate                | Serious                                          | Moderate                                | Low                                                | Low                      | Moderate                        | Moderate                                 | Serious          |
| Ishii, Gen et al. 2015        | Serious                 | Critical                                         | Moderate                                | Low                                                | Low                      | Serious                         | Moderate                                 | Critical         |
| Mao, D. et al. 2014           | Moderate                | Serious                                          | Moderate                                | Low                                                | Low                      | Moderate                        | Moderate                                 | Serious          |
| Vyas, J. B. et al. 2013       | Serious                 | Serious                                          | Moderate                                | Low                                                | Low                      | Moderate                        | Moderate                                 | Serious          |
| Alguersuari, et al. 2012      | Serious                 | Serious                                          | Moderate                                | Low                                                | Low                      | Serious                         | Serious                                  | Serious          |
| MacDiarmid, S. A. et al. 2000 | Serious                 | Serious                                          | Moderate                                | Low                                                | Moderate                 | Serious                         | Moderate                                 | Serious          |
| Mohammed, S. H. et al. 1988   | Critical                | Serious                                          | Low                                     | Low                                                | Moderate                 | Serious                         | Serious                                  | Critical         |

**Supplementary Table 4: Sensitivity analysis of the pooled results of conventional balloon dilation success rate.**

| <b>Excluded Study</b>       | <b>Pooled Results (%)</b> | <b>95% Confidence Interval</b> |       |
|-----------------------------|---------------------------|--------------------------------|-------|
| Beeder, L. A. et al. 2022   | 69.57                     | 58.61                          | 79.55 |
| Yi, Y. A. et al. 2020       | 67.12                     | 54.10                          | 78.96 |
| Zhou, Y. et al. 2016        | 64.13                     | 52.45                          | 75.03 |
| Yu, S. C. et al. 2016       | 70.64                     | 60.47                          | 79.90 |
| Chhabra, J. S. et al. 2016  | 64.05                     | 53.49                          | 73.99 |
| Mao, D. et al. 2014         | 67.31                     | 54.95                          | 78.59 |
| Vyas, J. B. et al. 2013     | 66.76                     | 53.20                          | 79.09 |
| Alguersuari, A. et al. 2012 | 66.69                     | 53.81                          | 78.45 |

1  
2  
3  
4  
5  
6  
7  
8  
9  
10  
11  
12  
13  
14  
15  
16  
17  
18  
19  
20  
21  
22  
23  
24  
25  
26  
27  
28  
29  
30  
31  
32  
33  
34  
35  
36  
37  
38  
39  
40  
41  
42  
43  
44  
45  
46  
47  
48  
49  
50  
51  
52  
53  
54  
55  
56  
57  
58  
59  
60

Supplementary Figure 1: The funnel plot of conventional balloon dilation success rate.

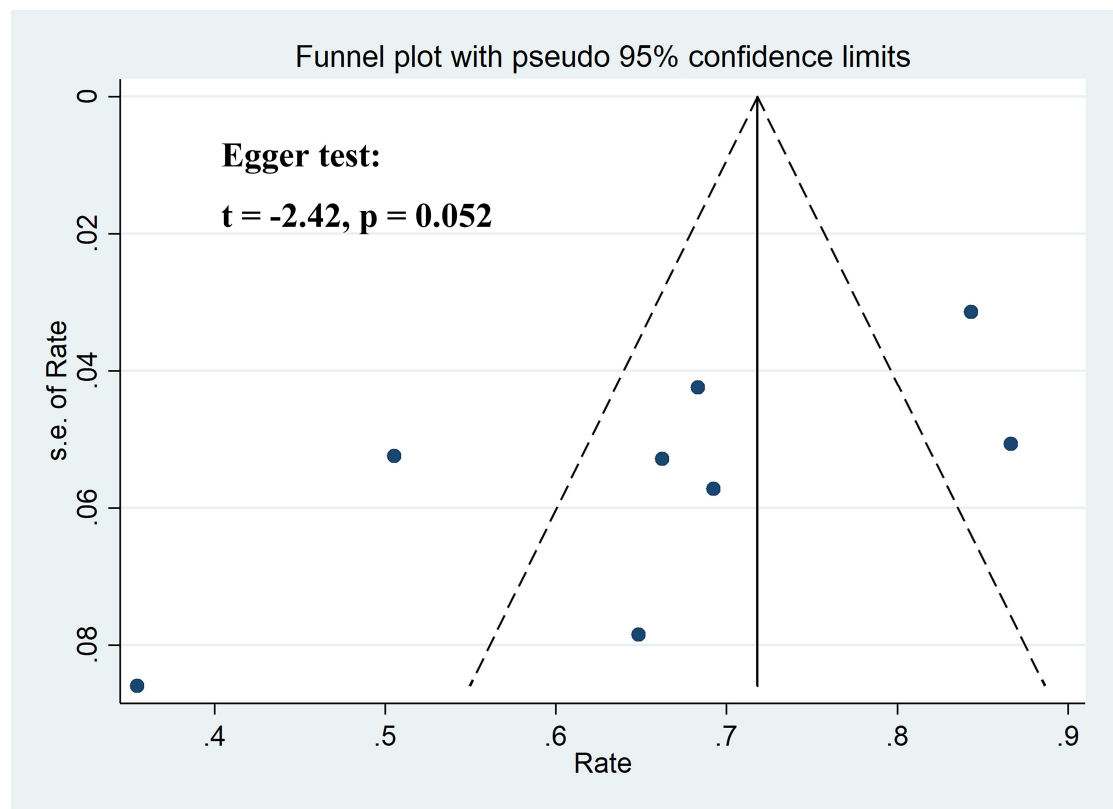

Review only

**Supplementary Figure 2: Forest plots showing the safety of balloon dilation. (A) Incidence of infection; (B) Incidence of urinary retention. CI, confidence interval.**

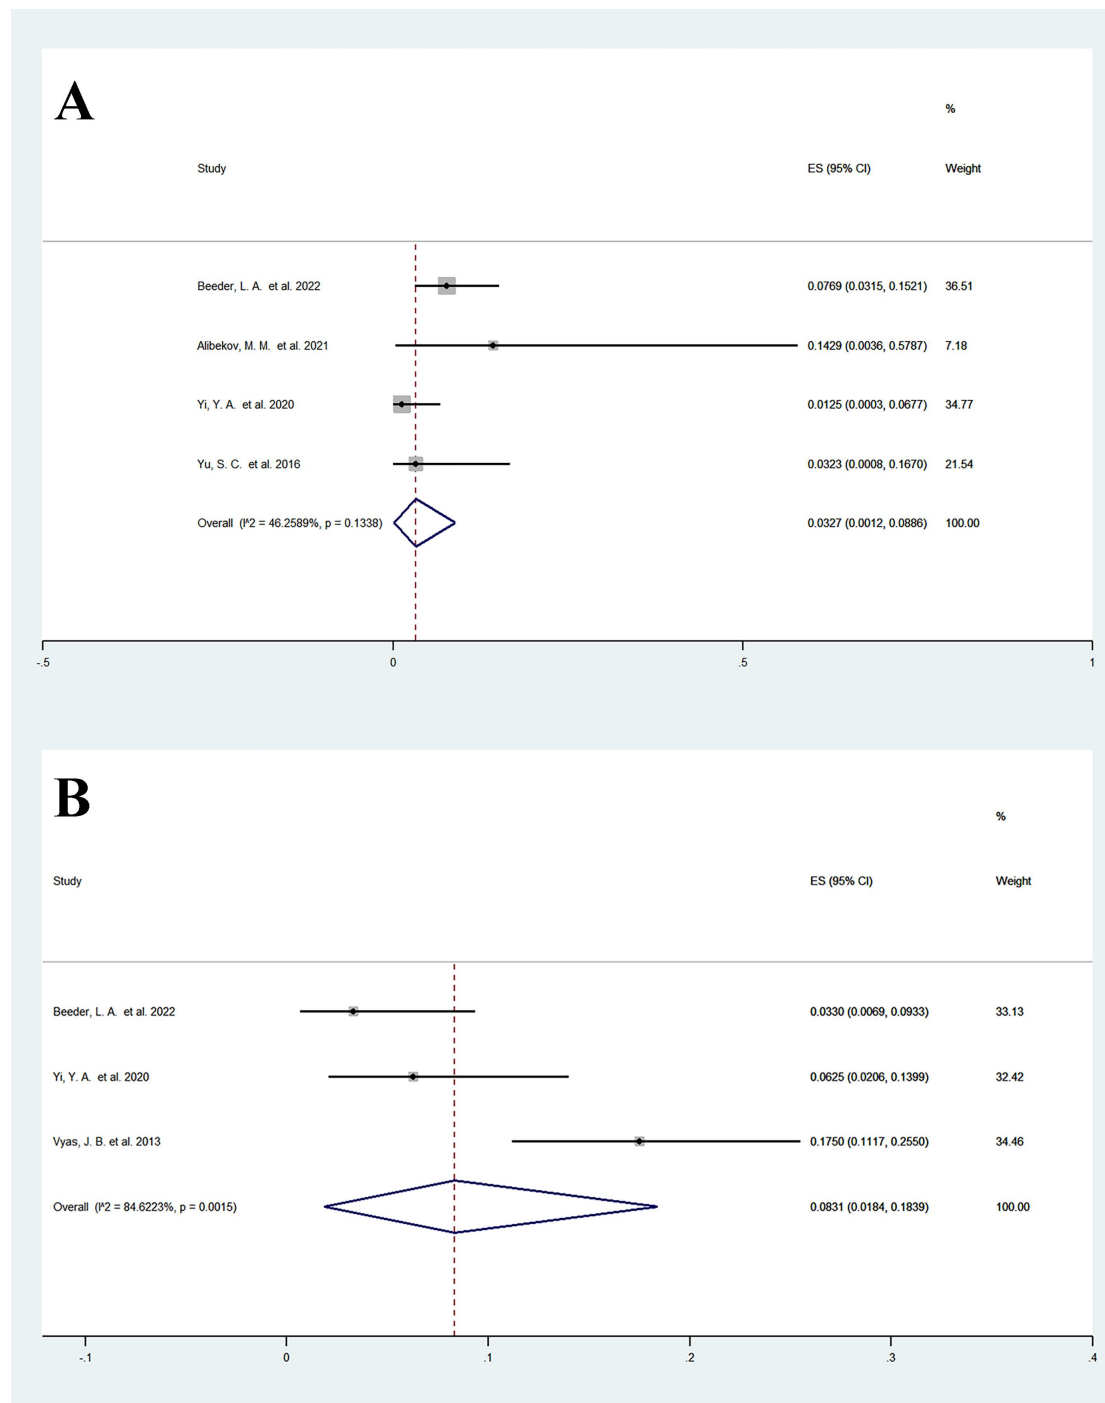

Supplementary Figure 3: The sensitivity analysis of conventional balloon dilation success rate.

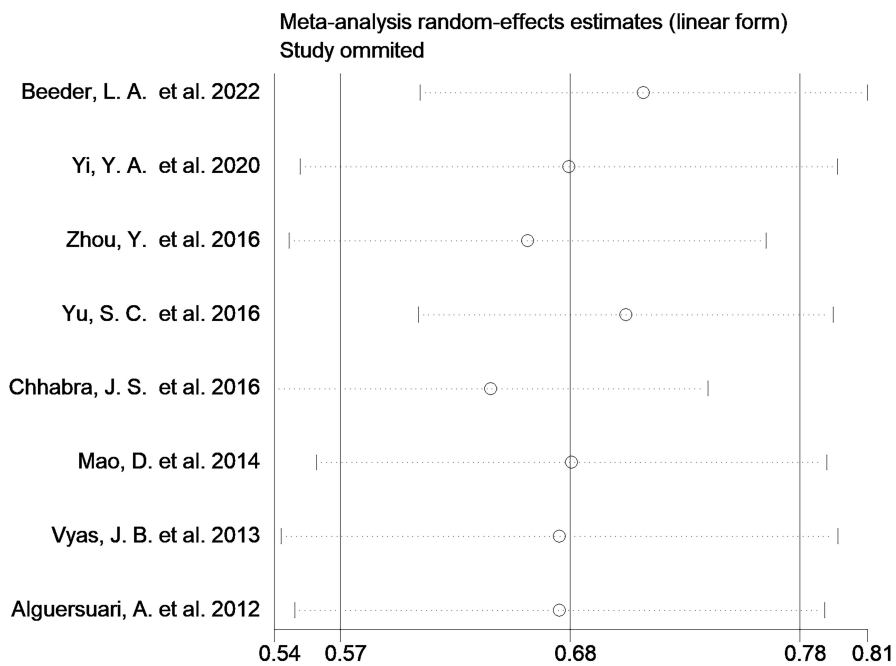

review only



**Supplementary Figure 4: Forest plots showing the subgroup analysis of conventional balloon dilation success rate according to the percentage of anterior urethral strictures.**

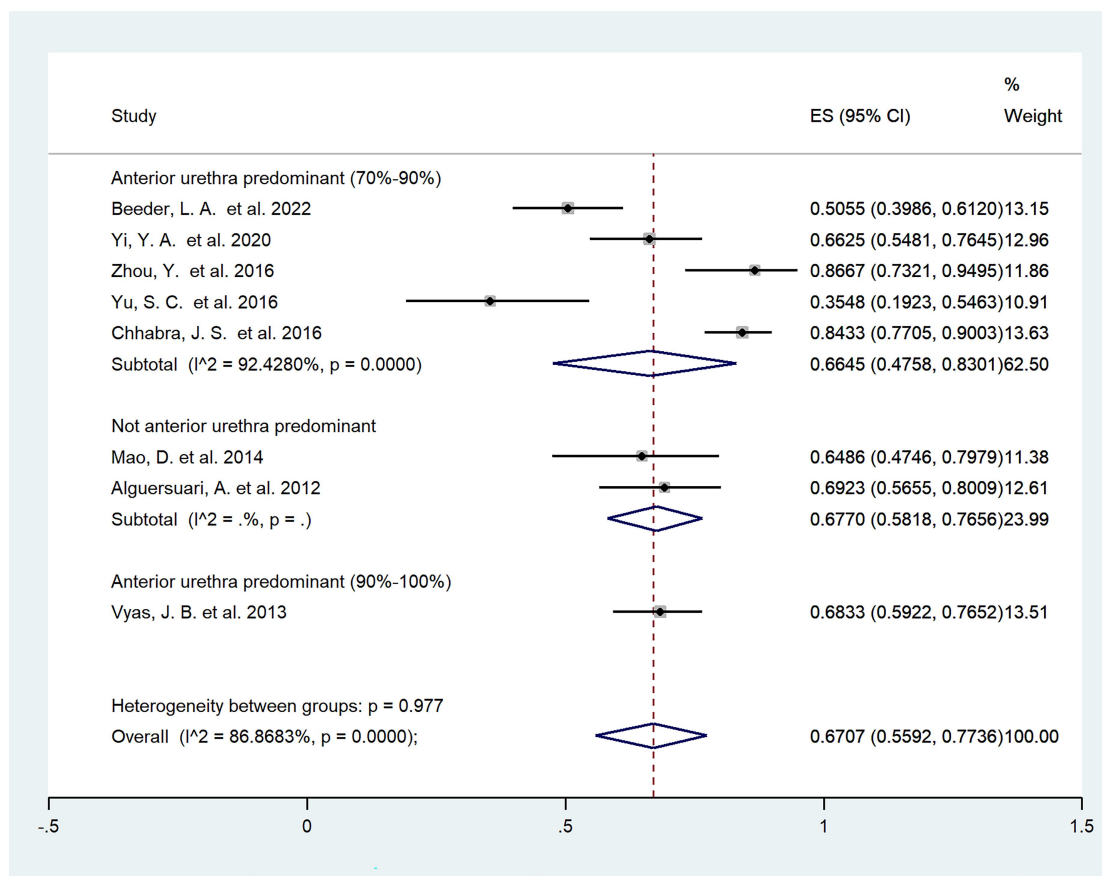

**Supplementary Figure 5: Forest plots showing other possible influencing factors of balloon dilation. (A) with and without previous urethroplasty; (B) History of smoking; (C) Coronary heart disease; (D) Diabetes mellitus; (E) Hypertension; (F) Chronic obstructive pulmonary disease. CI, confidence interval.**

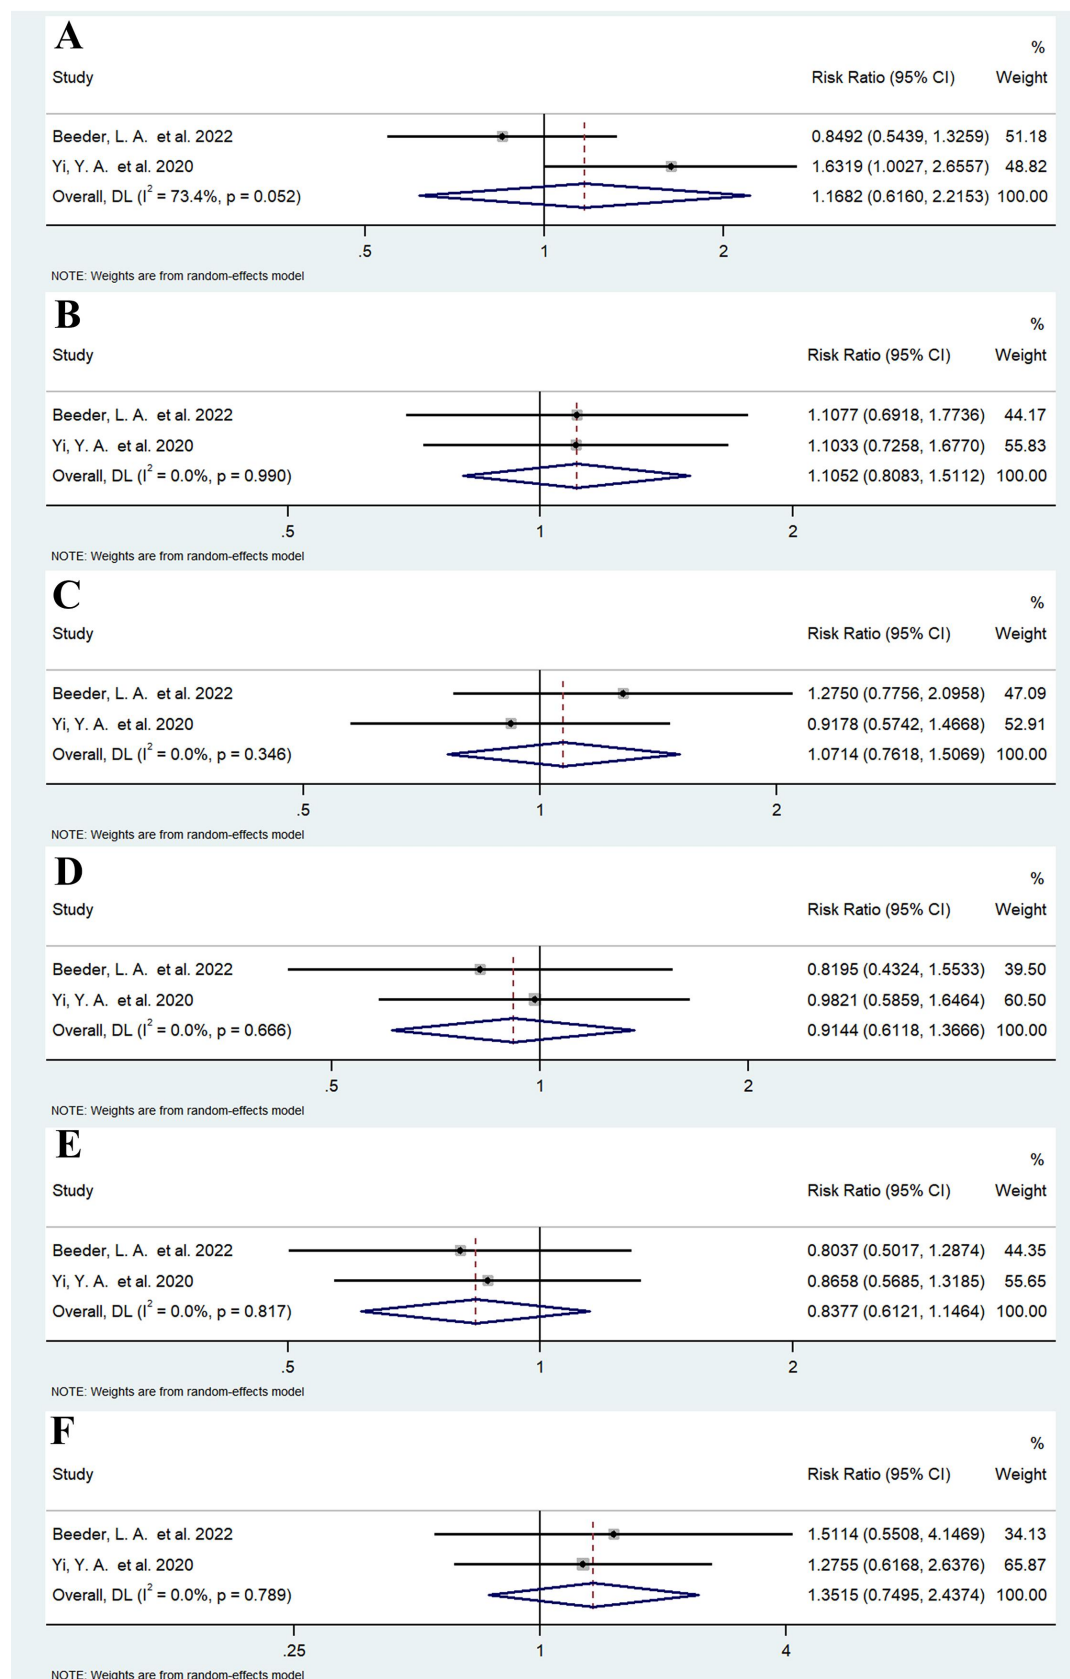

# BMJ Open

## Balloon dilation for the treatment of male urethral strictures: A Systematic Review and Meta-analysis

|                                 |                                                                                                                                                                                                                                                                                                                                                                                                                                                                                                                                                                                                                                                                                                                                                                                                          |
|---------------------------------|----------------------------------------------------------------------------------------------------------------------------------------------------------------------------------------------------------------------------------------------------------------------------------------------------------------------------------------------------------------------------------------------------------------------------------------------------------------------------------------------------------------------------------------------------------------------------------------------------------------------------------------------------------------------------------------------------------------------------------------------------------------------------------------------------------|
| Journal:                        | <i>BMJ Open</i>                                                                                                                                                                                                                                                                                                                                                                                                                                                                                                                                                                                                                                                                                                                                                                                          |
| Manuscript ID                   | bmjopen-2023-071923.R2                                                                                                                                                                                                                                                                                                                                                                                                                                                                                                                                                                                                                                                                                                                                                                                   |
| Article Type:                   | Original research                                                                                                                                                                                                                                                                                                                                                                                                                                                                                                                                                                                                                                                                                                                                                                                        |
| Date Submitted by the Author:   | 22-Dec-2023                                                                                                                                                                                                                                                                                                                                                                                                                                                                                                                                                                                                                                                                                                                                                                                              |
| Complete List of Authors:       | Li, Xiaoyu; Peking University First Hospital Department of Urology; Peking University Institute of Urology<br>Xu, Chunru; Peking University First Hospital, Department of Urology; Peking University, Institute of Urology<br>Ji, Xing; Peking University First Hospital Department of Urology; Peking University Institute of Urology<br>Zhu, Zhenpeng; Peking University First Hospital, Department of Urology; Peking University, Institute of Urology<br>Cai, Tianyu; Peking University First Hospital, Department of Urology; Peking University, Institute of Urology<br>Guo, Zhenke; Peking University First Hospital Department of Urology; Peking University Institute of Urology<br>Lin, Jian; Peking University First Hospital, Department of Urology; Peking University, Institute of Urology |
| <b>Primary Subject Heading</b>: | Urology                                                                                                                                                                                                                                                                                                                                                                                                                                                                                                                                                                                                                                                                                                                                                                                                  |
| Secondary Subject Heading:      | Urology                                                                                                                                                                                                                                                                                                                                                                                                                                                                                                                                                                                                                                                                                                                                                                                                  |
| Keywords:                       | UROLOGY, Adult urology < UROLOGY, Kidney & urinary tract disorders < UROLOGY                                                                                                                                                                                                                                                                                                                                                                                                                                                                                                                                                                                                                                                                                                                             |
|                                 |                                                                                                                                                                                                                                                                                                                                                                                                                                                                                                                                                                                                                                                                                                                                                                                                          |

SCHOLARONE™  
Manuscripts

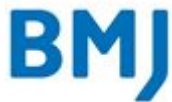

I, the Submitting Author has the right to grant and does grant on behalf of all authors of the Work (as defined in the below author licence), an exclusive licence and/or a non-exclusive licence for contributions from authors who are: i) UK Crown employees; ii) where BMJ has agreed a CC-BY licence shall apply, and/or iii) in accordance with the terms applicable for US Federal Government officers or employees acting as part of their official duties; on a worldwide, perpetual, irrevocable, royalty-free basis to BMJ Publishing Group Ltd ("BMJ") its licensees and where the relevant Journal is co-owned by BMJ to the co-owners of the Journal, to publish the Work in this journal and any other BMJ products and to exploit all rights, as set out in our [licence](#).

The Submitting Author accepts and understands that any supply made under these terms is made by BMJ to the Submitting Author unless you are acting as an employee on behalf of your employer or a postgraduate student of an affiliated institution which is paying any applicable article publishing charge ("APC") for Open Access articles. Where the Submitting Author wishes to make the Work available on an Open Access basis (and intends to pay the relevant APC), the terms of reuse of such Open Access shall be governed by a Creative Commons licence – details of these licences and which [Creative Commons](#) licence will apply to this Work are set out in our licence referred to above.

Other than as permitted in any relevant BMJ Author's Self Archiving Policies, I confirm this Work has not been accepted for publication elsewhere, is not being considered for publication elsewhere and does not duplicate material already published. I confirm all authors consent to publication of this Work and authorise the granting of this licence.

1  
2  
3  
4 **Balloon dilation for the treatment of male urethral strictures: A**  
5  
6 **Systematic Review and Meta-analysis**  
7  
8  
9  
10  
11  
12  
13  
14  
15

16 **Xiaoyu Li<sup>1,2,3</sup>, Chunru Xu<sup>1,2,3</sup>, Xing Ji<sup>1,2,3</sup>, Zhenpeng Zhu<sup>1,2,3</sup>, Tianyu Cai<sup>1,2,3</sup>,**  
17 **Zhenke Guo<sup>1,2,3</sup>, Jian Lin<sup>1,2,3\*</sup>**

19 1. Department of Urology, Peking University First Hospital, Beijing 100034, China;

20 2. Institute of Urology, Peking University, Beijing 100034, China;

21 3. National Urological Cancer Center, Beijing, 100034, China

22  
23 \*. Correspondence: **Jian Lin, M.D.** (linjianbj@163.com); Department of Urology,  
24 Peking University First Hospital; Institute of Urology, Peking University, National  
25 Urological Cancer Center, Beijing. No. 8, Street Xishiku, District Xicheng, Beijing,  
26 China, 100034.  
27  
28  
29  
30  
31  
32  
33  
34  
35  
36  
37  
38  
39  
40  
41  
42  
43  
44  
45  
46  
47  
48  
49  
50  
51  
52  
53  
54  
55  
56  
57  
58  
59  
60

## Abstract

**Objective:** The use of minimally invasive endoluminal treatment for urethral strictures has been a subject for debate for several decades. The aim of this study was to review and discuss the safety, efficacy and factors influencing the clinical application of balloon dilation for the treatment of male urethral strictures.

**Design:** Systematic review and meta-analysis.

**PROSPERO registration number:** CRD42022334403.

**Data sources:** Embase, Medline, Web of Science, Cochrane Library and Scopus were searched for publications published before July 17, 2022.

**Study selection:** Two independent researchers screened and assessed the results, and all clinical studies on balloon dilation for the treatment of urethral strictures in men were included.

**Data extraction and synthesis:** The success rate, rate of adverse events, International Prostate Symptom Scores (IPSS), maximum uroflow (Qmax) and postvoid residual urine volume (PVR) were the main outcomes. Stata 14.0 was used for statistical analysis.

**Results:** Fifteen studies with 715 patients were ultimately included in this systematic review. The pooled results of eight studies showed that the reported success rate of simple balloon dilation for male urethral strictures was 67.07% (95% CI: 55.92%-77.36%). The maximum urinary flow rate at 3 months (RR=2.6510, 95% CI: 1.0681-4.2338,  $p < 0.01$ ) and the maximum urinary flow rate at one year (RR=1.6637, 95% CI: 1.1837-2.1437,  $p < 0.05$ ) were significantly different after dilation. There is insufficient evidence to suggest that balloon dilation is superior to optical internal urethrotomy (OIU) or direct visual internal urethrotomy (DVIU) (RR=1.4754, 95% CI: 0.7306-2.9793,  $p=0.278$ ).

**Conclusion:** Balloon dilation may be an intermediate step before urethroplasty and is a promising alternative therapy to simple dilation and DVIU. The balloon is a promising drug delivery tool, and paclitaxel drug-coated balloon dilation is effective in reducing retreatment rates in patients with recurrent anterior urethral strictures. The etiology, location, length, previous treatment of urethral stricture may be associated with the efficacy of balloon dilation.

**Key words:** Balloon dilation, urethral stricture, systematic review, meta-analysis

### Strengths and limitations of this study

- This study systematically reviewed the principle, safety, and efficacy of balloon dilatation and described intermittent urethral balloon self-dilation.
- We provide a comprehensive analysis of factors such as etiology, stricture location, stricture length, and prior management intervention and discuss the clinical directions for balloon dilation.
- The quality of the included studies was relatively low, and there was a considerable risk of bias.
- Most of the included studies were retrospective observational studies that lacked valid controls, and the results need to be interpreted with caution.

## 1. Introduction

Urethral stricture is relatively common disease in men and is described as any abnormal narrowing of the anterior or posterior urethra. In some susceptible populations, the incidence of male urethral stricture disease is as high as 0.6%, with more than 5,000 individuals hospitalized per year [1]. The most common symptoms in patients are weakened urine flow and even urinary retention, which seriously affects the quality of life [2]. The etiology of urethral stricture is complex, is complex and includes trauma, infection, iatrogenic, lichen sclerosus, idiopathic, etc. Iatrogenic urethral injury is the most common type of urethral stricture in resource-rich countries, whereas urethral injuries caused by infection and trauma are more common in developing countries [3, 4]. With continuous developments in medical technology, the rapid increase in the incidence of iatrogenic urethral stricture warrants further investigation. Catheterization, transurethral manipulation, prostate surgery, radiotherapy, and chemotherapy can cause irreversible stricture of the urethra [5-8].

Although urethroplasty has been recognized as a curative treatment for urethral strictures, dilation and direct visual internal urethrotomy (DVIU) are still widely used and effective for single bulbar urethral strictures < 2 cm, for which the success rate is 35-70% [3, 9]. There is currently a lack of evidence evaluating whether dilation or DVIU is more effective than the other methods, so both have the same therapeutic indications [10].

Balloon dilation is a special type of dilation that has a long history of treating urethral strictures in men. Russinovich, N. A. E. et al. were first to report the outcomes of balloon dilation performed in 7 males with urethral stricture in 1980; this type of dilation was painless compared to traditional dilation methods and was not prone to cause mucosal or periurethral injury [11]. Subsequently, Pinot, J. J. dilated the urethra of 25 patients using an inflatable balloon catheter, which included atraumatic catheterization through a vascular catheter under urethroscopy, followed by inflation of the balloon catheter into a flexible guidewire [12]. Dilation was controlled under the guidance of voiding urethrography and was much less uncomfortable than conventional urethral dilation; only 3 of 25 patients needed to undergo a repeat procedure. Immediately, Glesy, J. D. designed a new coaxial balloon dilator for the treatment of urethral stricture and noted that the balloon dilator can expand slowly and gradually, which is better than traditional rapid and sudden expansion [13]. Several studies have shown that balloon dilation results in minimal trauma and immediate symptom relief, with less patient discomfort and a lower complication rate [14-19]. Since there is some radiation exposure with angiography, B-ultrasound has been used to facilitate control of balloon dilation, and good clinical results have been initially achieved [20]. Further research revealed that balloon dilation under the guidance of cystoscopy gently, safely and effectively dilates the urethra [21].

Although balloon dilation is a well-tolerated minimally invasive endoluminal surgical procedure widely used in practice, its clinical significance has not been systematically and comprehensively reviewed. Our objective was to assess the efficacy, safety and factors influencing the clinical application of balloon dilation.



## 2. Materials and methods

### 2.1 Search strategy

Reporting in this study was in accordance with the guidelines of the PRISMA statement [22] (Supplementary Table 1), and the specific protocol was registered on PROSPERO with the registration number CRD42022334403. Using Medical Subject Headings and free text terms, we searched for relevant articles published prior to July 17, 2022, in the following databases: Medline, Embase, Cochrane Library, Web of Science and Scopus. The search strategy is shown in the Supplementary File.

### 2.2 Eligibility criteria

Two researchers (X.L. and C.X.) screened and assessed the search results independently. The inclusion criteria were as follows: (1) studies with male patients diagnosed with urethral strictures; (2) studies in which balloon dilation was applied as the main intervention, not including patient self-dilation; (3) clinical studies, retrospective or prospective; (4) studies reporting the success and adverse event rates. Conference abstracts were eligible for inclusion if they reported sufficient outcome data. If several articles were all related to the same study, the most recent publication with the most complete data was included in the systematic review. A consensus was finally reached through consultation and discussion in the event of any disagreements or differences between the two researchers.

### 2.3 Quality assessment

The quality of the included studies was independently assessed by two researchers (X.L. and C.X.). All observational studies were assessed using the Newcastle–Ottawa Scale (NOS) in terms of population selection, comparability, and outcome evaluation [23]. Randomized controlled trials (RCTs) were assessed using the Jadad Quality Scale, and articles with a score  $>3$  were considered high-quality research [24]. For single-arm clinical trials, the first 8 items of the Methodological Index for Non-randomized Studies (MINORS) scale were used for assessment [25]. The ROBINS-I tool was used to further assess the risk of bias in non-randomized controlled trials [26].

### 2.4 Data extraction

We extracted data on the success rate, adverse event rate, International Prostate Symptom Score (IPSS), maximum uroflow ( $Q_{max}$ , mL/sec) and postvoid residual urine volume (PVR). When disagreements arose, a third reviewer participated in the discussions and mediated to reach a consensus.

### 2.5 Statistical analysis

Stata 14.0 (StataCorp, USA) was used for statistical analysis, and the success and adverse event rates were reported as proportions. The  $I^2$  index was used to test for between-study heterogeneity. An  $I^2 > 50\%$  was considered to indicate significant



1  
2  
3 heterogeneity, and the random effects model was used for pooled analysis; otherwise,  
4 less heterogeneity was considered, and the fixed effects model was used. By  
5 excluding each study one by one, we performed a sensitivity analysis of the balloon  
6 dilation success rate to assess the stability and reliability of the pooled results.  
7 Subgroup analyses were performed according to the results of the meta-regression  
8 models.  
9  
10

## 11 12 **2.6 Patient and public involvement**

13 None.  
14  
15

## 16 17 **3. Results**

### 18 19 **3.1 Study selection**

20 The flowchart of the study retrieval process is shown in Figure 1. Fifteen studies were  
21 included in the systematic review, involving a total of 842 patients. Table 1 and Table  
22 2 present the main characteristics of the included studies. Among these, there were 1  
23 randomized controlled trial (RCT) [27], 2 single-arm clinical trials [28, 29], 2  
24 case-control studies [30, 31], and 10 retrospective case studies [32-41].  
25  
26  
27

### 28 29 **3.2 Quality analysis and risk of bias**

30 We evaluated the quality of the 15 studies included in the systematic review, and the  
31 results are presented in Supplementary Table 2. Most of the current studies in this  
32 article are retrospective, with inadequate study designs and a lack of valid controls.

33 We further conducted a bias analysis of 14 non-randomized controlled trials using the  
34 ROBINS-I tool, and the evaluation criteria and results are shown in Supplementary  
35 Table 3. Since the operation is often influenced by the subjective preferences of the  
36 surgeons and most of the included studies are retrospective case studies, unavoidable  
37 selection bias is one of the most prominent issues. Selection bias is exacerbated in  
38 some small-sample studies of patients with specific comorbid conditions, such as  
39 coexisting urinary calculi. Some confounding factors such as age, body mass index,  
40 etiology of the stricture, location of the stricture, length of the stricture, prior  
41 management, and other factors, such as patient baseline physical condition, were  
42 present in most studies. Some of these confounding factors were not appropriately  
43 controlled for in the multivariable adjusted analysis. Some outcome measures of  
44 balloon dilation are subjective, and researchers may also exaggerate the efficacy of  
45 the procedure to publicize its advantages. Moreover, a funnel plot of eight studies  
46 included in the evaluation of the conventional balloon dilation success rate was  
47 generated, and there was no evidence of publication bias (Egger test:  $t=-2.42$ ,  
48  $p=0.052>0.05$ ) (Supplementary Figure 1). In addition, due to the small sample sizes  
49 of some of the included studies, there are some limitations in reflecting the overall  
50 clinical situation.  
51  
52  
53  
54  
55  
56  
57

### 58 59 **3.3 The principle of balloon dilation**

60 The principle of balloon dilation is to apply radial force along the balloon span at the

1  
2  
3 stricture site. While the principle of traditional optical internal urethrotomy is to  
4 achieve epithelial regeneration by incising scar tissue. Compared with the parallel  
5 force applied by simple dilation, balloon dilation applies less shear force and causes  
6 less trauma, which can reduce the risk of cavernous fibrosis development and cause  
7 less discomfort [31, 42, 43]. Balloon dilation can also cause the fibrous scar in the  
8 stricture to more evenly fracture, resulting in 360° annular expansion, thereby  
9 increasing the inner diameter of the stenotic segment; during the balloon dilation  
10 process, the urethral pressure gradually increases, and the balloon is slowly and gently  
11 expanded to minimize damage to blood vessels and urethral tissue [13]. Balloon  
12 dilation tends to achieve extrusion molding in a single pass, and the high pressure of  
13 the balloon is effective in compressing the bleeding point. In addition, the smooth  
14 surface of balloon can prevent normal urethral mucosal damage.  
15  
16  
17  
18  
19

### 20 **3.4 Safety assessment and incidence of adverse events**

21 Urinary tract infection, urinary retention, postoperative haematuria and dysuria are the  
22 main complications of balloon dilation. Therefore, strict aseptic and standardized  
23 operations are needed during surgery to prevent and avoid the occurrence of adverse  
24 events as much as possible.  
25

26 We performed a pooled analysis of reported adverse event rates for urinary tract  
27 infection and urinary retention. The pooled incidence of infection in patients after  
28 balloon dilation was 3.27% (95% CI: 1.2%-8.86%; heterogeneity:  $I^2=46.2589\%$ ,  $p=$   
29  $0.1338$ ) (Supplementary Figure 2A). However, the pooled incidence of urinary  
30 retention was 8.31% (95% CI: 1.84%-18.39%; heterogeneity:  $I^2=84.6223\%$ ,  $p<0.05$ )  
31 (Supplementary Figure 2B). Urinary tract infection is the most common complication  
32 within 30 days of balloon dilation, and some patients require antibiotic treatment [32].  
33 Some patients also have transient haematuria after surgery, but no further treatment,  
34 such as blood transfusion, is needed [31, 32]. Furthermore, Yu, S. C. 's study also  
35 revealed that the incidence of major postoperative complications, such as urethral  
36 bleeding and urinary tract infection, in the balloon dilation group was lower than that  
37 in the DVIU group (urethral bleeding: 2/31 vs. 8/25,  $P=0.017$ ; UTI: 1/31 vs. 6/25  
38  $P=0.037$ ) [31].  
39  
40  
41  
42  
43  
44

### 45 **3.5 Clinical efficacy of balloon dilation for male urethral strictures**

#### 46 **3.5.1 Conventional balloon dilation success rate**

47 For studies with conventional balloon dilation, we defined success of balloon dilation  
48 as no recurrence or no further stricture treatment during the follow-up period,  
49 excluding studies with a sample size of less than 30 on account of the potentially  
50 greater selection bias and merging data from 8 studies published in 2012-2022 [31,  
51 32, 34-36, 38-40]. Reported success rates varied from 35.5% to 86.7%. The pooled  
52 balloon dilation success rate was 67.07% (95% CI: 55.92%-77.36%; heterogeneity:  
53  $I^2=86.8683\%$ ,  $p<0.05$ ) (Figure 2A). Six of these studies reported follow-up, with a  
54 median pooled follow-up time of 13.50 months (95% CI: 12.86-14.14%;  
55 heterogeneity:  $I^2=99.2\%$ ,  $P<0.05$ ). This result needs to be interpreted with caution and  
56 most likely overestimates the efficacy of balloon dilation. Clinical data obtained  
57  
58  
59  
60

1  
2  
3 during long-term follow-up are lacking, and the real-world balloon dilation success  
4 rate should decline progressively with longer follow-up. Moreover, the assessment of  
5 the success rate of balloon dilation involves significant subjective factors that may  
6 exaggerate efficacy.  
7

8 We performed a sensitivity analysis by excluding studies one by one. The recalculated  
9 results are shown in Supplementary Table 4 and Supplementary Figure 3. Compared  
10 to the pooled results of all the studies, the maximum deviation rate was 5.3%,  
11 indicating that the final pooled result was relatively stable. We performed a  
12 meta-regression analysis and found that factors such as the location of the stricture  
13 ( $t=5.25$ ,  $p<0.05$ ), length of the stricture ( $t=7.97$ ,  $p<0.05$ ), and age ( $t=7.97$ ,  $p<0.05$ )  
14 may be associated with high heterogeneity, and subgroup analyses of these factors  
15 were performed as described in Section 3.6.  
16  
17  
18  
19

### 20 **3.5.2 Drug coated balloon dilation success rate**

21 Balloons coated with drugs such as paclitaxel have achieved promising clinical results  
22 in recent years. Two studies on paclitaxel-coated balloons for recurrent urethral  
23 strictures revealed the considerable effect of these devices on recurrent urethral  
24 strictures, with a relatively objective functional success rate (67%) and an anatomical  
25 success rate (74.6%) [27, 28]. The functional success rate was defined as the  
26 percentage of subjects with  $\geq 50\%$  improvement in IPSS scores who did not require  
27 retreatment. The anatomical success rate was defined as the proportion of participants  
28 for whom a 16Fr flexible cystoscope or a 14Fr catheter could atraumatically pass  
29 through the treated area at 6 months postoperatively. Both drug balloon studies were  
30 performed in patients with recurrent anterior urethral strictures who had received at  
31 least 1 prior endoscopic treatment. The patients had urethral strictures  $\leq 12F$ , all less  
32 than 3 cm in length. The IPSS scores were greater than 11, and all the patients had  
33 urinary flow rates of at least 15 ml/s or less. These studies excluded patients with  
34 prior urethroplasty, lichen sclerosus, neurogenic bladder, bladder neck contracture,  
35 artificial urinary sphincter, or other confounding etiologies.  
36  
37  
38  
39  
40  
41

### 42 **3.5.3 Assessment of patient's clinical symptoms**

43 The changes in the urinary flow rate, PVR, and IPSS are summarized in Table 3.  
44 Compared with that preoperatively, the postoperative maximum urinary flow rate was  
45 greatly improved at 3 months (RR=2.6510, 95% CI: 1.0681-4.2338;  $z=3.282$ ,  $p <$   
46  $0.01$ ;  $I^2=96.5\%$ ,  $p < 0.05$ ), and the significant difference remained at one year  
47 postoperatively (RR=1.6637, 95% CI: 1.1837-2.1437;  $z=6.794$ ,  $p < 0.01$ ;  $I^2=78.8\%$ ,  $p$   
48  $< 0.05$ ). The patient's IPSS scores and PVR also decreased accordingly.  
49

50 Patients' subjective perception of improvement in voiding symptoms is a crucial  
51 indicator of the true efficacy of urethral stricture treatment, and the results are  
52 summarized in Table 4. The ROBUST III study [28] revealed that patients'  
53 International Prostate Symptom Score-Quality of Life (IPSS QoL) scores increased  
54 significantly by 30 days after balloon dilation, indicating outstanding short-term  
55 efficacy. Moreover, three-year follow-up results from the ROBUST I trial study [27]  
56 indicated significant improvements in both QoL scores and Patient-Reported  
57  
58  
59  
60

Outcome Measure for Urethral Stricture Surgery (USS-PROM) scores for patients who underwent balloon dilation compared to baseline status ( $p < 0.0001$ ). With the extension of follow-up time, the quality of life of the patients remained good, reflecting the long-term effectiveness of balloon dilation.

**Table 1: Clinical characteristics and efficiency of balloon dilation (I).**

| Study                  | Evaluable Patients (n) | Age (average)                | Etiology                                                                                                                                              | Location of the Strictures                                           | Length of Stricture                       | Predilated state                                                                                                                                       |
|------------------------|------------------------|------------------------------|-------------------------------------------------------------------------------------------------------------------------------------------------------|----------------------------------------------------------------------|-------------------------------------------|--------------------------------------------------------------------------------------------------------------------------------------------------------|
| Virasoro, Ramon et al. | 43                     | 50.7<br>(22.0-81.0)          | /                                                                                                                                                     | Anterior urethra                                                     | ≤ 2 cm                                    | 1-4 prior endoscopic treatments (none within 3 months of enrolment)                                                                                    |
| Elliott, S. P. et al.  | 60 (79): 15 (48)*      | 60.6 ± 16.0 :<br>58.7 ± 15.5 | Iatrogenic (21/78, 26.9%);<br>Idiopathic (42/78, 53.8%);<br>Inflammatory (1/78, 1.3%);<br>Traumatic (14/78, 17.9%);<br>pelvic radiation (9/79, 11.4%) | Anterior urethra                                                     | ≤ 3 cm                                    | ≥ 2 prior endoscopic treatments                                                                                                                        |
| Beeder, L. A. et al.   | 91                     | 61                           | /                                                                                                                                                     | Anterior urethra<br>(n=75, 82%);<br>posterior urethra<br>(n=16, 18%) | /                                         | Most (75/91, 82%) had prior treatment for USD (endoscopic 50/91 (55%), 51/91 (56%) urethroplasty)                                                      |
| Alibekov, M. M. et al. | 7                      | 52<br>(47-65)                | Idiopathic (4/7, 57.1%);<br>Inflammatory (1/7, 14.3%);<br>Traumatic (2/7, 28.6%)                                                                      | Anterior urethra                                                     | ≤ 1 cm                                    | All patients had 1 urethral stone. The sizes of the stone ranged from 4 to 9 mm (median - 6 mm)                                                        |
| Yi, Y. A. et al.       | 80                     | /                            | /                                                                                                                                                     | Anterior urethra<br>(n=59, 74%);<br>posterior urethra<br>(n=21, 26%) | ≤ 1.5 cm                                  | Over 75% of patients had some form of prior stricture treatment, including dilation (34/80, 42.5%), DVIU (19/80, 23.8%), or urethroplasty (48/80, 60%) |
| Kumano, Y. et al.      | 13 : 9                 | 71 : 63                      | Iatrogenic (10/13, 76.9%);<br>Idiopathic (3/13, 23.1%)                                                                                                | Anterior urethra<br>(n=9, 41%);<br>posterior urethra<br>(n=13, 59%)  | /                                         | /                                                                                                                                                      |
| Zhou, Y. et al.        | 45                     | 46.6<br>(22-76)              | Iatrogenic (19/45, 42.2%);<br>Inflammatory (5/45, 11.1%);<br>Traumatic (18/45, 40%);<br>pelvic radiation (3/45, 6.7%)                                 | Anterior urethra<br>(n=36, 80%);<br>posterior urethra<br>(n=9, 20%)  | ≤ 2 cm                                    | 5 patients had a prior suprapubic cystostomy                                                                                                           |
| Yu, S. C. et al.       | 31 : 25                | 49 (32-67) :<br>44 (24-71)   | Iatrogenic (7/31, 22.6%);<br>Idiopathic (1/31, 3.2%);<br>Inflammatory (2/31, 6.5%);<br>Traumatic (21/31, 67.7%);                                      | Anterior urethra<br>(n=45, 80%);<br>posterior urethra<br>(n=11, 20%) | ≤ 1 cm (n=48, 86%) ;<br>> 1 cm (n=8, 14%) | None received prior endovascular therapy                                                                                                               |

|                          |            |               |                                                                                                           |                                                                              |                                           |                                                                                  |
|--------------------------|------------|---------------|-----------------------------------------------------------------------------------------------------------|------------------------------------------------------------------------------|-------------------------------------------|----------------------------------------------------------------------------------|
| Chhabra, J. S. et al.    | 134 (144)* | 52 (18-85)    | Iatrogenic (59/144, 41.0%); Idiopathic (84/144, 58.3%); pelvic radiation (1/144, 0.7%)                    | Anterior urethra (n=110, 76%); posterior urethra (n=8, 6%); both (n=26, 18%) | ≤ 1.5 cm (n=130, 90%); > 1 cm (n=14, 10%) | /                                                                                |
| Ishii, Gen et al.        | 10         | 70 (61-75)    | Iatrogenic                                                                                                | Posterior urethra                                                            | /                                         | All patients had cystourethral anastomotic stricture after radical prostatectomy |
| Mao, D. et al.           | 37 (39)*   | 55 (24-84)    | /                                                                                                         | Anterior urethra (n=17, 44%); posterior urethra (n=20, 51%); both (n=2, 5%)  | ≤ 2 cm                                    | /                                                                                |
| Vyas, J. B. et al.       | 120        | 49.86 (30-85) | /                                                                                                         | Anterior urethra (n=114, 95%); posterior urethra (n=6, 5%)                   | ≤ 1.5 cm                                  | /                                                                                |
| Alguersuari, A. et al.   | 65         | 63.17 ± 16.9  | /                                                                                                         | Anterior urethra (26.2%); posterior urethra (73.8%)                          | ≤ 2 cm (86.2%); > 2 cm (13.8%)            | /                                                                                |
| MacDiarmid, S. A. et al. | 51         | /             | Iatrogenic (27/51, 52.9%); Idiopathic (11/51, 21.6%); Inflammatory (10/51, 19.6%); Traumatic (3/51, 5.9%) | Anterior urethra (n=49, 96%); posterior urethra (n=2, 4%)                    | /                                         | /                                                                                |
| Mohammed, S. H. et al.   | 6 (7)*     | 35 (16-67)    | Iatrogenic (1/6, 16.7%); Idiopathic (2/6, 33.3%); Inflammatory (2/6, 33.3%); Traumatic (1/6, 16.7%)       | Anterior urethra (n=4, 57%); posterior urethra (n=3, 43%)                    | /                                         | /                                                                                |

\* the number of people who were initially assessed at baseline in the study is in parentheses, and the number of people who could be effectively assessed at the end of the follow-up is outside the brackets.

**Table 2: Clinical characteristics and efficiency of balloon dilation ( II ).**

| Study                  | Balloon Types                       | Control       | Definition of Success Rate                                                                                                                                                                     | Reported Success Rate (%) | Follow-up |
|------------------------|-------------------------------------|---------------|------------------------------------------------------------------------------------------------------------------------------------------------------------------------------------------------|---------------------------|-----------|
| Virasoro, Ramon et al. | Optilume® drug coated balloon (DCB) | /             | Functional success was defined as ≥50% reduction in International Prostate Symptom Score (IPSS) without need for retreatment.                                                                  | 67                        | 3 years   |
| Elliott, S. P. et al.  | Optilume® drug coated balloon (DCB) | dilation/DVIU | Anatomical success: the proportion of participants in whom the surgeons could atraumatically pass a 16-French flexible cystoscope or a 14-French catheter through the treated area at 6 months | 74.6 : 26.8               | 1 year    |

|                                                                                                                                                                                                                                                                                                                                                             |                          |                                                                                     |      |                                                                                                                               |         |                          |
|-------------------------------------------------------------------------------------------------------------------------------------------------------------------------------------------------------------------------------------------------------------------------------------------------------------------------------------------------------------|--------------------------|-------------------------------------------------------------------------------------|------|-------------------------------------------------------------------------------------------------------------------------------|---------|--------------------------|
| 1<br>2<br>3<br>4<br>5<br>6<br>7<br>8<br>9<br>10<br>11<br>12<br>13<br>14<br>15<br>16<br>17<br>18<br>19<br>20<br>21<br>22<br>23<br>24<br>25<br>26<br>27<br>28<br>29<br>30<br>31<br>32<br>33<br>34<br>35<br>36<br>37<br>38<br>39<br>40<br>41<br>42<br>43<br>44<br>45<br>46<br>47<br>48<br>49<br>50<br>51<br>52<br>53<br>54<br>55<br>56<br>57<br>58<br>59<br>60 | Beeder, L. A. et al.     | 8-cm, 24-French UroMax Ultra™ balloon dilator                                       | /    | Proportion of patients who reported no recurrence of lower urinary tract symptoms or did not need further stricture treatment | 50      | 12 months (3-40)         |
|                                                                                                                                                                                                                                                                                                                                                             | Alibekov, M. M. et al.   | /                                                                                   | /    | Proportion of patients without recurrence of urethral stricture 18 months of dilation                                         | 85.7    | 14 months (3-24)         |
|                                                                                                                                                                                                                                                                                                                                                             | Yi, Y. A. et al.         | 8-cm, 24-French UroMax Ultra™ balloon dilator                                       | /    | Proportion of patients with no postoperative recurrence of urethral stricture or who did not need further stricture treatment | 66.3    | 8.4 months (IQR, 3.9-22) |
|                                                                                                                                                                                                                                                                                                                                                             | Kumano, Y. et al.        | Balloon dilation catheter (X-FORCE; BARD Medical, Murray Hill, NJ, USA)             | OIU  | Proportion of patients with no recurrence of stricture during the follow-up period                                            | 84 : 22 | /                        |
|                                                                                                                                                                                                                                                                                                                                                             | Zhou, Y. et al.          | Balloon catheter (X-Force™, C.R. Bard Inc., USA)                                    | /    | Proportion of patients who did not need further stricture treatment during the follow-up period                               | 86.7    | 6-24 months              |
|                                                                                                                                                                                                                                                                                                                                                             | Yu, S. C. et al.         | 6-cm, 7-French balloon catheter (X-Force™, C.R. Bard Inc., USA)                     | DVIU | Proportion of patients with no postoperative recurrent urethral stricture or who did not need further stricture treatment     | 35.5    | 14.75 months (5-36)      |
|                                                                                                                                                                                                                                                                                                                                                             | Chhabra, J. S. et al.    | 8-cm, 24-French urethral Balloon catheter set (Cook Urological, Spencer, Ind., USA) | /    | Proportion of patients who did not need further stricture treatment during the follow-up period                               | 84.4    | 24 months (3-52)         |
|                                                                                                                                                                                                                                                                                                                                                             | Ishii, Gen et al.        | 6-cm, 6-French Balloon catheter, the X Force®                                       | /    | Proportion of patients with no recurrence of stricture during the follow-up period                                            | 80      | 24 months (7-67)         |
|                                                                                                                                                                                                                                                                                                                                                             | Mao, D. et al.           | 24-French Nephrostomy balloon dilation catheter, the X Force®                       | /    | Proportion of patients who did not need further stricture treatment during the follow-up period                               | 64.9    | /                        |
|                                                                                                                                                                                                                                                                                                                                                             | Vyas, J. B. et al.       | 8-cm, 24-French urethral Balloon catheter set (Cook Urological, Spencer, Ind., USA) | /    | Proportion of patients who did not need further stricture treatment during the follow-up period                               | 68      | 6 months (2-60)          |
|                                                                                                                                                                                                                                                                                                                                                             | Alguersuari, A. et al.   | fluoroscopic- guided balloon dilation                                               | /    | Proportion of patients who did not need further stricture treatment during the follow-up period                               | 69      | /                        |
|                                                                                                                                                                                                                                                                                                                                                             | MacDiarmid, S. A. et al. | The UrethraMax (4, 6, or 8-cm; 24-French) or a coude tip balloon dilation catheter  | /    | Proportion of patients who did not need further stricture treatment during the follow-up period                               | 55      | 9 months (1-16)          |
|                                                                                                                                                                                                                                                                                                                                                             | Mohammed, S. H. et al.   | Olbert balloon catheter                                                             | /    | Proportion of patients who did not need further stricture treatment during the follow-up period                               | 66.7    | 12 months (6-26)         |

DVIU, direct vision internal urethrotomy; OIU, optical internal urethrotomy.

**Table 3: Changes in the urinary flow rate, PVR, and IPSS after balloon dilation. (The following table is continued to the right)**

| Study                         | Location of the Strictures                                                         | Length of Strictures                         |
|-------------------------------|------------------------------------------------------------------------------------|----------------------------------------------|
| Virasoro, Ramon et al. 2022   | Anterior urethra                                                                   | ≤ 2 cm                                       |
| Elliott, S. P. et al. 2022    | Anterior urethra                                                                   | ≤ 3 cm                                       |
| Zhou, Y. et al. 2016          | Anterior urethra (n=36, 80%);<br>posterior urethra (n=9, 20%)                      | ≤ 2 cm                                       |
| Chhabra, J. S. et al. 2016    | Anterior urethra (n=110,<br>76%); posterior urethra (n=8,<br>6%); both (n=26, 18%) | ≤ 1.5 cm (n=130, 90%);<br>> 1 cm (n=14, 10%) |
| Vyas, J. B. et al. 2013       | Anterior urethra (n=114,<br>95%); posterior urethra (n=6,<br>5%)                   | ≤ 1.5 cm                                     |
| MacDiarmid, S. A. et al. 2000 | Anterior urethra (n=49, 96%);<br>posterior urethra (n=2, 4%)                       | /                                            |

| IPSS                 |                          |                          |                          |                          |                      |  |
|----------------------|--------------------------|--------------------------|--------------------------|--------------------------|----------------------|--|
| Before surgery       | 3 months                 | 6 months                 | 1 year                   | 2 years                  | 3 years              |  |
| 25.2 ± 4.5<br>(n=53) | 6.1 ± 7.6<br>(n=51)      | 4.6 ± 5.2<br>(n=45)      | 4.5 ± 3.9<br>(n=40)      | 6.9 ± 7.7<br>(n=38)      | 5.5 ± 6.9<br>(n=33)  |  |
| 22.0 ± 6.8<br>(n=79) | 7.4 ± 5.8<br>(n=74)      | 8.3 ± 6.2<br>(n=71)      | 9.0 ± 7.1<br>(n=67)      | /                        | /                    |  |
| /                    | /                        | /                        | /                        | /                        | /                    |  |
| /                    | /                        | 12.7<br>(n=112)          | 12.6<br>(n=112)          | /                        | /                    |  |
| 21.6<br>(n=120)      | 11.4<br>(n=120)          | 12.6<br>(n=120)          | /                        | /                        | /                    |  |
| /                    | /                        | /                        | /                        | /                        | /                    |  |
| Qmax (mL/sec)        |                          |                          |                          |                          |                      |  |
| Before surgery       | 3 months                 | 6 months                 | 1 year                   | 2 years                  | 3 years              |  |
| 5.0 ± 2.6<br>(n=46)  | 22.2 ±<br>12.5<br>(n=51) | 19.8 ±<br>10.8<br>(n=45) | 20.1 ±<br>10.0<br>(n=39) | 17.5 ±<br>10.4<br>(n=38) | 15.1 ± 8.3<br>(n=33) |  |
| 7.6 ± 3.4<br>(n=78)  | 18.6 ±<br>10.9<br>(n=71) | 16.6 ± 8.9<br>(n=69)     | 15.5 ± 9.0<br>(n=65)     | /                        | /                    |  |

|                      |                      |                       |                       |   |   |
|----------------------|----------------------|-----------------------|-----------------------|---|---|
| 5.6 ± 1.4<br>(n=45)  | 19.8 ± 3.9<br>(n=45) | /                     | /                     | / | / |
| 5.2 ± 2.7<br>(n=144) | /                    | 15.4 ± 7.2<br>(n=112) | 12.6 ± 5.7<br>(n=112) | / | / |
| 5.7<br>(n=120)       | 14.3<br>(n=120)      | 12.7<br>(n=120)       | /                     | / | / |
| 10.4<br>(n=48)       | 15.3<br>(n=43)       | 17.7<br>(n=27)        | 15.2<br>(n=5)         | / | / |

| PVR (mL)             |                      |                     |                     |                    |                    |
|----------------------|----------------------|---------------------|---------------------|--------------------|--------------------|
| Before surgery       | 3 months             | 6 months            | 1 year              | 2 years            | 3 years            |
| 141.4 ± 105.1 (n=43) | 141.4 ± 105.1 (n=51) | 30.0 ± 42.8 (n=45)  | 24.6 ± 32.1 (n=39)  | 45.5 ± 49.5 (n=38) | 50.2 ± 62.5 (n=33) |
| 109.8 ± 116.9 (n=77) | 103.4 ± 134.4 (n=70) | 73.1 ± 117.7 (n=67) | 94.6 ± 121.8 (n=66) | /                  | /                  |
| /                    | /                    | /                   | /                   | /                  | /                  |
| /                    | /                    | /                   | /                   | /                  | /                  |
| 90.2 (n=120)         | 34.2 (n=120)         | 20.2 (n=120)        | /                   | /                  | /                  |
| /                    | /                    | /                   | /                   | /                  | /                  |

IPSS, International Prostate Symptom Scores; Qmax, maximum uroflow; PVR, postvoid residual urine volume.

**Table 4: Changes in the USS-PROM score, IPSS-QOL, and IIEF score after balloon dilation.**

| Study: Virasoro, Ramon et al. 2022 |                       |                       |                     |                     |                     |                       |
|------------------------------------|-----------------------|-----------------------|---------------------|---------------------|---------------------|-----------------------|
| Scoring items                      | Before surgery        | 3 months              | 6 months            | 1 year              | 2 years             | 3 years               |
| USS-PROM                           | 15.9 ± 4.7<br>(n=53)  | 3.2 ± 5.5<br>(n=51)   | 1.9 ± 2.9<br>(n=45) | 1.4 ± 1.8<br>(n=40) | 3.6 ± 5.8<br>(n=38) | 2.0 ± 3.5<br>(n=33)   |
| IPSS QoL                           | 4.9 ± 0.9<br>(n=53)   | 0.8 ± 1.3<br>(n=51)   | 0.7 ± 0.9<br>(n=45) | 0.7 ± 0.9<br>(n=40) | 0.9 ± 1.5<br>(n=38) | 0.7 ± 1.2<br>(n=33)   |
| IIEF - OS                          | 6.5 ± 2.6<br>(n=53)   | 7.9 ± 2.5<br>(n=51)   | 7.9 ± 2.5<br>(n=45) | 8.1 ± 2.5<br>(n=40) | 7.6 ± 2.5<br>(n=38) | 8.2 ± 2.2<br>(n=33)   |
| IIEF - EF                          | 16.0 ± 12.2<br>(n=53) | 20.7 ± 12.0<br>(n=51) | 21.0 ± 11.8         | 22.1 ± 10.9         | 21.1 ± 11.9         | 22.5 ± 11.2<br>(n=33) |



|                                          |                     |                     | (n=45)              | (n=40)              | (n=38)              |   |
|------------------------------------------|---------------------|---------------------|---------------------|---------------------|---------------------|---|
| <b>Study: Elliott, S. P. et al. 2022</b> |                     |                     |                     |                     |                     |   |
| Scoring items                            | Before surgery      | 30 days             | 3 months            | 6 months            | 1 year              | / |
| IPSS QoL                                 | 4.5 ± 1.3<br>(n=79) | 1.7 ± 1.4<br>(n=78) | 1.6 ± 1.4<br>(n=74) | 1.7 ± 1.3<br>(n=71) | 1.9 ± 1.5<br>(n=67) | / |
| IIEF                                     | 5.8 ± 2.9<br>(n=72) | 5.9 ± 2.8<br>(n=75) | 6.6 ± 2.7<br>(n=71) | 6.5 ± 2.8<br>(n=68) | 6.9 ± 3.0<br>(n=59) | / |

USS-PROM, Patient-Reported Outcome Measure for Urethral Stricture Surgery; IPSS, International Prostate Symptom Score - Quality of Life; IIEF, International Index of Erectile Function; IIEF, International Index of Erectile Function – overall satisfaction domain; IIEF, International Index of Erectile Function – erectile function domain.

### 3.5.4 Comparison of balloon dilation with other endoluminal treatments

We conducted an analysis of two studies comparing DVIU and optical internal urethrotomy (OIU) and found no significant difference in efficacy between conventional balloon dilation and internal urethrotomy (RR=1.4754, 95%CI: 0.7306-2.9793;  $z=1.085$ ,  $p=0.278$ ; heterogeneity:  $I^2=0\%$ ,  $p=0.351$ ) (Figure 2B). Even though fewer comparative studies are currently available, the balloon dilation may have potentially favorable long-term results by virtue of its smaller shear force and uniform 360° circumferential dilation. Yu, S. C. et al. reported that the estimated stricture-free survival rate at 12 months was 77.42% after balloon dilation and 48.00% after DVIU; moreover, a significantly higher stricture-free survival rate was observed in the balloon dilation group ( $P=0.02<0.05$ , HR=0.35, 95% CI for HR: 0.14–0.87) [31]. In Kumano, Y.'s study, the balloon dilation group had significantly longer stricture-free times than the optical internal urethrotomy group ( $p<0.01$ ), with median (mean) stricture-free times of 1675 (1673) and 244 (599) days, respectively [30]. Currently, there are no studies comparing the clinical outcomes of simple dilation versus balloon dilation. Due to the paucity of current studies, no adequate evidence exists to suggest that balloon dilation is superior to other conventional endoluminal therapies.

## 3.6 Clinical preference and efficacy influencing factors of balloon dilation

### 3.6.1 Etiology

We pooled eight studies of simple balloon dilation that addressed specific etiologies [29-31, 33, 35-37, 41] involving a total of 307 patients. Iatrogenic urethral strictures (43.32%, 133/307) and idiopathic urethral strictures (34.20%, 105/307) accounted for the vast majority of cases. Stricture caused by trauma or inflammation accounted for 14.66% (45/307) and 6.51% (20/307), respectively. Four patients also suffered from radiation. Although this is only a one-sided epitome, it follows that iatrogenic injury may become the main etiology of urethral stricture in males in the future.

1  
2  
3 Due to the lack of meticulous subgroup analysis in the included studies, it was  
4 difficult for us to directly compare the differences in efficacy among strictures caused  
5 by different etiologies. The influence of etiology on the efficacy of balloon dilation  
6 depends primarily on the type of stenotic pathology it creates and the specific stenotic  
7 segment length and location. The essence of balloon dilation is the efficient expansion  
8 of the targeted site, taking care to avoid causing additional fibrosis of scar tissue in the  
9 narrow segment. If additional fibrosis occurs, strictures are highly likely to recur.  
10 Therefore, balloon dilation may not be suitable for strictures with a high degree of  
11 fibrosis. Lichen sclerosus is a specific cause of urethral stricture. The pathologic  
12 features of lichen sclerosus include hyperkeratosis or epithelial atrophy, basal cell  
13 vacuolar degeneration, lichenoid lymphocytic infiltration, and upper epithelial  
14 sclerosis [44]. This epithelial stromal lesion characterized by squamous atrophy or  
15 hyperplasia is distinct from the fibrotic pathologic characterization of most urethral  
16 strictures. A recent review pooling expert opinions in urology stated that dilation is  
17 unlikely to be a successful long-term solution for lichenoid sclerosing urethral  
18 stricture, potentially triggering adverse outcomes in the long term [45]. Balloon  
19 dilation is essentially a physical treatment method that cannot pathologically or  
20 fundamentally improve the condition of patients with specific urethral strictures, and  
21 its clinical indications need to be strictly controlled.  
22  
23  
24  
25  
26  
27  
28

### 29 **3.6.2 Location of the urethral stricture**

30 We combined 11 studies that identified the location of the stricture [29, 32-41] ;  
31 74.28% (488/657) were anterior urethral stricture, 21.77% (143/657) were posterior  
32 urethral stricture, and 3.95% (26/657) were both. Most patients who undergo balloon  
33 dilation are have anterior urethral stricture.  
34  
35

36 Most of the current studies have not further categorized comparisons of balloon  
37 dilation based on differences in stricture location, and the data of patients with  
38 stricture at different sites were analysed together. A subgroup analysis of eight  
39 conventional balloon dilation studies that involved the combination of success rates  
40 [31, 32, 34-36, 38-40] was performed according to the percentage of anterior urethral  
41 strictures, and the results are shown in Supplementary Figure 4. The combined results  
42 of studies with mostly anterior urethral strictures (70%-90%) reported a success rate  
43 of 66.45% (95% CI: 47.58%-83.01%) for balloon dilation.  
44  
45

46 Moreover, we combined data from two studies [32, 34] that included a subgroup  
47 analysis of stricture location and did not find any significant difference in the efficacy  
48 of balloon dilation between anterior and posterior urethral strictures (RR=0.9568, 95%  
49 CI: 0.6618-1.3832, p=0.814) (Figure 3A).  
50  
51

### 52 **3.6.3 Length of urethral stricture**

53 We previously performed a subgroup analysis of the pooled conventional balloon  
54 dilation success rate [31, 32, 34-36, 38-40] according to the length of the urethral  
55 stricture, and the results are shown in Figure 3B. For shorter strictures ( $\leq 2$  cm), the  
56 success rate of balloon dilation reached 71.58% (95% CI: 61.93%-80.35%), and  
57 heterogeneity was also reduced ( $I^2=63.2342\%$ ,  $p < 0.05$ ) (Figure 3B). In a study of  
58  
59  
60

1  
2  
3 patients with anterior urethral strictures less than 1 cm in length, the success rate was  
4 as high as 85.7% [33]. The reduction in heterogeneity of the pooled results suggested  
5 that the stenotic segment length is a prognostic factor, and balloon dilation for  
6 short-segment urethral strictures may have a higher success rate.  
7  
8

### 9 10 **3.6.4 Age**

11 We further stratified the previous eight studies [31, 32, 34-36, 38-40] according to age  
12 group, and the results are shown in Figure 3C. In the 50- to 60-year-old age group, the  
13 success rate of balloon dilation was 80.79% (95% CI: 74.42%-86.47%). However, for  
14 patients older than 60 years, the success rate decreased to 58.49% (95% CI:  
15 50.61%-66.17%). Interestingly, the combined success rate was 65.39% (95% CI:  
16 39.61%-87.22%) in relatively young patients, probably because some of the reported  
17 younger patients had more severe strictures. The etiology of strictures in elderly  
18 patients is often iatrogenic, whereas in younger patients, more complex urethral  
19 strictures can be caused by relatively specific factors such as trauma and lichenoid  
20 sclerosis gonorrhoea. Even though the success rate is unclear, we can see a decreasing  
21 trend in the efficacy of balloon dilation in elderly patients.  
22  
23

### 24 25 26 **3.6.5 Prior intervention management**

27 A separate analysis of patients who had received prior endoscopic management  
28 (catheter/balloon dilation, direct visual internal urethrotomy) was performed in two  
29 studies [32, 34], and we found that balloon dilation had a pooled success rate of  
30 49.51% (95% CI: 39.79%-59.26%) (Figure 3D). In patients who previously  
31 underwent surgical intervention, the efficacy of balloon dilation may be lower. Based  
32 on the limited data available in these two studies [32, 34], we compared the success  
33 rates of conventional balloon dilation in patients who did and did not undergo  
34 previous urethroplasty and found no significant difference (RR=1.1682, 95%CI:  
35 0.6160-2.2153, p=0.634) (Supplementary Figure 5A). The prevailing clinical view is  
36 that repeated endoluminal intervention may render further endoluminal treatment less  
37 effective, but this needs to be confirmed by clinical studies with larger sample sizes.  
38  
39

### 40 41 42 **3.6.6 Other patient status**

43 We performed a more nuanced subgroup analysis of the two studies [32, 34] that  
44 provided some patient baseline details. There was no statistically significant  
45 difference in balloon dilation efficacy between patients with and without a smoking  
46 history (RR=1.1052, 95% CI: 0.8083-1.5112, p=0.531) (Supplementary Figure 5B).  
47 Chronic diseases such as coronary artery disease (RR=1.0714, 95% CI:  
48 0.7618-1.5069, p=0.692), diabetes mellitus (RR=0.9144, 95% CI: 0.6118-1.3666,  
49 p=0.662), hypertension (RR=0.8377, 95% CI: 0.6121-1.1464, p=0.269), and chronic  
50 obstructive pulmonary disease (RR=1.3515, 95% CI: 0.7495-2.4374, p=0.317) did not  
51 significantly affect the efficacy of balloon dilation (Supplementary Figure 5C-F). Our  
52 preliminary analysis suggested that patient status, such as poor lifestyle habits and  
53 chronic diseases, may not significantly impact the efficacy of balloon dilation.  
54  
55  
56  
57  
58  
59  
60

### 3.7 Intermittent urethral balloon self-dilation

Patient self-balloon dilation is a specific form of balloon dilation, and we also briefly review its clinical evaluation. Urethral dilation is easy to perform and can be performed by the patient at home, thereby avoiding the need for repeated hospitalizations and frequent general anaesthesia [46]. A study by Levine, L. A. [47] suggested that adjuvant balloon self-dilation at home may be a potential option for patients at high risk of recurrence. In this study of 25 eligible patients, most patients noted that balloon dilation improved voiding and maintained or improved the peak urinary flow rate at an average of 18.7 months after the initial procedure. Nonetheless, six patients (19%) complained of balloon placement discomfort, 3 (10%) noted minor bleeding during dilation, and 4 (13%) developed urinary tract infections during the follow-up period. Hennessey, D. B. 's initial experience with self-expanding balloon dilation in the outpatient setting was encouraging, with all 11 patients reporting that they were very satisfied or satisfied with their overall outcomes and quality of life [48]. A recent study reported in 2021 stated that self-urethral balloon dilation offers patients with complex strictures, especially those with a history of radiation, an opportunity to avoid surgical intervention [49].

However, the imprecision of patient self-balloon dilation may cause complications and even aggravate injury. As early as the last century, scholars have shown that short-term postoperative self-dilation techniques do not appear to prevent stricture recurrence in patients treated with endourethral incisions [50]. A meta-analysis of patient self-dilation also indicated that the quality of evidence for this approach to reduce the risk of recurrent urethral strictures is very low [51]. Although self-dilation is very convenient and avoids surgical complications, it is not suitable for all patients, and not all patients can master the skills and techniques of self-dilation. Self-dilation needs to be further weighed against surgery, and well-designed randomized controlled trials are needed to determine whether this benefit of convenience is sufficient to make this intervention worthwhile.

## 4. Discussion

With the gradual increase in the incidence of iatrogenic urethral strictures, surgeons should choose the appropriate treatment method according to the etiology of the urethral stricture, the location and length of the stricture, and the degree of urethral fibrosis. Even though there is no clear evidence that the clinical efficacy of balloon dilation is significantly better than that of other endoluminal treatments, such as simple dilation and DVIU, balloon dilation still has high clinical plasticity.

Both balloon dilation and simple dilation are essentially dilatation, causing tearing of scar tissue and scar remodelling at the site of the stricture. Balloon dilation involves the application of a 360° circumferential radial force at the stricture site, providing a more uniform force than simple dilation. Moreover, for harder scars that cannot be torn by simple dilation, the pressure of the balloon can be gradually increased to achieve dilatation, which has broader clinical indications.

Urethrotomy requires a radial incision at the site of the stricture. The main

1  
2  
3 disadvantage of internal urethrotomy is the inability to accurately estimate the depth  
4 of scar tissue during the procedure, resulting in imprecise scar tissue incisions. There  
5 may also be damage to the corpus cavernosum below the urethra, and vascular  
6 disruption in the corpus cavernosum and localized extravasation of urine through  
7 mucosal fissures may exacerbate corpus cavernosum fibrosis, eventually leading to  
8 stricture recurrence [31, 52]. Some scholars believe that balloon dilation tends to be  
9 performed in fewer fibrotic cases without urethral cavernous fibrosis, suggesting that  
10 balloon dilation will not invade the deep urethral membrane; therefore, even if the  
11 dilation time is longer, the restenosis rate of balloon dilation is lower than that of  
12 optical internal urethrotomy [30]. Thus, DVIU is commonly used for posterior  
13 urethral strictures and is avoided in the penile urethra to prevent leakage of the  
14 cavernous penile veins to circumvent the risk of causing impotence. Balloon dilation  
15 has no definitive stricture site limitations and can be effective in the dilatation of  
16 hard-textured scars that cannot be incised by DVIU. Yu, S. C. et al. reported that the  
17 operation time of balloon dilation was much shorter than that of DVIU ( $13.19 \pm 2.68$   
18 min vs.  $18.44 \pm 3.29$  min,  $P < 0.01$ ) [31], highlighting the operational simplicity of  
19 balloon dilation. Compared with urethrotomy, balloon dilation has a lower cost and  
20 can improve the efficiency of hospital bed turnover [53].

21 To reduce the high recurrence rate after endoluminal treatment, intraurethral lesion  
22 injections of drugs such as steroids and mitomycin C are commonly used, and  
23 balloons are considered promising forms of drug delivery [54]. The advent and use of  
24 drug-coated balloons can reduce inflammation and relapse rates by releasing drugs  
25 such as immunosuppressants during expansion. Barbalias, D. et al. conducted animal  
26 experiments using paclitaxel-coated balloons and reported that paclitaxel could pass  
27 through the urothelial barrier and immediately distribute to the urothelium,  
28 submucosa and smooth muscle layers of the normal rabbit urethra after dilation [55].  
29 The drug can penetrate the epithelium and act on deep urethral tissue, effectively  
30 reducing inflammation and inhibiting urethral fibrosis. In the recent ROBUST I study  
31 [28], an optilume drug-coated balloon (DCB) was shown to maintain symptom relief  
32 for 3 years after treatment in a highly susceptible population with recurrent urethral  
33 strictures. The 43 patients in this trial had a functional success rate of 67%, a  
34 retreatment-free rate of 77%, and an improvement in the mean IPSS from 25.2 at  
35 baseline to 5.5 at 3 years ( $p < 0.0001$ ). The 1-year results from another RCT (the  
36 ROBUST III study) [27] showed that patients dilated with an optilume DCB had a  
37 significantly higher anatomical success rate at 6 months than those in the DVIU group  
38 (75% vs. 27%,  $p < 0.001$ ). Both the symptoms and urinary flow rates improved  
39 significantly in both groups, but these effects were significantly more pronounced in  
40 the Optilume DCB group. The United States Food and Drug Administration (FDA)  
41 has approved the use of the Optilume drug-coated balloon for the treatment of male  
42 urethral strictures [56]. Nevertheless, in the ROBUST III study [27], the incidences of  
43 serious adverse events in the control group (DVIU/simple dilation) and DCB group  
44 were 16.7% and 10.1%, respectively. The types and incidences of adverse events in  
45 the two groups were closely matched, but the incidences of postoperative haematuria  
46 and dysuria were higher in the DCB group than in the control group (11.4% and 2.1%,  
47  
48  
49  
50  
51  
52  
53  
54  
55  
56  
57  
58  
59  
60



1  
2  
3 respectively). In addition, Rhenium-188 mercaptoacetyltriglycine-filled balloon  
4 dilation is expected to delay stricture recurrence in patients with urethral strictures. A  
5 clinical report of five patients revealed that the mean treatment interval was prolonged  
6 from 2.2 months to 10.7 months after Rhenium-188 mercaptoacetyltriglycine-filled  
7 balloon dilation [57]. Further consideration needs to be given to factors such as the  
8 local drug concentration achievable in dilation and the reliability of the therapeutic  
9 dose. The design of new balloons, such as cutting balloons, and the exploration of  
10 new expansion techniques may be research directions in the future [58, 59]. The new  
11 type of balloon should meet the biomechanical requirements to better fit the narrow  
12 urethra.  
13

14  
15  
16 The timing of balloon dilation is closely related to the location, length, and scar  
17 thickness of the stricture, and appropriate case selection is critical. Balloon dilation  
18 may be an intermediate step before urethroplasty and is a promising alternative  
19 therapy to simple dilation and DVIU. Like simple dilation and DVIU, balloon  
20 dilation is indicated for patients with short-segment urethral strictures. Although  
21 balloon dilatation is currently not definitively superior to simple dilation or DVIU due  
22 to the lack of long-term follow-up studies, balloon dilation has the following  
23 advantages: (1) In principle, the balloon expands with less shear force, presenting a  
24 gradual uniform 360° circular dilation so as to minimize the non-therapeutic urethral  
25 injuries; (2) In the penile urethra where DVIU is not recommended, simple dilation  
26 and balloon dilation can be used; (3) As long as the guidewire can be passed, simple  
27 dilation and balloon dilation can be attempted in stenotic segments in which the  
28 endoscope of the DVIU cannot pass; (4) The balloon, with its high pressure, can dilate  
29 some urethras with harder scars that are difficult to dilate with simple dilation and  
30 DVIU; (5) The balloon can be used as a promising drug delivery tool and has  
31 achieved favourable clinical results. For some patients with long complex urethral  
32 strictures, balloon dilation may even be used as an initial therapy. In patients with  
33 recurrent strictures, urethrotomy or urethral dilation followed by urethroplasty has  
34 been shown to be the most cost-effective strategy [60]. The use of endoscopic  
35 urethroplasty combined with balloon dilation for traumatic destruction of the prostatic  
36 membranous urethra has been previously reported [61]. Balloon dilation can also be  
37 used in conjunction with repeat simple dilation, endourethrotomy and urethroplasty. If  
38 urethroplasty is not feasible, patients can undergo intermittent self-dilation to stabilize  
39 the results after endoluminal therapy. Intermittent urethral balloon self-dilation may  
40 be an option, but its safety is difficult to ensure due to the lack of direct visualization  
41 control and difficulty in achieving the appropriate therapeutic pressure of the balloon.  
42 There is no standardized schedule for self-dilation, and the exact dilation schedule  
43 depends on the condition and the treatment recommended by the doctor. Patients are  
44 usually advised to start with more frequent dilation, even daily, and then gradually  
45 increase the interval. Intermittent self-dilation can continue for a fixed period of time  
46 or indefinitely. Nevertheless, intermittent self-dilation tends to stabilize the stricture  
47 and prolong recurrence rather than keep the patient stricture free [3]. The emergence  
48 of a new, safer, drug-coated balloon suitable for at-home use may prolong the patient  
49 self-dilation interval and bring new hope for future treatments.  
50  
51  
52  
53  
54  
55  
56  
57  
58  
59  
60

We recognize the limitations of our research. There is a considerable risk of bias in this meta-analysis, most of which stems from the retrospective design of the studies and the lack of valid controls. Evidence from retrospective observational studies needs to be interpreted with caution because of the susceptibility to selection bias, recall bias, and exaggerated efficacy of balloon dilation. The assessment of the efficacy of balloon dilation is often subjective, and it is difficult to use a clear objective measure. Patients have different perceptions of their voiding status, and patients' subjective feelings can influence their choice of therapeutic intervention. The efficacy of balloon dilation is also affected by confounding factors such as etiology, stricture location, stricture length, prior management intervention, comorbidities and socioeconomic status. The long-term outcomes of balloon dilation need to be further investigated. RCTs with larger sample sizes and more comparable control groups are needed to further prove the efficacy and safety of balloon dilation in the future.

## 5. Conclusion

Balloon dilation may be an intermediate step before urethroplasty and a promising alternative to simple dilation and DVIU. The balloon is a promising drug delivery tool, and paclitaxel drug-coated balloon dilation is effective in reducing retreatment rates in patients with recurrent anterior urethral strictures. Due to the low quality of the evidence, we have little confidence in our estimates of effects. Evidence for other comparisons and outcomes is also limited. The stricture etiology, stricture location, stricture length, and previous treatment may be associated with the efficacy of balloon dilation. However, additional high-quality studies are needed for further investigation.

## Contribution Statement

Conceptualization was created by X.L and C.X. Investigation was performed by X.L, X.J, and C.X. Analysis and interpretation of data were produced by X.L, X.J and C.X. X.L and C.X wrote the manuscript. X.L and X.J conducted the statistical analysis. Critical revision of the manuscript for important intellectual content was produced by X.L, C.X, Z.Z, T.C, Z.G and J.L. Supervision was performed by J.L.

## Acknowledgement

None.

## Conflict of Interest Statement

The authors have no conflicts of interest to declare.

## Funding Sources

This work was financially supported by the National Natural Science Foundation of China (Grant Nos. 8207032402).

## Statement of Ethics

The outcome of this meta-analysis could improve clinical decision and help to reduce the risk and cost of patients. All patients included in this study have signed informed consent during the course of each trial. And specific methods of assessment in each trial have been illustrated above. This systematic review did not any addition intervention to all included individuals. Thanks to all the patients and researchers included for their contribution to this study.

## Data availability statement

The datasets generated during and/or analysed during the current study are available from the corresponding author on reasonable request.

## References

- [1] Santucci RA, Joyce GF, Wise M. Male urethral stricture disease. *J Urol*. 2007;177:1667-74.
- [2] Verla W, Oosterlinck W, Spinoit AF, Waterloos M. A Comprehensive Review Emphasizing Anatomy, Etiology, Diagnosis, and Treatment of Male Urethral Stricture Disease. *Biomed Res Int*. 2019;2019:9046430.
- [3] Lumen N, Campos-Juanatey F, Greenwell T, Martins FE, Osman NI, Riechardt S, et al. European Association of Urology Guidelines on Urethral Stricture Disease (Part 1): Management of Male Urethral Stricture Disease. *European urology*. 2021;80:190-200.
- [4] Stein DM, Thum DJ, Barbagli G, Kulkarni S, Sansalone S, Pardeshi A, et al. A geographic analysis of male urethral stricture aetiology and location. *BJU Int*. 2013;112:830-4.
- [5] Cornu JN, Ahyai S, Bachmann A, de la Rosette J, Gilling P, Gratzke C, et al. A Systematic Review and



1  
2  
3  
4  
5  
6  
7  
8  
9  
10  
11  
12  
13  
14  
15  
16  
17  
18  
19  
20  
21  
22  
23  
24  
25  
26  
27  
28  
29  
30  
31  
32  
33  
34  
35  
36  
37  
38  
39  
40  
41  
42  
43  
44  
45  
46  
47  
48  
49  
50  
51  
52  
53  
54  
55  
56  
57  
58  
59  
60

Meta-analysis of Functional Outcomes and Complications Following Transurethral Procedures for Lower Urinary Tract Symptoms Resulting from Benign Prostatic Obstruction: An Update. *Eur Urol.* 2015;67:1066-96.

[6] Hollingsworth JM, Rogers MA, Krein SL, Hickner A, Kuhn L, Cheng A, et al. Determining the noninfectious complications of indwelling urethral catheters: a systematic review and meta-analysis. *Ann Intern Med.* 2013;159:401-10.

[7] Lo T, Vanni A, Cronin P. Urethral stricture as a complication of high dose rate brachytherapy for prostate cancer. *Radiotherapy and Oncology.* 2011;99:S390.

[8] Vanni A, Cronin P, Hamawy K, Roth R, Rote A, Leventhal HH, et al. Urethral stricture as a complication of high-dose-rate brachytherapy for clinically localized prostate cancer. *Brachytherapy.* 2010;9:S93.

[9] Wessells H, Angermeier KW, Elliott S, Gonzalez CM, Kodama R, Peterson AC, et al. Male Urethral Stricture: American Urological Association Guideline. *J Urol.* 2017;197:182-90.

[10] Wong SS, Aboumarzouk OM, Narahari R, O'Riordan A, Pickard R. Simple urethral dilatation, endoscopic urethrotomy, and urethroplasty for urethral stricture disease in adult men. *Cochrane Database Syst Rev.* 2012;12:Cd006934.

[11] Russinovich NAE, Lloyd LK, Griggs WP, Jander HP. Balloon dilatation of urethral strictures. *Urologic Radiology.* 1980;2:33-7.

[12] Pinot JJ, Hermanowicz M, Bonnet JL. Dilatation of the urethra by inflatable balloon catheter. *Nouvelle Presse Medicale.* 1983;12:163-4.

[13] Glesy JD, Finn JC, Hermann GD, Kinney TB, Fogarty TJ. Coaxial balloon dilation and calibration of urethral strictures. *The American Journal of Surgery.* 1984;147:611-4.

[14] Nishiyama T, Go H, Takashima A, Kawakami Y, Takeda M, Sato S. Balloon dilatation for entire urethral stricture. *Urologia Internationalis.* 1991;46:232-4.

[15] Hübler J, Solt J. Balloon catheter for the dilatation of the urethra. *Orvosi hetilap.* 1991;132:925-7.

[16] Rosa Arias J, Valdivia Uría JG, López López JA, Elizalde Amatria A. Pneumatic dilatation of urethral stenosis. *Archivos españoles de urología.* 1989;42:147-51.

[17] D'Agostino S, Campobasso P, Musi L, Cappellari F, Belloli G. Treatment of urethral stenoses in children using a balloon catheter. *La Pediatria medica e chirurgica : Medical and surgical pediatrics.* 1989;11:155-9.

[18] Perini L, Cavallo A, Perin B, Bigli G. Dilatation of benign urethral stenosis using a balloon catheter. *La Radiologia medica.* 1988;76:8-10.

[19] Acunas B, Acunas G, Gokmen E, Celik L. Balloon dilatation of iatrogenic urethral strictures. *European Journal of Radiology.* 1988;8:214-6.

[20] Xie T, Huang X, Xu Q, Ye H, Yang Q, Wang X. Balloon dilation by B ultrasound monitoring for treatment of urethral stricture: 5 case reports. *Beijing da xue xue bao Yi xue ban = Journal of Peking University Health sciences.* 2014;46:657-8.

[21] Gelman J, Liss MA, Cinman NM. Direct vision balloon dilation for the management of urethral strictures. *J Endourol.* 2011;25:1249-51; discussion 51.

[22] Page MJ, McKenzie JE, Bossuyt PM, Boutron I, Hoffmann TC, Mulrow CD, et al. The PRISMA 2020 statement: an updated guideline for reporting systematic reviews. *BMJ (Clinical research ed).* 2021;372:n71.

[23] Higgins JP, Altman DG, Gøtzsche PC, Jüni P, Moher D, Oxman AD, et al. The Cochrane Collaboration's tool for assessing risk of bias in randomised trials. *Bmj.* 2011;343:d5928.

- 1  
2  
3 [24] Jadad AR, Moore RA, Carroll D, Jenkinson C, Reynolds DJ, Gavaghan DJ, et al. Assessing the quality  
4 of reports of randomized clinical trials: is blinding necessary? *Control Clin Trials*. 1996;17:1-12.  
5 [25] Slim K, Nini E, Forestier D, Kwiatkowski F, Panis Y, Chipponi J. Methodological index for  
6 non-randomized studies (minors): development and validation of a new instrument. *ANZ J Surg*.  
7 2003;73:712-6.  
8 [26] Sterne JA, Hernán MA, Reeves BC, Savović J, Berkman ND, Viswanathan M, et al. ROBINS-I: a tool  
9 for assessing risk of bias in non-randomised studies of interventions. *BMJ (Clinical research ed)*.  
10 2016;355:i4919.  
11 [27] Elliott SP, Coutinho K, Robertson KJ, D'Anna R, Chevli K, Carrier S, et al. One-Year Results for the  
12 ROBUST III Randomized Controlled Trial Evaluating the Optilume® Drug-Coated Balloon for Anterior  
13 Urethral Strictures. *Journal of urology*. 2022;207:866 - 75.  
14 [28] Virasoro R, DeLong JM, Estrella RE, Pichardo M, Rodriguez Lay R, Espino G, et al. A Drug-Coated  
15 Balloon Treatment for Urethral Stricture Disease: Three-Year Results from the ROBUST I Study.  
16 *Research and reports in urology*. 2022;14:177-83.  
17 [29] Mohammed SH, Wirima J. Balloon catheter dilatation of urethral strictures. *AJR American journal*  
18 *of roentgenology*. 1988;150:327-30.  
19 [30] Kumano Y, Kawahara T, Mochizuki T, Takamoto D, Takeshima T, Kuroda S, et al. Management of  
20 urethral stricture: High-pressure balloon dilation versus optical internal urethrotomy. *LUTS: Lower*  
21 *Urinary Tract Symptoms*. 2019;11:O34-O7.  
22 [31] Yu SC, Wu HY, Wang W, Xu LW, Ding GQ, Zhang ZG, et al. High-pressure balloon dilation for male  
23 anterior urethral stricture: single-center experience. *Journal of Zhejiang University: Science B*.  
24 2016;17:722-7.  
25 [32] Beeder LA, Cook GS, Nealon SW, Badkhsan S, Sanders SC, Perito DP, et al. Long-Term Experience  
26 with Balloon Dilation for Short Bulbar and Membranous Urethral Strictures: Establishing a Baseline in  
27 the Active Drug Treatment Era. *Journal of Clinical Medicine*. 2022;11.  
28 [33] Alibekov MM, Katibov MI, Skorovarov AS, Gazimagomedov GA, Arbuliev KM, Savzikhanov RT, et  
29 al. The one-stage balloon dilatation with stone extraction for a combination of short urethral stricture  
30 and urethral stone in men. *Vestnik Urologii*. 2021;9:16-24.  
31 [34] Yi YA, Rozanski AT, Shakir NA, Viers BR, Ward EE, Bergeson RL, et al. Balloon dilation performs  
32 poorly as a salvage management strategy for recurrent bulbar urethral strictures following failed  
33 urethroplasty. *Translational Andrology and Urology*. 2020;9:3-9.  
34 [35] Zhou Y, Li G, Yan J, Shen C, Tang G, Xu G. Combination of the ureteral dilation catheter and  
35 balloon catheter under the ureteroscope in the treatment of male urethral stricture. *Zhonghua nan ke*  
36 *xue = National journal of andrology*. 2016;22:42-5.  
37 [36] Chhabra JS, Balaji SS, Singh A, Mishra S, Ganpule AP, Sabnis RB, et al. Urethral Balloon Dilatation:  
38 Factors Affecting Outcomes. *Urologia Internationalis*. 2016;96:427-31.  
39 [37] Ishii G, Naruoka T, Kasai K, Hata K, Omono H, Suzuki M, et al. High pressure balloon dilation for  
40 vesicourethral anastomotic strictures after radical prostatectomy. *BMC urology*. 2015;15:62.  
41 [38] Mao D, Yeqi N, Lu Y, Yijian L, Fangzhi C, Yinhuai W. Urethral dilatation with nephrostomy balloon  
42 dilation catheter for treatment of male patients with urethrostenosis. *Chinese Journal of Andrology*.  
43 2014;28:25-9.  
44 [39] Vyas JB, Ganpule AP, Muthu V, Sabnis RB, Desai MR. Balloon dilatation for male urethral  
45 strictures "revisited". *Urology Annals*. 2013;5:245-8.  
46 [40] Alguersuari A, Palaña P, Criado E, Fortuño JR, Falco-Fages JF. Fluoroscopic-guided balloon dilation

1  
2  
3 for urethral strictures: A feasible and effective approach for an old, unsolved problem. *CardioVascular and Interventional Radiology*. 2012;35:S279.

4  
5  
6 [41] MacDiarmid SA, Harrigan CT, Cottone JL, McIntyre WJ, Johnson DE. Assessment of a new  
7 transurethral balloon dilation catheter in the treatment of urethral stricture disease. *Urology*.  
8 2000;55:408-13.

9  
10 [42] Parente A, Angulo JM, Romero RM, Rivas S, Burgos L, Tardáguila A. Management of ureteropelvic  
11 junction obstruction with high-pressure balloon dilatation: long-term outcome in 50 children under 18  
12 months of age. *Urology*. 2013;82:1138-43.

13  
14 [43] Kumar P, Nargund VH. Management of post-radical prostatectomy anastomotic stricture by  
15 endoscopic transurethral balloon dilatation. *Scandinavian journal of urology and nephrology*.  
16 2007;41:314-5.

17  
18 [44] Liu JS, Walker K, Stein D, Prabhu S, Hofer MD, Han J, et al. Lichen sclerosus and isolated bulbar  
19 urethral stricture disease. *J Urol*. 2014;192:775-9.

20  
21 [45] Chung ASJ, Suarez OA. Current treatment of lichen sclerosus and stricture. *World J Urol*.  
22 2020;38:3061-7.

23  
24 [46] Searles JM, MacKinnon AE. Home-dilatation of the urethral meatus in boys. *BJU International*,  
25 Supplement. 2004;93:596-7.

26  
27 [47] Levine LA, Engebrecht BP. Adjuvant home urethral balloon dilation for the recalcitrant urethral  
28 stricture. *Journal of Urology*. 1997;158:818-21.

29  
30 [48] Hennessey DB, Thomas AZ, Forde JC, McDermott TED. Management of recalcitrant urethral  
31 strictures with self-dilatation balloon catheter. *Irish Journal of Medical Science*. 2013;182:227-30.

32  
33 [49] Monn MF, Virasoro R, DeLong J, Mc Cammon K. Natural history of patients using self urethral  
34 balloon dilation to manage urethral stricture. *Journal of Urology*. 2021;206:e970-e1.

35  
36 [50] Matanhelia SS, Salaman R, John A, Matthews PN. A prospective randomized study of  
37 self-dilatation in the management of urethral strictures. *Journal of the Royal College of Surgeons of*  
38 *Edinburgh*. 1995;40:295-7.

39  
40 [51] Ivaz SL, Veeratterapillay R, Jackson MJ, Harding CK, Dorkin TJ, Andrich DE, et al. Intermittent  
41 self-dilatation for urethral stricture disease in males: A systematic review and meta-analysis.  
42 *Neurourol Urodyn*. 2016;35:759-63.

43  
44 [52] Isen K, Nalçacıoğlu V. Direct vision internal urethrotomy by using endoscopic scissors. *Int Urol*  
45 *Nephrol*. 2015;47:905-8.

46  
47 [53] Sur H, Dowson C, Jabbar T, Phillips J, Blacker A. A cost based rationale for redefining the  
48 management of urethral strictures. *Journal of Endourology*. 2012;26:A391-A2.

49  
50 [54] Pang KH, Chapple CR, Chatters R, Downey AP, Harding CK, Hind D, et al. A Systematic Review and  
51 Meta-analysis of Adjuncts to Minimally Invasive Treatment of Urethral Stricture in Men. *European*  
52 *urology*. 2021;80:467-79.

53  
54 [55] Barbalias D, Lappas G, Ravazoula P, Liourdi D, Kyriazis I, Liatsikos E, et al. Evaluation of the  
55 Distribution of Paclitaxel after Application of a Paclitaxel-Coated Balloon in the Rabbit Urethra.  
56 *Journal of Endourology*. 2018;32:381-6.

57  
58 [56] FDA approves the Optilume urethral drug coated balloon for the treatment of urethral strictures.  
59 *BJU international*. 2022;129:305.

60  
[57] Shin JH, Song HY, Moon DH, Oh SJ, Kim TH, Lim JO. Rhenium-188 mercaptoacetyl triglycine-filled  
balloon dilation in the treatment of recurrent urethral strictures: Initial experience with five patients.  
*Journal of Vascular and Interventional Radiology*. 2006;17:1471-7.

1  
2  
3 [58] Hosseini J, Fallah-Karkan M, Rahavian A, Soleimanzadeh F, Salimi H, Ghadimi K, et al. Feasibility,  
4 complication and long-term follow-up of the newly nelaton based urethral dilation method,  
5 retrospective study. American journal of clinical and experimental urology. 2019;7:378-83.

6  
7 [59] Yildirim E, Cicek T, Istanbuluoglu O, Ozturk B. Use of cutting balloon in the treatment of urethral  
8 stricture: A novel technique. CardioVascular and Interventional Radiology. 2009;32:525-8.

9  
10 [60] Greenwell TJ, Castle C, Andrich DE, MacDonald JT, Nicol DL, Mundy AR. Repeat urethrotomy and  
11 dilation for the treatment of urethral stricture are neither clinically effective nor cost-effective. The  
12 Journal of urology. 2004;172:275-7.

13  
14 [61] Stillwell TJ, Patterson DE, LeRoy AJ. Endoscopic Urethroplasty with Balloon Dilatation for  
15 Traumatic Disruption of the Prostatomembranous Urethra. Journal of endourology. 1988;2:257-61.

## 16 17 18 19 **Figure legends**

20  
21  
22 Figure 1: Flow diagram of study selection.

23  
24  
25 Figure 2: Forest plots showing the efficacy of balloon dilation. (A) Success rate of conventional  
26 balloon dilation; (B) Balloon dilation (Drug-coated balloons excluded) compared with simple dilation,  
27 DVIU, and optical internal urethrotomy (OIU). CI, confidence interval.

28  
29  
30  
31  
32 Figure 3: Forest plots showing the possible influencing factors of balloon dilation. (A) Location of the  
33 urethral stricture; (B) Length of urethral stricture; (C) Age; (D) Prior endoscopic management. CI,  
34  
35  
36  
37  
38  
39  
40  
41  
42  
43  
44  
45  
46  
47  
48  
49  
50  
51  
52  
53  
54  
55  
56  
57  
58  
59  
60  
confidence interval.

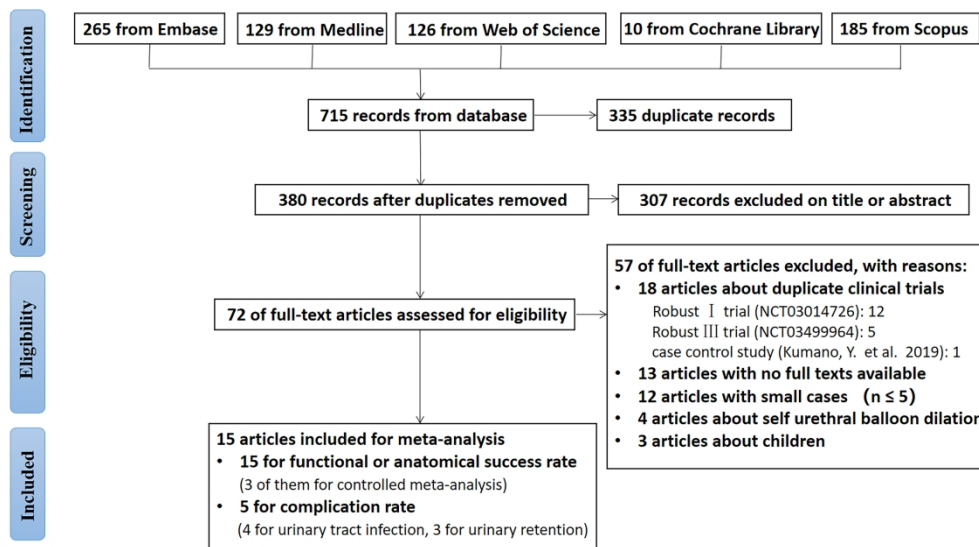

25  
26  
27  
28  
29  
30  
31  
32  
33  
34  
35  
36  
37  
38  
39  
40  
41  
42  
43  
44  
45  
46  
47  
48  
49  
50  
51  
52  
53  
54  
55  
56  
57  
58  
59  
60

Figure 1: Flow diagram of study selection.

338x190mm (300 x 300 DPI)

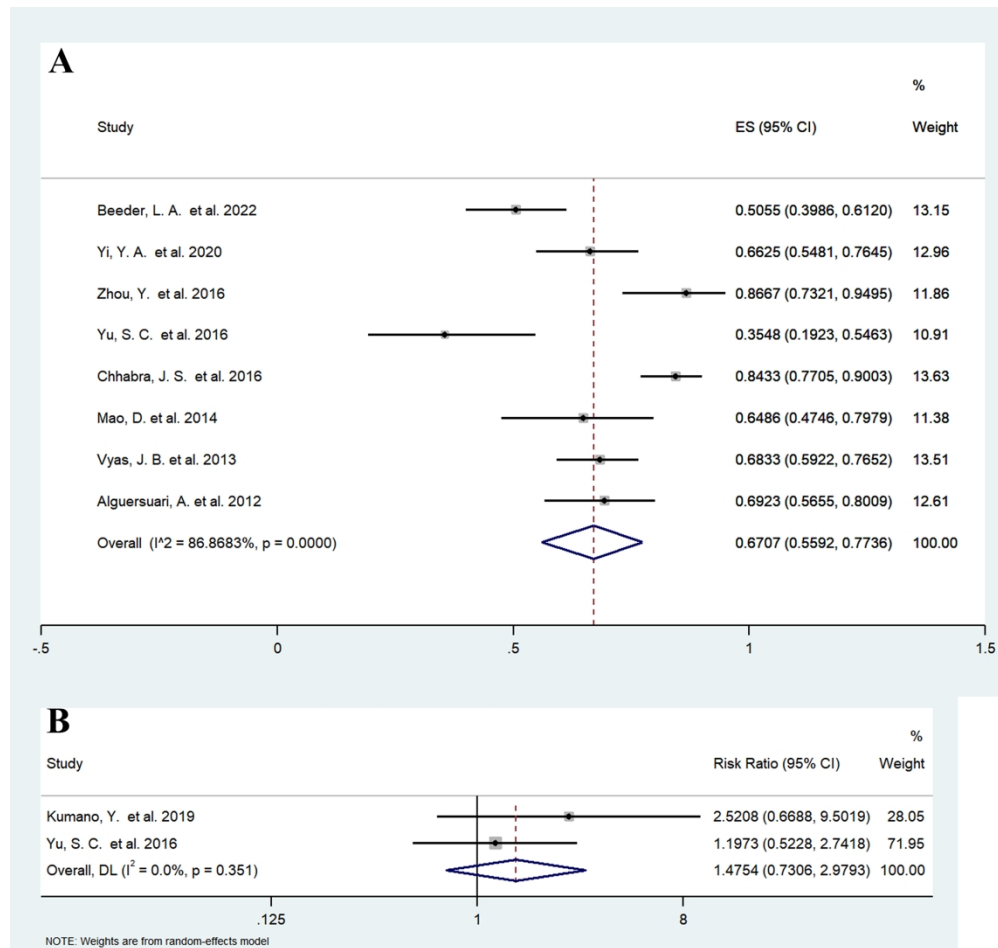

Figure 2: Forest plots showing the efficacy of balloon dilation. (A) Success rate of simple balloon dilation; (B) Balloon dilation (Drug-coated balloons excluded) compared with simple dilation, DVIU, and optical internal urethrotomy (OIU). CI, confidence interval.

209x198mm (300 x 300 DPI)



Figure 3: Forest plots showing the possible influencing factors of balloon dilation. (A) Location of urethral stricture; (B) Length of urethral stricture; (C) Age; (D) Prior endoscopic management. CI, confidence interval.

144x297mm (300 x 300 DPI)



### Supplementary File. Search strategy

(Urethral Stricture OR Stricture, Urethral OR Strictures, Urethral OR Urethral Strictures OR Urethral Stenosis OR Stenoses, Urethral OR Stenosis, Urethral OR Urethral Stenoses OR Anterior Urethral Stricture OR Anterior Urethral Strictures OR Urethral Strictures, Anterior OR Urethral Stricture, Anterior OR Posterior Urethral Stricture OR Posterior Urethral Strictures OR Urethral Strictures, Posterior OR Urethral Stricture, Posterior) AND (Dilatation OR Dilatations OR Dilation OR Dilations) AND (Balloon)

#### MEDLINE

#1. TS=(Urethral Stricture OR Stricture, Urethral OR Strictures, Urethral OR Urethral Strictures OR Urethral Stenosis OR Stenoses, Urethral OR Stenosis, Urethral OR Urethral Stenoses OR Anterior Urethral Stricture OR Anterior Urethral Strictures OR Urethral Strictures, Anterior OR Urethral Stricture, Anterior OR Posterior Urethral Stricture OR Posterior Urethral Strictures OR Urethral Strictures, Posterior OR Urethral Stricture, Posterior)

#2. TS=(Dilatation OR Dilatations OR Dilation OR Dilations)

#3. TS=(Balloon)

**#1 AND #2 AND #3**

#### Web of Science (WOS)

#1. TS=(Urethral Stricture OR Stricture, Urethral OR Strictures, Urethral OR Urethral Strictures OR Urethral Stenosis OR Stenoses, Urethral OR Stenosis, Urethral OR Urethral Stenoses OR Anterior Urethral Stricture OR Anterior Urethral Strictures OR Urethral Strictures, Anterior OR Urethral Stricture, Anterior OR Posterior Urethral Stricture OR Posterior Urethral Strictures OR Urethral Strictures, Posterior OR Urethral Stricture, Posterior)

#2. TS=(Dilatation OR Dilatations OR Dilation OR Dilations)

#3. TS=(Balloon)

**#1 AND #2 AND #3**

#### EMBASE

#1. 'Stricture, Urethral':ab,ti OR 'Strictures, Urethral':ab,ti OR 'Urethral Strictures':ab,ti OR 'Urethral Stenosis':ab,ti OR 'Stenoses, Urethral':ab,ti OR 'Stenosis, Urethral':ab,ti OR 'Urethral Stenoses':ab,ti OR 'Anterior Urethral Stricture':ab,ti OR 'Anterior Urethral Strictures':ab,ti OR 'Urethral Strictures, Anterior':ab,ti OR 'Urethral Stricture, Anterior':ab,ti OR 'Posterior Urethral Stricture':ab,ti OR 'Posterior Urethral Strictures':ab,ti OR 'Urethral Strictures, Posterior':ab,ti OR 'Urethral Stricture, Posterior':ab,ti

#2. 'Dilatation':ab,ti OR 'Dilatations':ab,ti OR 'Dilation':ab,ti OR 'Dilations':ab,ti

#3. 'Balloon':ab,ti

**#1 AND #2 AND #3**

#### Cochrane Library

#1. (Urethral Stricture):ti,ab OR (Strictures, Urethral):ti,ab OR (Stricture, Urethral):ti,ab OR (Urethral Strictures):ti,ab OR (Urethral Stenosis):ti,ab OR (Stenoses, Urethral):ti,ab OR (Stenosis, Urethral):ti,ab OR (Urethral Stenoses):ti,ab OR (Anterior Urethral Stricture):ti,ab OR (Anterior

1  
2  
3 Urethral Strictures):ti,ab OR (Urethral Strictures, Anterior):ti,ab OR (Urethral Stricture,  
4 Anterior):ti,ab OR (Posterior Urethral Stricture):ti,ab OR (Posterior Urethral Strictures):ti,ab OR  
5 (Urethral Strictures, Posterior):ti,ab OR (Urethral Stricture, Posterior):ti,ab  
6  
7 #2. (Dilatations):ti,ab OR (Dilatation):ti,ab OR (Dilation):ti,ab OR (Dilations):ti,ab  
8  
9 #3. (Balloon):ti,ab  
10 **#1 AND #2 AND #3**

### Scopus

11  
12  
13  
14 #1. TITLE-ABS-KEY("Urethral Stricture" OR "Stricture, Urethral" OR "Strictures, Urethral" OR  
15 "Urethral Strictures" OR "Urethral Stenosis" OR "Stenoses, Urethral" OR "Stenosis, Urethral" OR  
16 "Urethral Stenoses" OR "Anterior Urethral Stricture" OR "Anterior Urethral Strictures" OR  
17 "Urethral Strictures, Anterior" OR "Urethral Stricture, Anterior" OR "Posterior Urethral Stricture"  
18 OR "Posterior Urethral Strictures" OR "Urethral Strictures, Posterior" OR "Urethral Stricture,  
19 Posterior")  
20  
21 #2. TITLE-ABS-KEY( "Dilatation" OR "Dilatations" OR "Dilation" OR "Dilations")  
22  
23 #3. TITLE-ABS-KEY("Balloon")  
24 **#1 AND #2 AND #3**

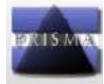

## PRISMA 2020 Checklist

| Section and Topic             | Item # | Checklist item                                                                                                                                                                                                                                                                                       | Reported on page # |
|-------------------------------|--------|------------------------------------------------------------------------------------------------------------------------------------------------------------------------------------------------------------------------------------------------------------------------------------------------------|--------------------|
| <b>TITLE</b>                  |        |                                                                                                                                                                                                                                                                                                      |                    |
| Title                         | 1      | Identify the report as a systematic review, meta-analysis, or both.                                                                                                                                                                                                                                  | 1                  |
| <b>ABSTRACT</b>               |        |                                                                                                                                                                                                                                                                                                      |                    |
| Abstract                      | 2      | See the PRISMA 2020 for Abstracts checklist.                                                                                                                                                                                                                                                         | 2                  |
| <b>INTRODUCTION</b>           |        |                                                                                                                                                                                                                                                                                                      |                    |
| Rationale                     | 3      | Describe the rationale for the review in the context of existing knowledge.                                                                                                                                                                                                                          | 3                  |
| Objectives                    | 4      | Provide an explicit statement of the objective(s) or question(s) the review addresses.                                                                                                                                                                                                               | 3                  |
| <b>METHODS</b>                |        |                                                                                                                                                                                                                                                                                                      |                    |
| Eligibility criteria          | 5      | Specify the inclusion and exclusion criteria for the review and how studies were grouped for the syntheses.                                                                                                                                                                                          | 4                  |
| Information sources           | 6      | Specify all databases, registers, websites, organisations, reference lists and other sources searched or consulted to identify studies. Specify the date when each source was last searched or consulted.                                                                                            | 4                  |
| Search strategy               | 7      | Present the full search strategies for all databases, registers and websites, including any filters and limits used.                                                                                                                                                                                 | 4                  |
| Selection process             | 8      | Specify the methods used to decide whether a study met the inclusion criteria of the review, including how many reviewers screened each record and each report retrieved, whether they worked independently, and if applicable, details of automation tools used in the process.                     | 4                  |
| Data collection process       | 9      | Specify the methods used to collect data from reports, including how many reviewers collected data from each report, whether they worked independently, any processes for obtaining or confirming data from study investigators, and if applicable, details of automation tools used in the process. | 4                  |
| Data items                    | 10a    | List and define all outcomes for which data were sought. Specify whether all results that were compatible with each outcome domain in each study were sought (e.g. for all measures, time points, analyses), and if not, the methods used to decide which results to collect.                        | 4                  |
|                               | 10b    | List and define all other variables for which data were sought (e.g. participant and intervention characteristics, funding sources). Describe any assumptions made about any missing or unclear information.                                                                                         | 4                  |
| Study risk of bias assessment | 11     | Specify the methods used to assess risk of bias in the included studies, including details of the tool(s) used, how many reviewers assessed each study and whether they worked independently, and if applicable, details of automation tools used in the process.                                    | 4                  |
| Effect measures               | 12     | Specify for each outcome the effect measure(s) (e.g. risk ratio, mean difference) used in the synthesis or presentation of results.                                                                                                                                                                  | 4                  |
| Synthesis methods             | 13a    | Describe the processes used to decide which studies were eligible for each synthesis (e.g. tabulating the study intervention characteristics and comparing against the planned groups for each synthesis (item #5)).                                                                                 | 4, 5               |
|                               | 13b    | Describe any methods required to prepare the data for presentation or synthesis, such as handling of missing summary statistics, or data conversions.                                                                                                                                                | 4, 5               |
|                               | 13c    | Describe any methods used to tabulate or visually display results of individual studies and syntheses.                                                                                                                                                                                               | 4, 5               |
|                               | 13d    | Describe any methods used to synthesize results and provide a rationale for the choice(s). If meta-analysis was performed, describe the model(s), method(s) to identify the presence and extent of statistical heterogeneity, and software package(s) used.                                          | 4, 5               |
|                               | 13e    | Describe any methods used to explore possible causes of heterogeneity among study results (e.g. subgroup analysis, meta-regression).                                                                                                                                                                 | 4, 5               |
|                               | 13f    | Describe any sensitivity analyses conducted to assess robustness of the synthesized results.                                                                                                                                                                                                         | NA                 |
| Reporting bias assessment     | 14     | Describe any methods used to assess risk of bias due to missing results in a synthesis (arising from reporting biases).                                                                                                                                                                              | 4                  |
| Certainty assessment          | 15     | Describe any methods used to assess certainty (or confidence) in the body of evidence for an outcome.<br>For peer review only - <a href="http://bmjopen.bmj.com/site/about/guidelines.xhtml">http://bmjopen.bmj.com/site/about/guidelines.xhtml</a>                                                  | 4                  |

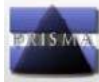

## PRISMA 2020 Checklist

1  
2  
3  
4  
5  
6  
7  
8  
9  
10  
11  
12  
13  
14  
15  
16  
17  
18  
19  
20  
21  
22  
23  
24  
25  
26  
27  
28  
29  
30  
31  
32  
33  
34  
35  
36  
37  
38  
39  
40  
41  
42  
43  
44  
45  
46  
47

| Section and Topic                              | Item # | Checklist item                                                                                                                                                                                                                                                                       | Reported on page # |
|------------------------------------------------|--------|--------------------------------------------------------------------------------------------------------------------------------------------------------------------------------------------------------------------------------------------------------------------------------------|--------------------|
| <b>RESULTS</b>                                 |        |                                                                                                                                                                                                                                                                                      |                    |
| Study selection                                | 16a    | Describe the results of the search and selection process, from the number of records identified in the search to the number of studies included in the review, ideally using a flow diagram.                                                                                         | 5                  |
|                                                | 16b    | Cite studies that might appear to meet the inclusion criteria, but which were excluded, and explain why they were excluded.                                                                                                                                                          | 5                  |
| Study characteristics                          | 17     | Cite each included study and present its characteristics.                                                                                                                                                                                                                            | 5                  |
| Risk of bias in studies                        | 18     | Present assessments of risk of bias for each included study.                                                                                                                                                                                                                         | 5                  |
| Results of individual studies                  | 19     | For all outcomes, present, for each study: (a) summary statistics for each group (where appropriate) and (b) an effect estimate and its precision (e.g. confidence/credible interval), ideally using structured tables or plots.                                                     | 6, 7, 8, 9         |
| Results of syntheses                           | 20a    | For each synthesis, briefly summarise the characteristics and risk of bias among contributing studies.                                                                                                                                                                               | 6, 7, 8, 9         |
|                                                | 20b    | Present results of all statistical syntheses conducted. If meta-analysis was done, present for each the summary estimate and its precision (e.g. confidence/credible interval) and measures of statistical heterogeneity. If comparing groups, describe the direction of the effect. | 6, 7, 8, 9         |
|                                                | 20c    | Present results of all investigations of possible causes of heterogeneity among study results.                                                                                                                                                                                       | 6, 7, 8, 9         |
|                                                | 20d    | Present results of all sensitivity analyses conducted to assess the robustness of the synthesized results.                                                                                                                                                                           | NA                 |
| Reporting biases                               | 21     | Present assessments of risk of bias due to missing results (arising from reporting biases) for each synthesis assessed.                                                                                                                                                              | 6, 7, 8, 9         |
| Certainty of evidence                          | 22     | Present assessments of certainty (or confidence) in the body of evidence for each outcome assessed.                                                                                                                                                                                  | 6, 7, 8, 9         |
| <b>DISCUSSION</b>                              |        |                                                                                                                                                                                                                                                                                      |                    |
| Discussion                                     | 23a    | Provide a general interpretation of the results in the context of other evidence.                                                                                                                                                                                                    | 10                 |
|                                                | 23b    | Discuss any limitations of the evidence included in the review.                                                                                                                                                                                                                      | 10                 |
|                                                | 23c    | Discuss any limitations of the review processes used.                                                                                                                                                                                                                                | 11                 |
|                                                | 23d    | Discuss implications of the results for practice, policy, and future research.                                                                                                                                                                                                       | 10, 11             |
| <b>OTHER INFORMATION</b>                       |        |                                                                                                                                                                                                                                                                                      |                    |
| Registration and protocol                      | 24a    | Provide registration information for the review, including register name and registration number, or state that the review was not registered.                                                                                                                                       | 2, 4               |
|                                                | 24b    | Indicate where the review protocol can be accessed, or state that a protocol was not prepared.                                                                                                                                                                                       | 2, 4               |
|                                                | 24c    | Describe and explain any amendments to information provided at registration or in the protocol.                                                                                                                                                                                      | NA                 |
| Support                                        | 25     | Describe sources of financial or non-financial support for the review, and the role of the funders or sponsors in the review.                                                                                                                                                        | 12                 |
| Competing interests                            | 26     | Declare any competing interests of review authors.                                                                                                                                                                                                                                   | 11                 |
| Availability of data, code and other materials | 27     | Report which of the following are publicly available and where they can be found: template data collection forms; data extracted from included studies; data used for all analyses; analytic code; any other materials used in the review.                                           | 12                 |

From: Page MJ, McKenzie JE, Bossuyt PM, Boutron I, Hoffmann TC, Mulrow CD, et al. The PRISMA 2020 statement: an updated guideline for reporting systematic reviews. *BMJ* 2021;372:n71. doi: 10.1136/bmj.n71

For peer review only - <http://bmjopen.bmj.com/site/about/guidelines.xhtml>  
For more information, visit: <http://www.prisma-statement.org>

**Supplementary Table 2: The main characteristics of included studies.**

| Study                    | Year | Country                         | Type of Study             | Article Type        | NOS Score (0-9) | Jadad Score (0-7) | MINORS Score (0-24) |
|--------------------------|------|---------------------------------|---------------------------|---------------------|-----------------|-------------------|---------------------|
| Virasoro, Ramon et al.   | 2022 | USA, Dominican Republic, Panama | Single-arm Clinical Trial | Journal article     | /               | /                 | 10                  |
| Elliott, S. P. et al.    | 2022 | USA, Canada                     | RCT                       | Journal article     | /               | 5                 | /                   |
| Beeder, L. A. et al.     | 2022 | USA                             | Retrospective Case Study  | Journal article     | 3               | /                 | /                   |
| Alibekov, M. M. et al.   | 2021 | Russia                          | Retrospective Case Study  | Journal article     | 2               | /                 | /                   |
| Yi, Y. A. et al.         | 2020 | USA                             | Retrospective Case Study  | Journal article     | 3               | /                 | /                   |
| Kumano, Y. et al.        | 2019 | Japan                           | Case Control Study        | Journal article     | 5               | /                 | /                   |
| Zhou, Y. et al.          | 2016 | China                           | Retrospective Case Study  | Journal article     | 2               | /                 | /                   |
| Yu, S. C. et al.         | 2016 | China                           | Case Control Study        | Journal article     | 6               | /                 | /                   |
| Chhabra, J. S. et al.    | 2016 | India                           | Retrospective Case Study  | Journal article     | 3               | /                 | /                   |
| Ishii, Gen et al.        | 2015 | Japan                           | Retrospective Case Study  | Journal article     | 3               | /                 | /                   |
| Mao, D. et al.           | 2014 | China                           | Retrospective Case Study  | Journal article     | 2               | /                 | /                   |
| Vyas, J. B. et al.       | 2013 | India                           | Retrospective Case Study  | Journal article     | 3               | /                 | /                   |
| Alguersuari, A. et al.   | 2012 | Spain                           | Retrospective Case Study  | Conference abstract | 2               | /                 | /                   |
| MacDiarmid, S. A. et al. | 2000 | USA                             | Retrospective Case Study  | Journal article     | 2               | /                 | /                   |
| Mohammed, S. H. et al.   | 1988 | Denmark                         | Single-arm Clinical Trial | Journal article     | /               | /                 | 6                   |

NOS, Newcastle Ottawa Scale; MINORS, Methodological Index for Non-randomized Studies.

Supplementary Table 3A. Description and decision criteria for each domain in ROBINS-I

| Bias domain                                      | Explanation                                                                                                                                                                                                                                                                                                                                                                                                                                                                                                                                                                                                                                                                                                                                                                                                                                                                                                                                                                  | Judgments                                                                                                                                                                                                                                                                                                                                                                                                                                                                                                                                                                                                                                                                                                                                                                                                                                                                                                                                                                                         |
|--------------------------------------------------|------------------------------------------------------------------------------------------------------------------------------------------------------------------------------------------------------------------------------------------------------------------------------------------------------------------------------------------------------------------------------------------------------------------------------------------------------------------------------------------------------------------------------------------------------------------------------------------------------------------------------------------------------------------------------------------------------------------------------------------------------------------------------------------------------------------------------------------------------------------------------------------------------------------------------------------------------------------------------|---------------------------------------------------------------------------------------------------------------------------------------------------------------------------------------------------------------------------------------------------------------------------------------------------------------------------------------------------------------------------------------------------------------------------------------------------------------------------------------------------------------------------------------------------------------------------------------------------------------------------------------------------------------------------------------------------------------------------------------------------------------------------------------------------------------------------------------------------------------------------------------------------------------------------------------------------------------------------------------------------|
| Bias due to confounding                          | <ol style="list-style-type: none"> <li>1. Is there potential for confounding of the effect of intervention in this study?</li> <li>2. Did the authors use a multivariable-adjusted analysis method that controlled at least for the important confounding domains (age, body mass index, etiology, location of the stricture, length of the stricture, prior intervention management, others) ?</li> <li>3. Were confounding domains that were controlled for measured validly and reliably by the variables available in this study?</li> <li>4. Did the authors control for any post-intervention variables that could have been affected by the intervention?</li> <li>5. Did the authors use an appropriate analysis method that controlled for all the important confounding domains and for time-varying confounding?</li> <li>6. Were confounding domains that were controlled for measured validly and reliably by the variables available in this study?</li> </ol> | <ol style="list-style-type: none"> <li>1. Low risk of bias: No bias expected due to confounding, including time-varying confounding.</li> <li>2. Moderate risk of bias: Confounding is expected: including at least 5 factors of the following factors: age, body mass index, etiology, location of the stricture, length of the stricture, prior intervention management, others (i.e. comorbidities, socio-economic status) and have been appropriately controlled for in a multivariable-adjusted analysis.</li> <li>3. Serious risk of bias: 3-4 above-mentioned factors were measured or appropriately controlled for.</li> <li>4. Critical risk of bias: less than 3 above-mentioned factors were measured or appropriately controlled for.</li> <li>5. No information: No information on which confounders have been controlled for.</li> </ol>                                                                                                                                            |
| Bias in selection of participants into the study | <ol style="list-style-type: none"> <li>1. Was selection of participants into the study based on participant characteristics observed after the start of intervention?</li> <li>2. Were the post-intervention variables that influenced selection likely to be associated with intervention?</li> <li>3. Were the postintervention variables that influenced selection likely to be influenced by the outcome or a cause of the outcome?</li> <li>4. Do start of follow-up and start of intervention coincide for most participants?</li> <li>5. Were adjustment techniques used that are likely to correct for the presence of selection biases?</li> </ol>                                                                                                                                                                                                                                                                                                                  | <ol style="list-style-type: none"> <li>1. Low risk of bias: All participants who would have been eligible for the target study were included in the study.</li> <li>2. Moderate risk of bias: Selection into the study may have been related to exposure and outcome and the authors used appropriate methods to correct for the selection bias.</li> <li>3. Serious risk of bias: Selection into the study was related to intervention and outcome and this could not be corrected for in the analyses; or the start of follow-up and start of exposure do not coincide and the rate ratio is not constant over time.</li> <li>4. Critical risk of bias: Selection into the study was very strongly related to intervention and outcome and this could not be corrected for in the analyses; or a substantial amount of follow-up time is likely to be missing from analyses 3.the rate ratio is not constant over time.</li> <li>5. No information: No information is reported about</li> </ol> |

|                                                    |                                                                                                                                                                                                                                                                                                                                                                                                             |                                                                                                                                                                                                                                                                                                                                                                                                                                                                                                                                                                                                                                                                                                                                                                                                                                                                                                    |
|----------------------------------------------------|-------------------------------------------------------------------------------------------------------------------------------------------------------------------------------------------------------------------------------------------------------------------------------------------------------------------------------------------------------------------------------------------------------------|----------------------------------------------------------------------------------------------------------------------------------------------------------------------------------------------------------------------------------------------------------------------------------------------------------------------------------------------------------------------------------------------------------------------------------------------------------------------------------------------------------------------------------------------------------------------------------------------------------------------------------------------------------------------------------------------------------------------------------------------------------------------------------------------------------------------------------------------------------------------------------------------------|
|                                                    |                                                                                                                                                                                                                                                                                                                                                                                                             | selection of participants into the study.                                                                                                                                                                                                                                                                                                                                                                                                                                                                                                                                                                                                                                                                                                                                                                                                                                                          |
| Bias in classification of interventions            | <ol style="list-style-type: none"> <li>1. Were intervention groups clearly defined?</li> <li>2. Was the information used to define intervention groups recorded at the start of the intervention?</li> <li>3. Could classification of intervention status have been affected by knowledge of the outcome or risk of the outcome?</li> </ol>                                                                 | <ol style="list-style-type: none"> <li>1. Low risk of bias: The patient clearly underwent urethral balloon dilation, and no measurement error is expected in its assessment.</li> <li>2. Moderate risk of bias: Intervention status is well defined and some aspects of the assignments of intervention status were determined retrospectively.</li> <li>3. Serious risk of bias: Intervention status is not well defined; or major aspects of the assignments of intervention status were determined in a way that could have been affected by knowledge of the outcome.</li> <li>4. Critical risk of bias: An extremely high amount of misclassification of intervention status (i.e. because of unusually strong recall biases).</li> <li>5. No information: No definition of the intervention or no explanation of the source of information about intervention status is reported.</li> </ol> |
| Bias due to deviations from intended interventions | <ol style="list-style-type: none"> <li>1. Were there deviations from the intended intervention beyond what would be expected in usual practice?</li> <li>2. Were these deviations from intended intervention unbalanced between groups and likely to have affected the outcome?</li> </ol>                                                                                                                  | <ol style="list-style-type: none"> <li>1. Low risk of bias: Patients did not receive other invasive urethral stricture treatments between the time they underwent balloon dilatation and the follow-up period to assess success.</li> <li>2. Moderate risk of bias: There were deviations from usual practice, but their impact on the outcome is expected to be slight.</li> <li>3. Serious or critical risk of bias: There were deviations from usual practice that were unbalanced between the intervention groups and likely to have affected the outcome.</li> <li>4. Critical risk of bias: There were substantial deviations from usual practice that were unbalanced between the intervention groups and likely to have affected the outcome.</li> <li>5. No information: No information on deviations from the intervention is reported.</li> </ol>                                       |
| Bias due to missing data                           | <ol style="list-style-type: none"> <li>1. Were outcome data available for all, or nearly all, participants?</li> <li>2. Were participants excluded due to missing data on intervention status?</li> <li>3. Were participants excluded due to missing data on other variables needed for the analysis?</li> <li>4. Are the proportion of participants and reasons for missing data similar across</li> </ol> | <ol style="list-style-type: none"> <li>1. Low risk of bias: Little loss-to-follow-up and data on intervention and other variables were reasonably complete (&lt;10% missing data) and was unlikely to introduce bias; or the analysis addressed missing data and is likely to have removed any risk of bias.</li> <li>2. Moderate risk of bias: There is a proportion of missing data in the original cohort or a high proportion of loss-to-follow-up; and the analysis is unlikely to have removed the risk of bias arising</li> </ol>                                                                                                                                                                                                                                                                                                                                                           |



|                                          |                                                                                                                                                                                                                                                                                                                                                                                             |                                                                                                                                                                                                                                                                                                                                                                                                                                                                                                                                                                                                                                                                                                                                                                                                                                                                                                                                                                                                                                                                                                                                                                                                                                                                                                                    |
|------------------------------------------|---------------------------------------------------------------------------------------------------------------------------------------------------------------------------------------------------------------------------------------------------------------------------------------------------------------------------------------------------------------------------------------------|--------------------------------------------------------------------------------------------------------------------------------------------------------------------------------------------------------------------------------------------------------------------------------------------------------------------------------------------------------------------------------------------------------------------------------------------------------------------------------------------------------------------------------------------------------------------------------------------------------------------------------------------------------------------------------------------------------------------------------------------------------------------------------------------------------------------------------------------------------------------------------------------------------------------------------------------------------------------------------------------------------------------------------------------------------------------------------------------------------------------------------------------------------------------------------------------------------------------------------------------------------------------------------------------------------------------|
|                                          | <p>interventions?</p> <p>5. Is there evidence that results were robust to the presence of missing data?</p>                                                                                                                                                                                                                                                                                 | <p>from the missing data (i.e. using logistic regression).</p> <p>3. Serious risk of bias: High proportions (&gt;50%) of missing data; and the analysis is unlikely to have removed the risk of bias arising from the missing data; or missing data were addressed inappropriately in the analysis; or the nature of the missing data means that the risk of bias cannot be removed through appropriate analysis.</p> <p>4. Critical risk of bias: There were critical differences between interventions in participants with missing data; and missing data were not, or could not, be addressed through appropriate analysis.</p> <p>5. No information: No information is reported about missing data or the potential for data to be missing.</p>                                                                                                                                                                                                                                                                                                                                                                                                                                                                                                                                                               |
| Bias in measurement of outcomes          | <p>1. Could the outcome measure have been influenced by knowledge of the intervention received?</p> <p>2. Were outcome assessors aware of the intervention received by study participants?</p> <p>3. Were the methods of outcome assessment comparable across intervention groups?</p> <p>4. Were any systematic errors in measurement of the outcome related to intervention received?</p> | <p>1. Low risk of bias: The methods of outcome assessment were comparable across intervention groups; and the outcome measure was unlikely to be influenced by knowledge of the intervention status of study participants; and any error in measuring the outcome is unrelated to intervention status (i.e., objective measures such as confirmed medical records, record linkage).</p> <p>2. Moderate risk of bias: The methods of outcome assessment were comparable across intervention groups; and any error in measuring the outcome may be minimally related to intervention status or if the outcome measure was not reliably measured (i.e. confirmed records are not available for the whole study population).</p> <p>3. Serious risk of bias: The methods of outcome assessment were not comparable across intervention groups; or the outcome measure was subjective (i.e. vulnerable to influence by knowledge of the intervention received by study participants); and error in measuring the outcome was related to intervention status.</p> <p>4. Critical risk of bias: The methods of outcome assessment were so different that they cannot reasonably be compared across intervention groups.</p> <p>5. No information: No information is reported about the methods of outcome assessment.</p> |
| Bias in selection of the reported result | <p>1. Is the reported effect estimate likely to be selected from multiple analyses of the intervention-outcome relationship?</p>                                                                                                                                                                                                                                                            | <p>1. Low risk of bias: There is a clear description of all analyses and the analyses are consistent and all reported results correspond to all intended outcomes,</p>                                                                                                                                                                                                                                                                                                                                                                                                                                                                                                                                                                                                                                                                                                                                                                                                                                                                                                                                                                                                                                                                                                                                             |

|  |                                                                                           |                                                                                                                                                                                                                                                                                                                                                                                                                                                                                                                                                                                                                                                                                                                                                                                                                                                                                                    |
|--|-------------------------------------------------------------------------------------------|----------------------------------------------------------------------------------------------------------------------------------------------------------------------------------------------------------------------------------------------------------------------------------------------------------------------------------------------------------------------------------------------------------------------------------------------------------------------------------------------------------------------------------------------------------------------------------------------------------------------------------------------------------------------------------------------------------------------------------------------------------------------------------------------------------------------------------------------------------------------------------------------------|
|  | <p>2. Is the reported effect estimate likely to be selected from different subgroups?</p> | <p>analyses and sub-cohorts.</p> <p>2. Moderate risk of bias: The analyses are clearly defined; and there is an indication of selection of the reported analysis from among multiple analyses; and there is an indication of selection of the cohort or subgroups for analysis and reporting on the basis of the results (i.e. estimates not shown for all analyses).</p> <p>3. Serious risk of bias: There is a high risk of selective reporting from among multiple analyses; or the cohort or subgroup is selected from a larger study for analysis and appears to be reported based on the results.</p> <p>4. Critical risk of bias: There is evidence or strong suspicion of selective reporting of results; and the unreported results are likely to be substantially different from the reported results.</p> <p>5. No information: There is too little information to make a judgment.</p> |
|--|-------------------------------------------------------------------------------------------|----------------------------------------------------------------------------------------------------------------------------------------------------------------------------------------------------------------------------------------------------------------------------------------------------------------------------------------------------------------------------------------------------------------------------------------------------------------------------------------------------------------------------------------------------------------------------------------------------------------------------------------------------------------------------------------------------------------------------------------------------------------------------------------------------------------------------------------------------------------------------------------------------|

### Overall judgment

1. Low risk of bias

The study is judged to be at a low risk of bias for all domains.

2. Moderate risk of bias

The study is judged to be at low or moderate risk of bias for all domains.

3. Serious risk of bias

The study is judged to be at serious risk of bias in at least one domain, but not at critical risk in any domain.

4. Critical risk of bias

The study is judged to be at critical risk of bias in at least one domain.

Supplementary Table 3B. Quality assessment results using the ROBINS-I tool

| Study                         | Bias due to confounding | Bias in selection of participants into the study | Bias in classification of interventions | Bias due to deviations from intended interventions | Bias due to missing data | Bias in measurement of outcomes | Bias in selection of the reported result | Overall judgment |
|-------------------------------|-------------------------|--------------------------------------------------|-----------------------------------------|----------------------------------------------------|--------------------------|---------------------------------|------------------------------------------|------------------|
| Virasoro, Ramon et al. 2022   | Moderate                | Moderate                                         | Low                                     | Low                                                | Moderate                 | Moderate                        | Moderate                                 | Serious          |
| Beeder, L. A. et al. 2022     | Moderate                | Serious                                          | Moderate                                | Low                                                | Low                      | Serious                         | Moderate                                 | Serious          |
| Alibekov, M. M. et al. 2022   | Serious                 | Serious                                          | Moderate                                | Low                                                | Low                      | Serious                         | Serious                                  | Serious          |
| Yi, Y. A. et al. 2020         | Moderate                | Serious                                          | Moderate                                | Low                                                | Low                      | Moderate                        | Moderate                                 | Serious          |
| Umamo, Y. et al. 2019         | Serious                 | Serious                                          | Moderate                                | Low                                                | Low                      | Serious                         | Moderate                                 | Serious          |
| Zhou, Y. et al. 2016          | Moderate                | Serious                                          | Moderate                                | Low                                                | Low                      | Moderate                        | Moderate                                 | Serious          |
| Yu, S. C. et al. 2016         | Moderate                | Serious                                          | Moderate                                | Low                                                | Low                      | Moderate                        | Moderate                                 | Serious          |
| Chhabra, J. S. et al. 2016    | Moderate                | Serious                                          | Moderate                                | Low                                                | Low                      | Moderate                        | Moderate                                 | Serious          |
| Ishii, Gen et al. 2015        | Serious                 | Critical                                         | Moderate                                | Low                                                | Low                      | Serious                         | Moderate                                 | Critical         |
| Mao, D. et al. 2014           | Moderate                | Serious                                          | Moderate                                | Low                                                | Low                      | Moderate                        | Moderate                                 | Serious          |
| Vyas, J. B. et al. 2013       | Serious                 | Serious                                          | Moderate                                | Low                                                | Low                      | Moderate                        | Moderate                                 | Serious          |
| Alguersuari, et al. 2012      | Serious                 | Serious                                          | Moderate                                | Low                                                | Low                      | Serious                         | Serious                                  | Serious          |
| MacDiarmid, S. A. et al. 2000 | Serious                 | Serious                                          | Moderate                                | Low                                                | Moderate                 | Serious                         | Moderate                                 | Serious          |
| Mohammed, S. H. et al. 1988   | Critical                | Serious                                          | Low                                     | Low                                                | Moderate                 | Serious                         | Serious                                  | Critical         |

**Supplementary Table 4: Sensitivity analysis of the pooled results of conventional balloon dilation success rate.**

| <b>Excluded Study</b>       | <b>Pooled Results (%)</b> | <b>95% Confidence Interval</b> |       |
|-----------------------------|---------------------------|--------------------------------|-------|
| Beeder, L. A. et al. 2022   | 69.57                     | 58.61                          | 79.55 |
| Yi, Y. A. et al. 2020       | 67.12                     | 54.10                          | 78.96 |
| Zhou, Y. et al. 2016        | 64.13                     | 52.45                          | 75.03 |
| Yu, S. C. et al. 2016       | 70.64                     | 60.47                          | 79.90 |
| Chhabra, J. S. et al. 2016  | 64.05                     | 53.49                          | 73.99 |
| Mao, D. et al. 2014         | 67.31                     | 54.95                          | 78.59 |
| Vyas, J. B. et al. 2013     | 66.76                     | 53.20                          | 79.09 |
| Alguersuari, A. et al. 2012 | 66.69                     | 53.81                          | 78.45 |

Supplementary Figure 1: The funnel plot of conventional balloon dilation success rate.

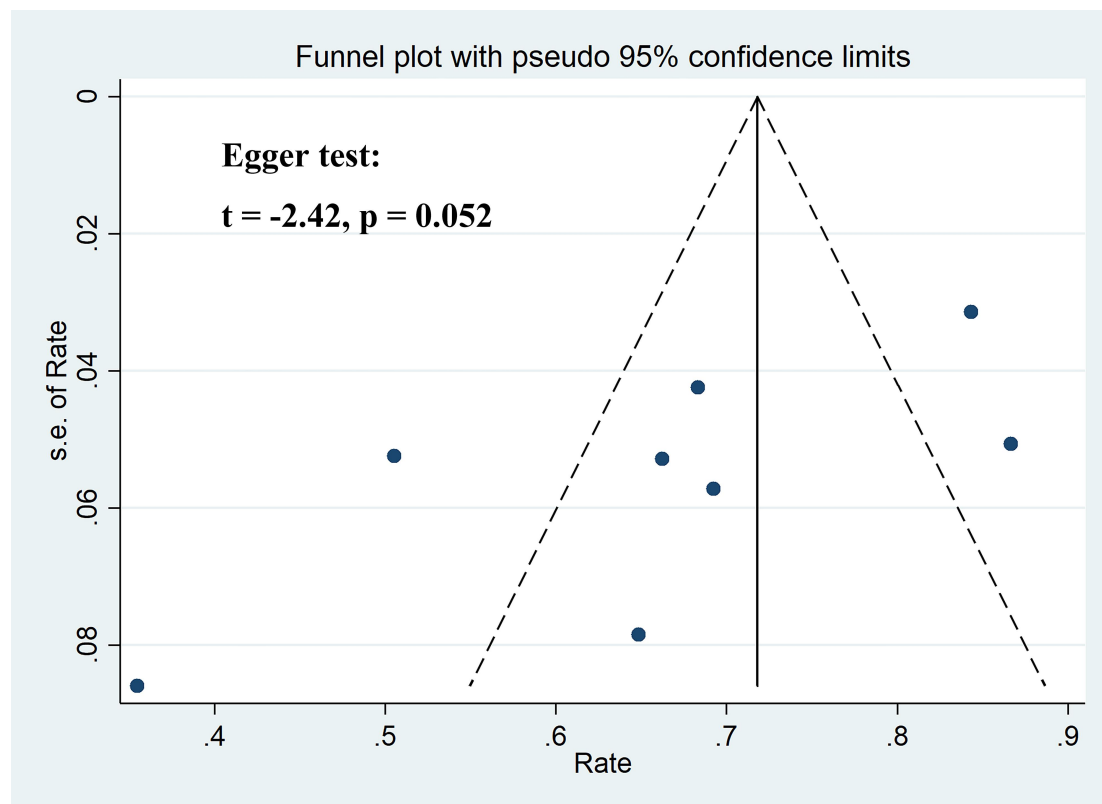

Review only

**Supplementary Figure 2: Forest plots showing the safety of balloon dilation. (A) Incidence of infection; (B) Incidence of urinary retention. CI, confidence interval.**

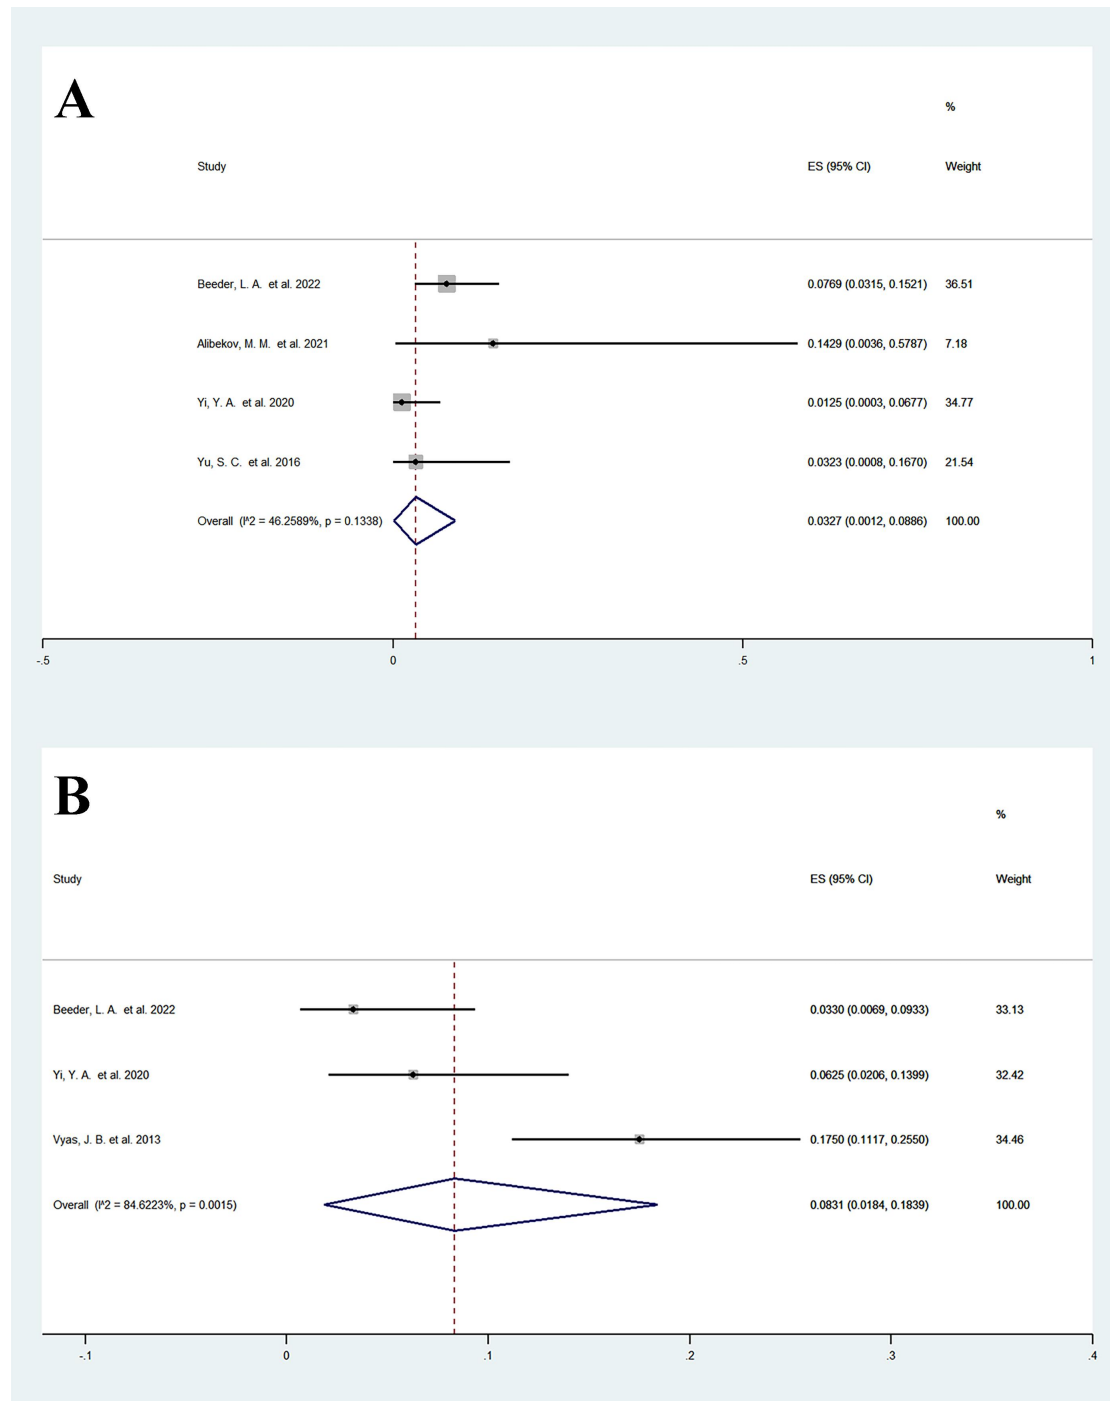

Supplementary Figure 3: The sensitivity analysis of conventional balloon dilation success rate.

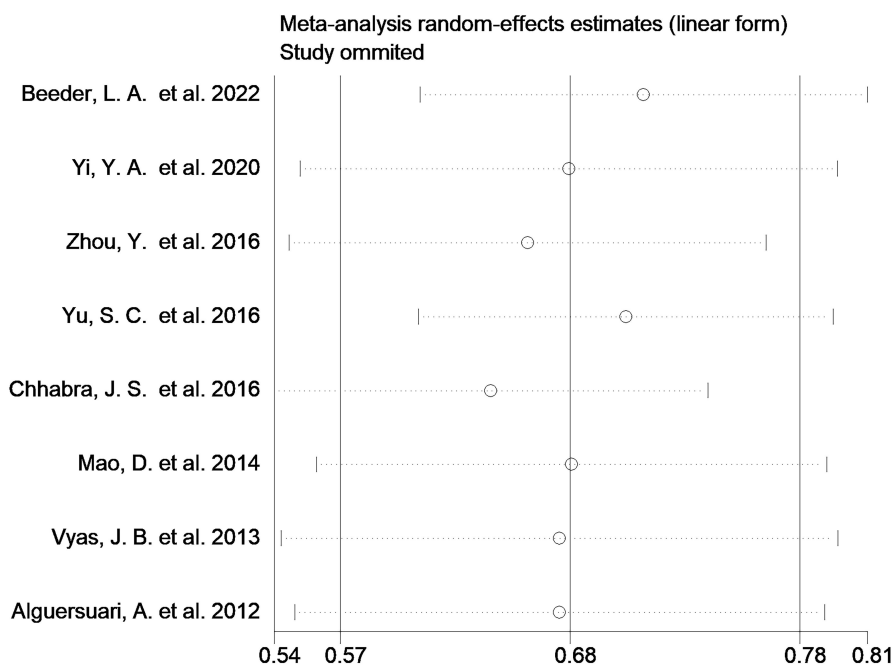

review only



**Supplementary Figure 4: Forest plots showing the subgroup analysis of conventional balloon dilation success rate according to the percentage of anterior urethral strictures.**

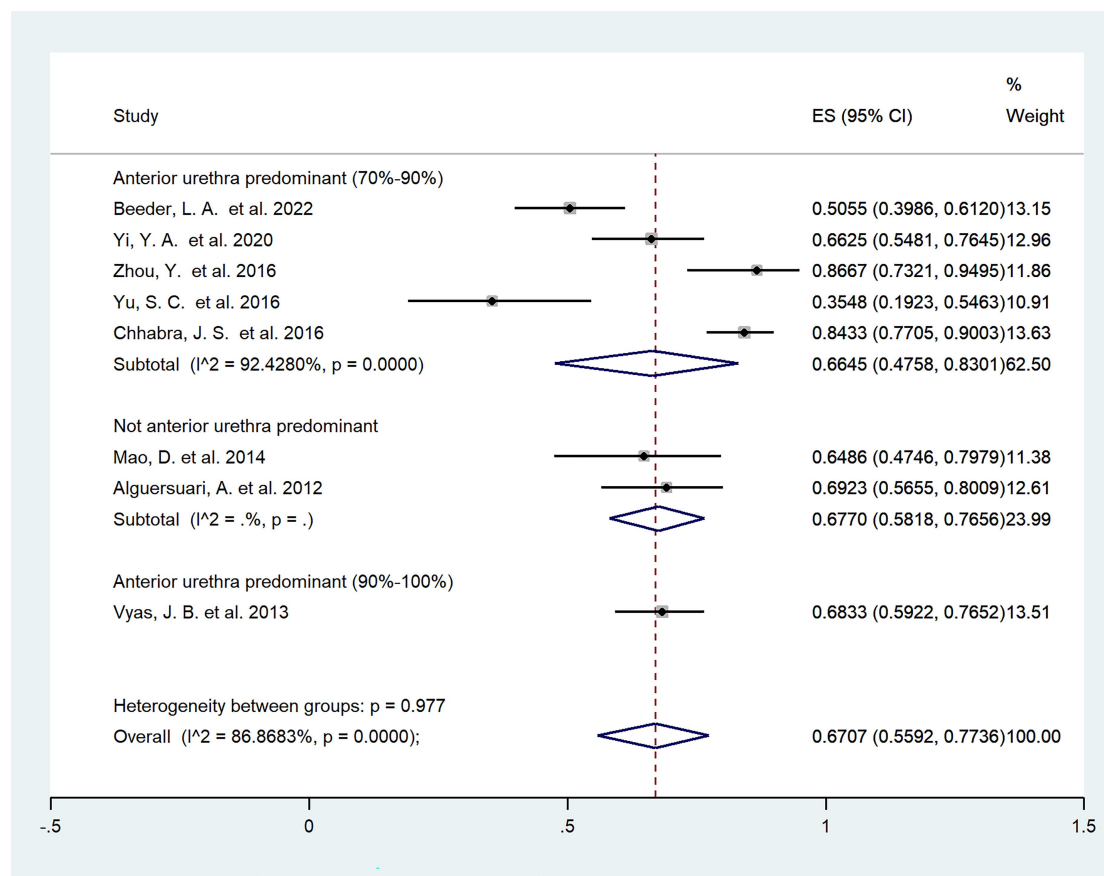

**Supplementary Figure 5: Forest plots showing other possible influencing factors of balloon dilation. (A) with and without previous urethroplasty; (B) History of smoking; (C) Coronary heart disease; (D) Diabetes mellitus; (E) Hypertension; (F) Chronic obstructive pulmonary disease. CI, confidence interval.**

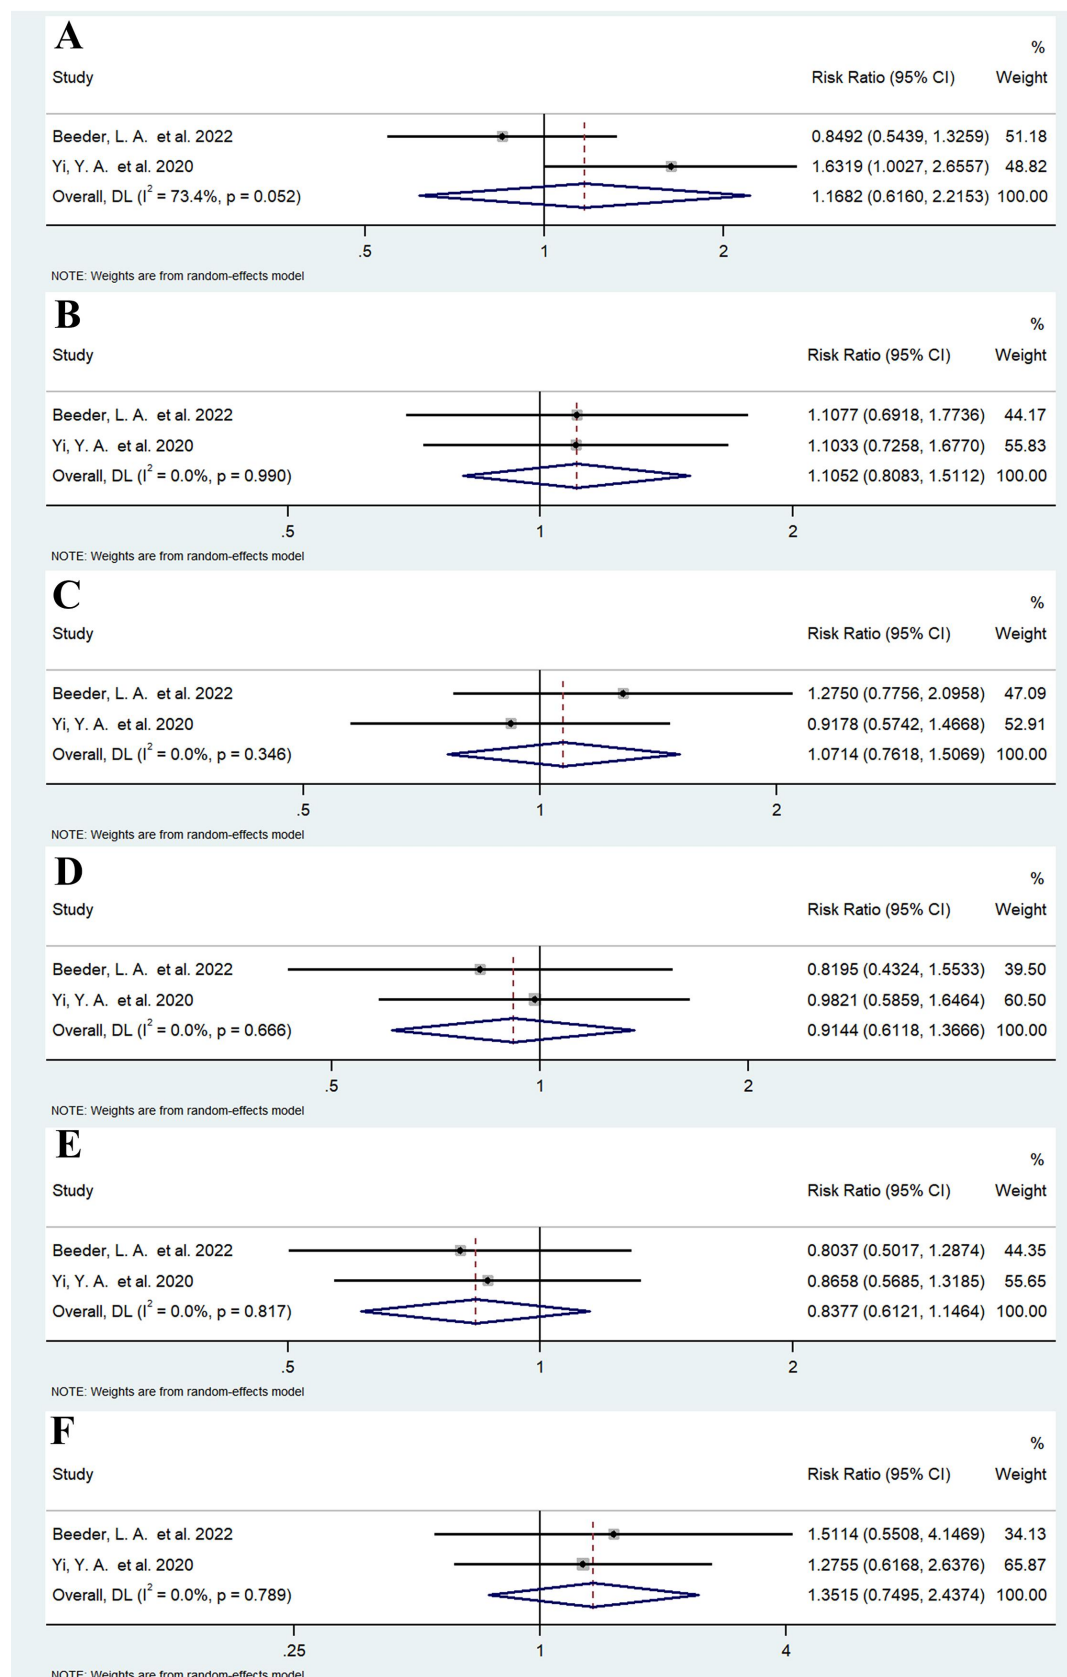

Supplement: bmjopen-2023-071923.draft_revisions.pdf [file bmjopen-2023-071923.draft_revisions.pdf]
