# Supplementary material for: Balloon dilation for the treatment of male urethral strictures: a systematic review and meta-analysis
Source: PubMed Central journal article supplement — BMJ Open. 2024 Feb 6;14(2):e071923. doi: 10.1136/bmjopen-2023-071923 (PMC10860052; doi:10.1136/bmjopen-2023-071923), 2024-02-06
Supplement: bmjopen-2023-071923supp002.pdf [file bmjopen-2023-071923supp002.pdf]

### Supplementary File. Search strategy

(Urethral Stricture OR Stricture, Urethral OR Strictures, Urethral OR Urethral Strictures OR Urethral Stenosis OR Stenoses, Urethral OR Stenosis, Urethral OR Urethral Stenoses OR Anterior Urethral Stricture OR Anterior Urethral Strictures OR Urethral Strictures, Anterior OR Urethral Stricture, Anterior OR Posterior Urethral Stricture OR Posterior Urethral Strictures OR Urethral Strictures, Posterior OR Urethral Stricture, Posterior) AND (Dilatation OR Dilatations OR Dilation OR Dilations) AND (Balloon)

#### MEDLINE

#1. TS=(Urethral Stricture OR Stricture, Urethral OR Strictures, Urethral OR Urethral Strictures OR Urethral Stenosis OR Stenoses, Urethral OR Stenosis, Urethral OR Urethral Stenoses OR Anterior Urethral Stricture OR Anterior Urethral Strictures OR Urethral Strictures, Anterior OR Urethral Stricture, Anterior OR Posterior Urethral Stricture OR Posterior Urethral Strictures OR Urethral Strictures, Posterior OR Urethral Stricture, Posterior)

#2. TS=(Dilatation OR Dilatations OR Dilation OR Dilations)

#3. TS=(Balloon)

**#1 AND #2 AND #3**

#### Web of Science (WOS)

#1. TS=(Urethral Stricture OR Stricture, Urethral OR Strictures, Urethral OR Urethral Strictures OR Urethral Stenosis OR Stenoses, Urethral OR Stenosis, Urethral OR Urethral Stenoses OR Anterior Urethral Stricture OR Anterior Urethral Strictures OR Urethral Strictures, Anterior OR Urethral Stricture, Anterior OR Posterior Urethral Stricture OR Posterior Urethral Strictures OR Urethral Strictures, Posterior OR Urethral Stricture, Posterior)

#2. TS=(Dilatation OR Dilatations OR Dilation OR Dilations)

#3. TS=(Balloon)

**#1 AND #2 AND #3**

#### EMBASE

#1. 'Stricture, Urethral':ab,ti OR 'Strictures, Urethral':ab,ti OR 'Urethral Strictures':ab,ti OR 'Urethral Stenosis':ab,ti OR 'Stenoses, Urethral':ab,ti OR 'Stenosis, Urethral':ab,ti OR 'Urethral Stenoses':ab,ti OR 'Anterior Urethral Stricture':ab,ti OR 'Anterior Urethral Strictures':ab,ti OR 'Urethral Strictures, Anterior':ab,ti OR 'Urethral Stricture, Anterior':ab,ti OR 'Posterior Urethral Stricture':ab,ti OR 'Posterior Urethral Strictures':ab,ti OR 'Urethral Strictures, Posterior':ab,ti OR 'Urethral Stricture, Posterior':ab,ti

#2. 'Dilatation':ab,ti OR 'Dilatations':ab,ti OR 'Dilation':ab,ti OR 'Dilations':ab,ti

#3. 'Balloon':ab,ti

**#1 AND #2 AND #3**

#### Cochrane Library

#1. (Urethral Stricture):ti,ab OR (Strictures, Urethral):ti,ab OR (Stricture, Urethral):ti,ab OR (Urethral Strictures):ti,ab OR (Urethral Stenosis):ti,ab OR (Stenoses, Urethral):ti,ab OR (Stenosis, Urethral):ti,ab OR (Urethral Stenoses):ti,ab OR (Anterior Urethral Stricture):ti,ab OR (Anterior

Urethral Strictures):ti,ab OR (Urethral Strictures, Anterior):ti,ab OR (Urethral Stricture, Anterior):ti,ab OR (Posterior Urethral Stricture):ti,ab OR (Posterior Urethral Strictures):ti,ab OR (Urethral Strictures, Posterior):ti,ab OR (Urethral Stricture, Posterior):ti,ab

#2. (Dilatations):ti,ab OR (Dilatation):ti,ab OR (Dilation):ti,ab OR (Dilations):ti,ab

#3. (Balloon):ti,ab

**#1 AND #2 AND #3**

### **Scopus**

#1. TITLE-ABS-KEY("Urethral Stricture" OR "Stricture, Urethral" OR "Strictures, Urethral" OR "Urethral Strictures" OR "Urethral Stenosis" OR "Stenoses, Urethral" OR "Stenosis, Urethral" OR "Urethral Stenoses" OR "Anterior Urethral Stricture" OR "Anterior Urethral Strictures" OR "Urethral Strictures, Anterior" OR "Urethral Stricture, Anterior" OR "Posterior Urethral Stricture" OR "Posterior Urethral Strictures" OR "Urethral Strictures, Posterior" OR "Urethral Stricture, Posterior")

#2. TITLE-ABS-KEY("Dilatation" OR "Dilatations" OR "Dilation" OR "Dilations")

#3. TITLE-ABS-KEY("Balloon")

**#1 AND #2 AND #3**
