# Supplementary material for: Balloon dilation for the treatment of male urethral strictures: a systematic review and meta-analysis
Source: PubMed Central journal article supplement — BMJ Open. 2024 Feb 6;14(2):e071923. doi: 10.1136/bmjopen-2023-071923 (PMC10860052; doi:10.1136/bmjopen-2023-071923), 2024-02-06
Supplement: bmjopen-2023-071923supp003.pdf [file bmjopen-2023-071923supp003.pdf]

**Supplementary Table 2: The main characteristics of included studies.**

| Study                    | Year | Country                         | Type of Study             | Article Type        | NOS Score (0-9) | Jadad Score (0-7) | MINORS Score (0-24) |
|--------------------------|------|---------------------------------|---------------------------|---------------------|-----------------|-------------------|---------------------|
| Virasoro, Ramon et al.   | 2022 | USA, Dominican Republic, Panama | Single-arm Clinical Trial | Journal article     | /               | /                 | 10                  |
| Elliott, S. P. et al.    | 2022 | USA, Canada                     | RCT                       | Journal article     | /               | 5                 | /                   |
| Beeder, L. A. et al.     | 2022 | USA                             | Retrospective Case Study  | Journal article     | 3               | /                 | /                   |
| Alibekov, M. M. et al.   | 2021 | Russia                          | Retrospective Case Study  | Journal article     | 2               | /                 | /                   |
| Yi, Y. A. et al.         | 2020 | USA                             | Retrospective Case Study  | Journal article     | 3               | /                 | /                   |
| Kumano, Y. et al.        | 2019 | Japan                           | Case Control Study        | Journal article     | 5               | /                 | /                   |
| Zhou, Y. et al.          | 2016 | China                           | Retrospective Case Study  | Journal article     | 2               | /                 | /                   |
| Yu, S. C. et al.         | 2016 | China                           | Case Control Study        | Journal article     | 6               | /                 | /                   |
| Chhabra, J. S. et al.    | 2016 | India                           | Retrospective Case Study  | Journal article     | 3               | /                 | /                   |
| Ishii, Gen et al.        | 2015 | Japan                           | Retrospective Case Study  | Journal article     | 3               | /                 | /                   |
| Mao, D. et al.           | 2014 | China                           | Retrospective Case Study  | Journal article     | 2               | /                 | /                   |
| Vyas, J. B. et al.       | 2013 | India                           | Retrospective Case Study  | Journal article     | 3               | /                 | /                   |
| Alguersuari, A. et al.   | 2012 | Spain                           | Retrospective Case Study  | Conference abstract | 2               | /                 | /                   |
| MacDiarmid, S. A. et al. | 2000 | USA                             | Retrospective Case Study  | Journal article     | 2               | /                 | /                   |
| Mohammed, S. H. et al.   | 1988 | Denmark                         | Single-arm Clinical Trial | Journal article     | /               | /                 | 6                   |

NOS, Newcastle Ottawa Scale; MINORS, Methodological Index for Non-randomized Studies.
