# Supplementary material for: Balloon dilation for the treatment of male urethral strictures: a systematic review and meta-analysis
Source: PubMed Central journal article supplement — BMJ Open. 2024 Feb 6;14(2):e071923. doi: 10.1136/bmjopen-2023-071923 (PMC10860052; doi:10.1136/bmjopen-2023-071923), 2024-02-06
Supplement: bmjopen-2023-071923supp007.pdf [file bmjopen-2023-071923supp007.pdf]

**Supplementary Table 4: Sensitivity analysis of the pooled results of conventional balloon dilation success rate.**

| <b>Excluded Study</b>       | <b>Pooled Results (%)</b> | <b>95% Confidence Interval</b> |       |
|-----------------------------|---------------------------|--------------------------------|-------|
| Beeder, L. A. et al. 2022   | 69.57                     | 58.61                          | 79.55 |
| Yi, Y. A. et al. 2020       | 67.12                     | 54.10                          | 78.96 |
| Zhou, Y. et al. 2016        | 64.13                     | 52.45                          | 75.03 |
| Yu, S. C. et al. 2016       | 70.64                     | 60.47                          | 79.90 |
| Chhabra, J. S. et al. 2016  | 64.05                     | 53.49                          | 73.99 |
| Mao, D. et al. 2014         | 67.31                     | 54.95                          | 78.59 |
| Vyas, J. B. et al. 2013     | 66.76                     | 53.20                          | 79.09 |
| Alguersuari, A. et al. 2012 | 66.69                     | 53.81                          | 78.45 |
