# Supplementary material for: Balloon dilation for the treatment of male urethral strictures: a systematic review and meta-analysis
Source: PubMed Central journal article supplement — BMJ Open. 2024 Feb 6;14(2):e071923. doi: 10.1136/bmjopen-2023-071923 (PMC10860052; doi:10.1136/bmjopen-2023-071923), 2024-02-06

**Supplementary Figure 5: Forest plots showing other possible influencing factors of balloon dilation. (A) with and without previous urethroplasty; (B) History of smoking; (C) Coronary heart disease; (D) Diabetes mellitus; (E) Hypertension; (F) Chronic obstructive pulmonary disease. CI, confidence interval.**

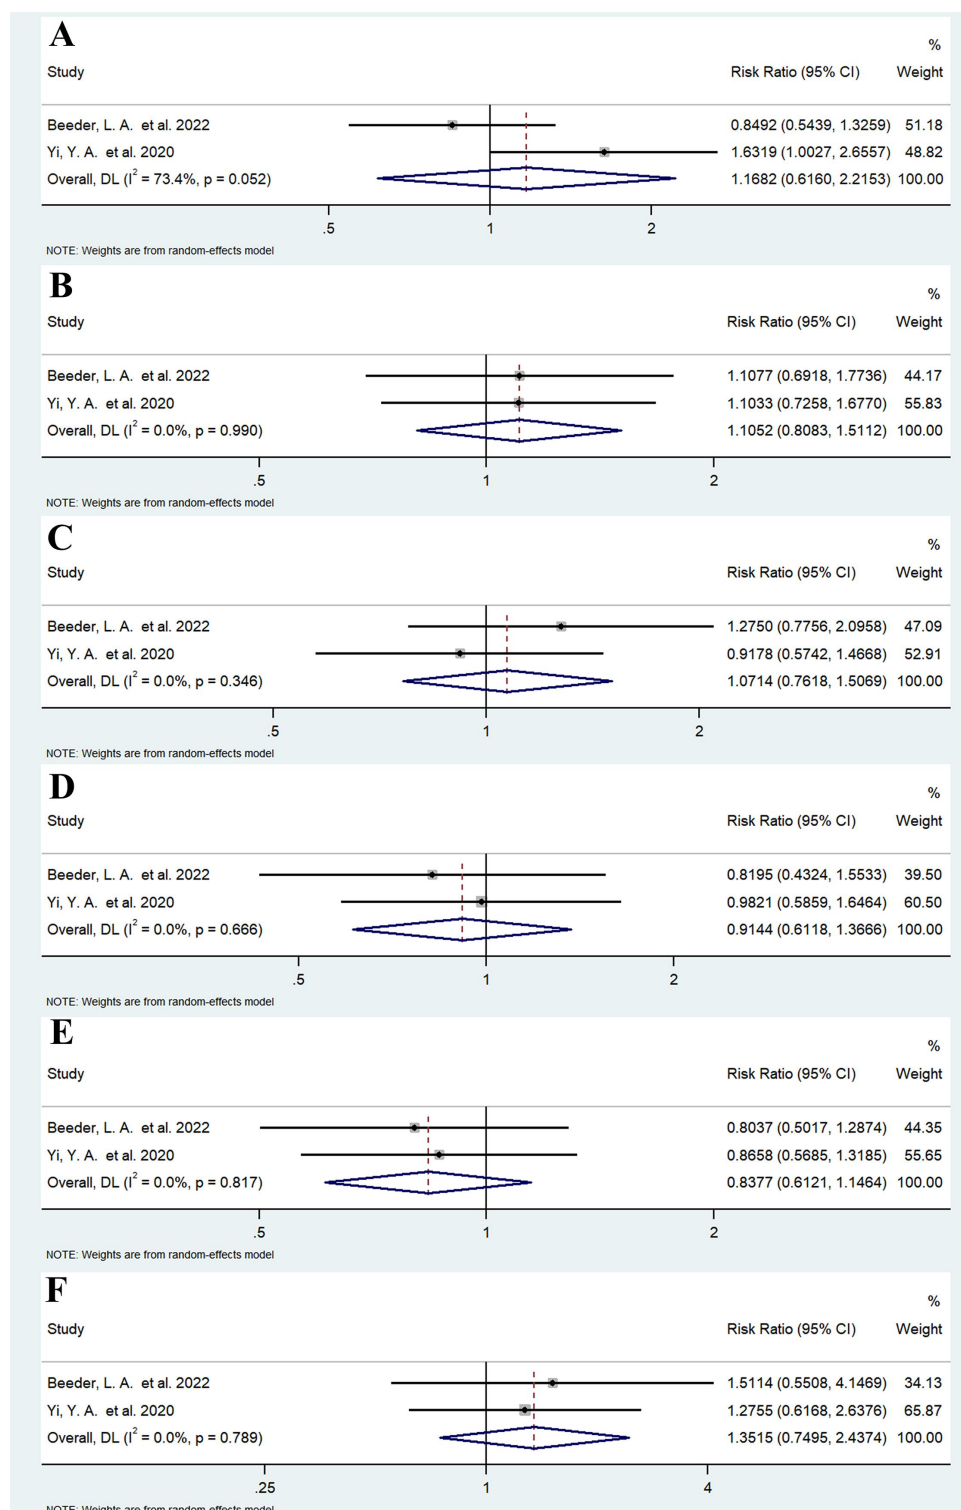

Supplement: bmjopen-2023-071923supp010.pdf [file bmjopen-2023-071923supp010.pdf]
