# Supplementary figures and images for: Balloon dilation for the treatment of male urethral strictures: a systematic review and meta-analysis
Source: PubMed Central journal article supplement — BMJ Open. 2024 Feb 6;14(2):e071923. doi: 10.1136/bmjopen-2023-071923 (PMC10860052; doi:10.1136/bmjopen-2023-071923), 2024-02-06

Supplementary Figure 1: The funnel plot of conventional balloon dilation success rate.

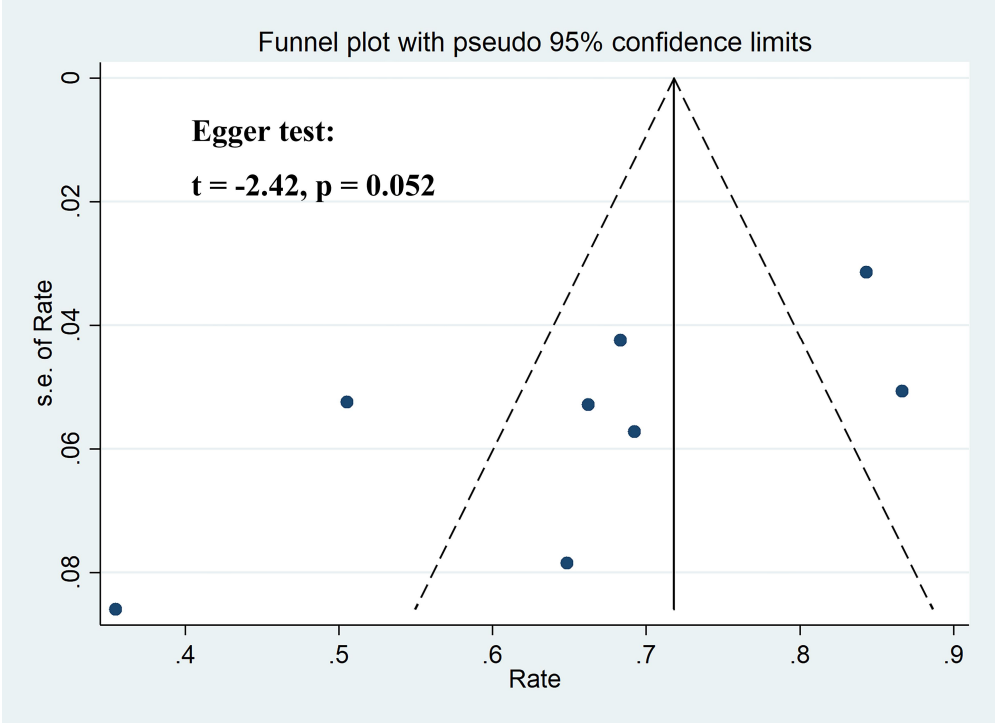

Supplement: bmjopen-2023-071923supp005.pdf [file bmjopen-2023-071923supp005.pdf]
